# Supplementary material
Source: publisher figshare collection journal article supplement (https://gsapubs.figshare.com/ndownloader/files/34781836)
Supplement: Supplementary file 1 [file 34781836]

## Sheet: Title-Method
This Supplemental Material accompanies Willner, A.P., van Staal, C.R., Glodny, J., Sudo, M., and Zagorevski, A., 2022, Conditions and timing of metamorphism near the Baie Verte Line
(Baie Verte Peninsula, NW Newfoundland, Canada): Multiple reactivations within the suture zone of an arc-continent collision, in Kuiper, Y.D., Murphy, J.B., Nance, R.D., Strachan, R.A.,
and Thompson, M.D., eds., New Developments in the Appalachian-Caledonian-Variscan Orogen: Geological Society of America Special Paper 554, https://doi.org/10.1130/2022.2554(09).
Mineral analyses in the electronic deposit for manuscript
Conditions and timing of metamorphism near the Baie Verte Line (Baie Verte Peninsula; NW Newfoundland, Canada), multiple re-activation within a suture zone of an arc-continent collision
By
Willner, A.P., van Staal, C.R. , Glodny, J., Sudo, M. and Zagorevski, A.
Analytical method:
Mineral compositions were obtained using a CAMECA SX 100 electron microprobe with 5 wavelength-dispersive systems at the Universities of Stuttgart and Bochum, Germany.
Operating conditions were an acceleration voltage of 15 kV, a beam current of 10 nA, 20s counting time per element each on the peak and the background
and preferably a slightly defocused beam of 5 μm in order to avoid loss of alkalies in mica and amphibole. The following standards were used: natural wollastonite (Si, Ca), corundum (Al),
synthetic periclase (Mg), synthetic rutile (Ti), natural hematite (Fe), natural albite (Na), natural orthoclase (K), natural rhodonite (Mn) and natural baryte (Ba).
The PAP correction procedure provided by Cameca was used for matrix corrections.

## Sheet: WhiteMica
White Mica																																	White Mica
Birchy Complex																																	Birchy Complex
Mafic rock	lab#	SiO2	Al2O3	TiO2	Fe2O3*	FeO*	MgO	MnO	CaO	BaO	Na2O	K2O	H2O'	sum	Si	Alt	sum	Alo	Ti	Fe3+	Fe2+	Mn	Mg	sum	Ba	Ca	Na	K	sum	OH	O*	XMg	Mafic rock
16Ca107.	114	49.1063	26.9286	0.1235	0	3.4504	2.9965	0.0129	0.0364		0.1685	10.5704	4.3795	97.9805	6.7239	1.2761	8	3.0696	0.0127	0	0.3951	0.0015	0.6117	4.0905		0.0053	0.0447	1.8464	1.8965	4	19.9846	0.607569	16Ca107.
16Ca107.	119	51.1087	26.1011	0.0634	0	3.453	3.232	0.0723	0.1399		0.0337	10.7403	4.461	99.4492	6.8702	1.1298	8	3.0053	0.0064	0	0.3882	0.0082	0.6477	4.0558		0.0202	0.0088	1.8418	1.8708	4	19.9525	0.625253	16Ca107.
16Ca107.	120	50.8606	27.6693	0.0818	0	3.2523	3.0877	0	0.1357		0	10.7872	4.5141	100.459	6.7564	1.2436	8	3.0884	0.0082	0	0.3613	0	0.6115	4.0694		0.0193	0	1.8281	1.8474	4	19.9444	0.628598	16Ca107.
16Ca107.	122	50.1011	27.0344	0.0484	0	3.6369	3.0695	0.0271	0.042		0.1577	10.7921	4.4463	99.5484	6.757	1.243	8	3.0542	0.0049	0	0.4102	0.0031	0.6171	4.0895		0.0061	0.0412	1.8568	1.9041	4	19.986	0.600701	16Ca107.
16Ca107.	30	49.117	25.2961	0.0384	3.7353	1.8402	3.7908	0.062	0.0266		0.1267	9.885	4.4114	98.3354	6.6767	1.3233	8	2.7294	0.0039	0.3821	0.2092	0.0071	0.7682	4.1		0.0039	0.0334	1.7142	1.7515	4	19.8767	0.785963	16Ca107.
16Ca107.	31	49.7909	25.3982	0.0968	0.682	3.6537	3.4078	0.0555	0.0056		0.0741	10.1801	4.3857	97.7332	6.8081	1.1919	8	2.901	0.01	0.0702	0.4178	0.0064	0.6946	4.1		0.0008	0.0197	1.7758	1.7962	4	19.8986	0.624416	16Ca107.
16Ca107.	12	49.1042	27.624	0.0784	1.2455	3.0385	2.9269	0.0659	0.0126		0.1105	10.2669	4.4414	98.9292	6.63	1.37	8	3.0257	0.008	0.1265	0.3431	0.0075	0.5891	4.1		0.0018	0.0289	1.7684	1.7992	4	19.9019	0.631946	16Ca107.
16Ca107.	13	47.7307	26.4582	0.1068	0.7173	3.0687	3.0164	0.0103	0.0546		0.3181	10.3813	4.2921	96.1544	6.6686	1.3314	8	3.0253	0.0112	0.0754	0.3586	0.0012	0.6283	4.1		0.0082	0.0862	1.8503	1.9447	4	19.9723	0.63664	16Ca107.
16Ca107.	15	49.9064	27.5692	0.1018	0.7676	3.3811	3.0197	0.0762	0.0168		0	10.4451	4.4825	99.7999	6.6765	1.3235	8	3.0233	0.0102	0.0773	0.3783	0.0086	0.6022	4.1		0.0024	0	1.7826	1.7851	4	19.8979	0.614176	16Ca107.
16Ca107.	16	50.3022	27.8488	0.1568	0	3.6382	3.0015	0.0788	0.0616		0.2966	11.0077	4.502	100.97	6.7003	1.2997	8	3.0722	0.0157	0	0.4053	0.0089	0.596	4.0981		0.0088	0.0766	1.8705	1.9559	4	19.9943	0.595226	16Ca107.
16Ca107.	17	49.5106	27.7978	0.1151	1.1045	2.8412	3.1574	0.0633	0.084		0.3289	10.6523	4.4765	100.132	6.6324	1.3676	8	3.0211	0.0116	0.1113	0.3183	0.0072	0.6305	4.1		0.012	0.0854	1.8204	1.9179	4	19.9589	0.664524	16Ca107.
16Ca107.	18	48.4752	27.828	0.1051	0.8823	2.9769	2.8506	0.0077	0.0042		0	10.9402	4.3989	98.5802	6.6082	1.3918	8	3.0791	0.0108	0.0905	0.3394	0.0009	0.5793	4.1		0.0006	0	1.9026	1.9032	4	19.9696	0.630565	16Ca107.
16Ca107.	20	49.9599	26.9192	0.0634	0	3.8788	2.7975	0.0232	0		0.2089	10.4632	4.4272	98.9314	6.7671	1.2329	8	3.0644	0.0065	0	0.4394	0.0027	0.5649	4.0778		0	0.0549	1.808	1.8629	4	19.962	0.562481	16Ca107.
16Ca107.	21	49.5641	27.248	0.0601	0.2376	3.6405	2.97	0.0284	0		0.2197	9.8127	4.4305	98.2744	6.7085	1.2915	8	3.0551	0.0061	0.0242	0.4121	0.0033	0.5993	4.1		0	0.0577	1.6944	1.752	4	19.8861	0.592545	16Ca107.
16Ca107.	23	49.9706	27.0212	0.0701	0	3.534	2.9169	0.0504	0.0056		0	10.5499	4.4308	98.6035	6.7631	1.2369	8	3.0733	0.0071	0	0.4	0.0058	0.5885	4.0747		0.0008	0	1.8215	1.8224	4	19.9203	0.595346	16Ca107.
16Ca107.	24	50.3065	27.9867	0.0834	0	3.2098	2.8589	0.0504	0		0.3276	10.244	4.489	99.641	6.7202	1.2798	8	3.1264	0.0084	0	0.3586	0.0057	0.5693	4.0684		0	0.0848	1.7458	1.8306	4	19.9287	0.613536	16Ca107.
16Ca107.	26	48.9266	27.2083	0.0818	0.1458	3.6589	2.8406	0.0181	0		0.1766	10.3873	4.3847	97.9046	6.6913	1.3087	8	3.0769	0.0084	0.015	0.4185	0.0021	0.5791	4.1		0	0.0468	1.8123	1.8591	4	19.9419	0.580493	16Ca107.
16Ca107.	27	48.9737	28.0567	0.1151	1.504	2.6091	2.9899	0.0581	0		0.1766	10.5981	4.4577	99.6178	6.5881	1.4119	8	3.0363	0.0117	0.1522	0.2935	0.0066	0.5996	4.1		0	0.0461	1.8188	1.8649	4	19.945	0.671369	16Ca107.
16Ca107.	29	49.179	28.6462	0.1852	2.4777	2.245	2.9617	0.0504	0.0154		0	11.1149	4.5238	101.436	6.5192	1.4808	8	2.9946	0.0185	0.2472	0.2489	0.0057	0.5853	4.1		0.0022	0	1.8796	1.8818	4	19.9467	0.70163	16Ca107.
16Ca107.	30	50.345	28.0434	0.1652	0	3.7527	2.9534	0.0232	0.0056		0.1766	10.945	4.514	100.924	6.6882	1.3118	8	3.079	0.0165	0	0.4169	0.0026	0.5849	4.0999		0.0008	0.0455	1.8549	1.9012	4	19.951	0.583849	16Ca107.
16Ca107.	31	50.1567	26.8172	0.6741	0	3.9637	2.9584	0.0232	0.5653		0	10.3235	4.4684	99.9548	6.7311	1.2689	8	2.9727	0.0681	0	0.4449	0.0026	0.5919	4.0801		0.0813	0	1.7674	1.8487	4	19.9657	0.570891	16Ca107.
Metapelite	lab#	SiO2	Al2O3	TiO2	Fe2O3*	FeO*	MgO	MnO	CaO	BaO	Na2O	K2O	H2O'	sum	Si	Alt	sum	Alo	Ti	Fe3+	Fe2+	Mn	Mg	sum	Ba	Ca	Na	K	sum	OH	O*		Metapelite
10Ca49.	12	52.8651	27.1006	0.2086	0	2.5177	3.7925	0.031	0.0252	0.1362	0.1348	10.6403	4.6185	102.07	6.8639	1.1361	8	3.011	0.0204	0	0.2734	0.0034	0.7341	4.0422	0.0069	0.0035	0.0339	1.7624	1.7999	4	19.9086	0.728635	10Ca49.
10Ca49.	13	53.0598	27.144	0.1435	0	2.1343	3.7311	0.0684	0.0238	0.1061	0.1038	10.3921	4.6182	101.525	6.8897	1.1103	8	3.0437	0.014	0	0.2318	0.0075	0.7222	4.0193	0.0054	0.0033	0.0261	1.7215	1.7509	4	19.8825	0.757023	10Ca49.
10Ca49.	14	53.2759	27.3783	0.1618	0	2.1896	3.6582	0.0142	0.0168	0.163	0.1146	10.574	4.64	102.186	6.8852	1.1148	8	3.0553	0.0157	0	0.2367	0.0016	0.7048	4.014	0.0083	0.0023	0.0287	1.7433	1.7744	4	19.8966	0.748593	10Ca49.
10Ca49.	15	53.2074	27.3065	0.1618	0	2.2591	3.7278	0.0607	0.0182	0.1262	0.1065	10.4295	4.6383	102.042	6.879	1.121	8	3.0398	0.0157	0	0.2443	0.0066	0.7185	4.0249	0.0064	0.0025	0.0267	1.7202	1.7494	4	19.8823	0.746261	10Ca49.
10Ca49.	16	52.2019	27.7184	0.1568	0	2.2411	3.6068	0.0542	0.0056	0.1619	0.1105	10.7138	4.5957	101.567	6.8115	1.1885	8	3.0742	0.0154	0	0.2446	0.006	0.7016	4.0417	0.0083	0.0008	0.028	1.7834	1.8122	4	19.9148	0.741492	10Ca49.
10Ca49.	17	53.3935	28.034	0.1068	0	1.9465	3.5421	0.0103	0.0028	0.1597	0.2561	10.2199	4.6667	102.338	6.861	1.139	8	3.1067	0.0103	0	0.2092	0.0011	0.6785	4.0058	0.008	0.0004	0.0638	1.6753	1.7395	4	19.878	0.764335	10Ca49.
10Ca49.	18	53.9198	25.9612	0.0784	0	2.2501	4.1755	0.0684	0.0308	0.1496	0.1065	10.5487	4.6265	101.916	6.9888	1.0112	8	2.9547	0.0076	0	0.2439	0.0075	0.8068	4.0206	0.0076	0.0043	0.0268	1.7443	1.7753	4	19.8974	0.767869	10Ca49.
10Ca49.	19	53.5198	26.6584	0.1085	0	2.1459	3.7858	0.0374	0	0.1061	0.0674	10.4933	4.6203	101.543	6.9463	1.0537	8	3.0241	0.0106	0	0.2329	0.0041	0.7325	4.0042	0.0054	0	0.017	1.7374	1.7544	4	19.8826	0.758753	10Ca49.
10Ca49.	20	54.7606	25.315	0.1251	0	2.3028	4.2485	0.0065	0	0.1217	0.1308	10.256	4.6468	101.914	7.0669	0.9331	8	2.9171	0.0121	0	0.2485	0.0007	0.8173	3.9959	0.0062	0	0.0327	1.6885	1.7212	4	19.8667	0.766842	10Ca49.
10Ca49.	21	53.37	26.0047	0.0984	0	2.1755	3.9484	0.0077	0.0252	0.1027	0.089	10.0597	4.5852	100.466	6.9798	1.0202	8	2.9881	0.0097	0	0.2379	0.0009	0.7698	4.0064	0.0053	0.0035	0.0226	1.6784	1.7045	4	19.8593	0.763918	10Ca49.
10Ca49.	22	53.7102	27.1478	0.1168	0	1.7921	3.7809	0.0245	0	0.1407	0.2008	10.4259	4.6473	101.987	6.9305	1.0695	8	3.0591	0.0113	0	0.1934	0.0027	0.7273	3.9938	0.0071	0	0.0502	1.7163	1.7665	4	19.8904	0.789942	10Ca49.
10Ca49.	23	53.4449	26.6811	0.0984	0	2.5267	3.8903	0	0.0266	0.1429	0.1065	10.6222	4.6294	102.169	6.923	1.077	8	2.9962	0.0096	0	0.2737	0	0.7512	4.0308	0.0073	0.0037	0.0267	1.7553	1.7858	4	19.902	0.73295	10Ca49.
10Ca49.	41	52.8031	27.4048	0.1852	0	2.4212	3.7792	0	0.0014	0.1362	0.0863	10.6439	4.6257	102.087	6.8452	1.1548	8	3.0323	0.0181	0	0.2625	0	0.7304	4.0432	0.0069	0.0002	0.0217	1.7603	1.7822	4	19.8981	0.735623	10Ca49.
10Ca49.	42	53.1839	27.0137	0.1385	0	2.335	3.8323	0.0194	0.0112	0.1016	0.1227	10.7836	4.6264	102.168	6.8936	1.1064	8	3.0203	0.0135	0	0.2531	0.0021	0.7405	4.0296	0.0052	0.0016	0.0308	1.7832	1.8155	4	19.9137	0.74527	10Ca49.
10Ca49.	43	51.7847	27.3065	0.1468	0.7399	2.4372	4.1324	0.0116	0.0462	0.1373	0.1415	10.415	4.6012	101.901	6.749	1.251	8	2.9432	0.0144	0.0726	0.2656	0.0013	0.8029	4.1	0.007	0.0064	0.0358	1.7316	1.7738	4	19.8939	0.751427	10Ca49.
10Ca49.	44	51.3954	28.3457	0.1919	0	2.4199	3.421	0.0542	0.0056	0.2043	0.1631	10.7234	4.5792	101.504	6.7305	1.2695	8	3.1054	0.0189	0	0.265	0.006	0.6679	4.0632	0.0105	0.0008	0.0414	1.7915	1.8337	4	19.9277	0.71594	10Ca49.
10Ca49.	45	53.3165	27.0193	0.1051	0	2.169	3.7212	0	0.0168	0.1262	0.1955	10.5523	4.6237	101.846	6.9149	1.0851	8	3.0449	0.0103	0	0.2353	0	0.7195	4.0099	0.0064	0.0023	0.0491	1.7459	1.7974	4	19.9063	0.753561	10Ca49.
16Ca70.	53	45.9273	32.1058	0.3237	0.0904	3.7125	0.9038	0.0116	0	0.2769	0.5783	10.5319	4.388	98.85	6.2765	1.7235	8	3.4476	0.0333	0.0093	0.4243	0.0013	0.1841	4.1	0.0148	0	0.1532	1.8362	1.9894	4	20.0095	0.302597	16Ca70.
16Ca70.	54	45.7796	32.7406	0.3003	0.2147	3.3987	0.8474	0.0336	0.0014	0.2948	0.6174	10.6945	4.4052	99.3282	6.2318	1.7682	8	3.4845	0.0308	0.022	0.3869	0.0039	0.172	4.1	0.0157	0.0002	0.1629	1.8572	2.0203	4	20.0259	0.307747	16Ca70.
16Ca70.	55	45.7604	31.4728	0.292	0.0126	3.7967	0.99	0	0	0.3271	0.6012	10.7716	4.348	98.3723	6.3112	1.6888	8	3.4269	0.0303	0.0013	0.4379	0	0.2035	4.1	0.0177	0	0.1608	1.8952	2.056	4	20.0457	0.317275	16Ca70.
16Ca70.	56	46.1519	32.3401	0.322	0.0575	3.7241	0.8905	0.0245	0.0014	0.2992	0.6457	10.5776	4.4115	99.4461	6.2735	1.7265	8	3.4545	0.0329	0.0059	0.4234	0.0028	0.1805	4.1	0.0159	0.0002	0.1702	1.8343	2.0047	4	20.0183	0.298891	16Ca70.
16Ca70.	57	45.3325	32.2626	0.3537	0	3.5108	0.8159	0.0026	0.014	0.2668	0.6201	10.7138	4.3515	98.2443	6.2471	1.7529	8	3.487	0.0367	0	0.4046	0.0003	0.1676	4.0962	0.0144	0.0021	0.1657	1.8835	2.0513	4	20.0411	0.292905	16Ca70.
16Ca70.	58	45.816	32.4194	0.3654	0.2208	3.437	0.9452	0	0	0.316	0.6376	10.7294	4.3983	99.2851	6.2465	1.7535	8	3.4559	0.0375	0.0227	0.3919	0	0.1921	4.1	0.0169	0	0.1685	1.8662	2.0347	4	20.0342	0.328938	16Ca70.
16Ca70.	59	46.1711	31.9754	0.3487	0	3.6601	0.9452	0	0	0.3193	0.616	10.7342	4.3937	99.1638	6.3016	1.6984	8	3.445	0.0358	0	0.4178	0	0.1923	4.0909	0.0171	0	0.163	1.869	2.032	4	20.0331	0.315194	16Ca70.
16Ca70.	60	45.8567	31.9187	0.3704	0	3.3436	0.9651	0.0284	0.007	0.2881	0.643	10.509	4.3678	98.2977	6.2958	1.7042	8	3.4606	0.0383	0	0.3839	0.0033	0.1975	4.0836	0.0155	0.001	0.1712	1.8406	2.0128	4	20.0224	0.339697	16Ca70.
16Ca70.	61	46.0535	32.4742	0.4021	0	3.471	0.8126	0	0.0042	0.3026	0.6659	10.5126	4.4043	99.1029	6.2704	1.7296	8	3.4815	0.0412	0	0.3952	0	0.1649	4.0829	0.0161	0.0006	0.1758	1.826	2.0024	4	20.0177	0.294412	16Ca70.
16Ca70.	62	45.9551	31.4993	0.317	0.1561	3.8181	1.0066	0.031	0.0504	0.2523	0.5405	10.6692	4.3689	98.6644	6.3077	1.6923	8	3.4033	0.0327	0.0161	0.4383	0.0036	0.206	4.1	0.0136	0.0074	0.1438	1.8682	2.0195	4	20.0233	0.319727	16Ca70.
16Ca70.	63	45.7711	32.1681	0.3187	0	3.7643	0.8441	0	0.0336	0.3026	0.6686	10.6114	4.3775	98.8598	6.2701	1.7299	8	3.4637	0.0328	0	0.4313	0	0.1724	4.1002	0.0162	0.0049	0.1776	1.8545	2.037	4	20.0372	0.285572	16Ca70.
16Ca70.	64	46.0428	32.3665	0.2119	0.3534	3.5853	0.8822	0	0.0028	0.3673	0.9854	10.3235	4.4072	99.5282	6.2648	1.7352	8	3.4552	0.0217	0.0362	0.408	0	0.1789	4.1	0.0196	0.0004	0.26	1.792	2.0523	4	20.0458	0.304822	16Ca70.
16Ca70.	65	45.831	32.1795	0.3454	0.0706	3.7509	0.8623	0	0.0168	0.2836	0.5958	10.6596	4.3856	98.981	6.2667	1.7333	8	3.4525	0.0355	0.0073	0.4289	0	0.1758	4.1	0.0152	0.0025	0.158	1.8594	2.0198	4	20.0251	0.290723	16Ca70.
16Ca70.	66	45.5657	32.2664	0.3153	0.1378	3.5567	0.849	0.0207	0	0.3852	0.6821	10.6174	4.3708	98.767	6.2516	1.7484	8	3.4691	0.0325	0.0142	0.4081	0.0024	0.1737	4.1	0.0207	0	0.1814	1.8584	2.0398	4	20.0406	0.298556	16Ca70.
16Ca70.	67	45.6106	32.8502	0.3787	0.3881	3.1681	0.8872	0.0452	0	0.2847	0.6726	10.6716	4.4065	99.3636	6.207	1.793	8	3.4757	0.0388	0.0397	0.3606	0.0052	0.18	4.1	0.0152	0	0.1775	1.8527	2.0302	4	20.0303	0.332963	16Ca70.
16Ca70.	68	46.5883	31.5559	0.2937	0.0629	3.8427	1.1276	0.0129	0	0.3405	0.6416	10.5126	4.4085	99.3873	6.3373	1.6628	8	3.3962	0.0301	0.0064	0.4372	0.0015	0.2287	4.1	0.0182	0	0.1692	1.8243	1.9935	4	20.0149	0.343445	16Ca70.
16Ca70.	69	46.4214	31.3065	0.292	0.0335	3.8705	1.1343	0.022	0	0.3182	0.6915	10.3211	4.3865	98.7974	6.3462	1.6538	8	3.3903	0.03	0.0034	0.4425	0.0025	0.2312	4.1	0.017	0	0.1833	1.8	1.9833	4	20.0087	0.343179	16Ca70.
16Ca70.	70	46.6696	31.0666	0.2703	0.0074	3.9493	1.2122	0.0245	0.0056	0.345	0.6726	10.4114	4.3921	99.0267	6.3719	1.6281	8	3.371	0.0278	0.0008	0.4509	0.0028	0.2467	4.1	0.0185	0.0008	0.1781	1.8134	1.9923	4	20.0146	0.353641	16Ca70.
16Ca70.	71	46.1947	31.2347	0.2569	0.3171	3.7247	1.1426	0	0.0056	0.3595	0.6376	10.3476	4.374	98.5949	6.3333	1.6667	8	3.3802	0.0265	0.0327	0.4271	0	0.2335	4.1	0.0193	0.0008	0.1695	1.8098	1.9801	4	20.0094	0.353467	16Ca70.
16Ca70.	72	46.3038	31.3783	0.2569	0	3.8904	1.048	0	0	0.335	0.7872	10.521	4.3771	98.8977	6.3437	1.6563	8	3.4103	0.0265	0	0.4457	0	0.214	4.0965	0.018	0	0.2091	1.8388	2.0479	4	20.042	0.32439	16Ca70.
16Ca70.	81	46.7808	30.9891	0.3204	0.1576	3.8489	1.3233	0	0.0252	0.3316	0.6214	10.6668	4.4036	99.4687	6.3705	1.6295	8	3.3441	0.0328	0.0162	0.4383	0	0.2686	4.1	0.0177	0.0037	0.1641	1.8531	2.0208	4	20.0281	0.379969	16Ca70.
16Ca70.	82	45.0844	31.7524	0.3287	0.2669	3.4958	0.8905	0	0	0.2769	0.5877	10.2319	4.3219	97.2371	6.2555	1.7445	8	3.448	0.0343	0.0279	0.4057	0	0.1842	4.1	0.0151	0	0.1581	1.8111	1.9693	4	19.9997	0.312256	16Ca70.
16Ca70.	83	45.6149	32.4062	0.4038	0.4453	3.5733	0.8076	0.0271	0.0588	0.2992	0.6255	10.5523	4.394	99.208	6.2252	1.7748	8	3.4375	0.0415	0.0457	0.4078	0.0031	0.1643	4.1	0.016	0.0086	0.1655	1.8372	2.0113	4	20.0217	0.287188	16Ca70.
16Ca70.	84	46.5412	31.9489	0.2536	0.1695	3.806	1.0298	0	0.0196	0.3193	0.6565	10.5957	4.4223	99.7624	6.3111	1.6889	8	3.417	0.0259	0.0173	0.4316	0	0.2082	4.1	0.017	0.0028	0.1726	1.833	2.0084	4	20.0212	0.325414	16Ca70.
16Ca70.	85	46.0749	31.6391	0.2753	0.178	3.5899	1.1243	0	0.0294	0.3316	0.7077	10.5307	4.3802	98.8611	6.3078	1.6922	8	3.4128	0.0284	0.0183	0.411	0	0.2295	4.1	0.0178	0.0043	0.1878	1.8392	2.0314	4	20.0335	0.358314	16Ca70.
16Ca70.	86	45.7732	31.6788	0.2937	0.4693	3.4269	1.0646	0.0181	0	0.3461	0.616	10.5319	4.3687	98.5872	6.283	1.717	8	3.4079	0.0303	0.0485	0.3934	0.0021	0.2178	4.1	0.0186	0	0.1639	1.8443	2.0082	4	20.0227	0.356348	16Ca70.
16Ca70.	88	46.0192	32.3627	0.3521	0	3.5855	0.9071	0.0077	0.0168	0.2981	0.6133	10.5403	4.4015	99.1043	6.2697	1.7303	8	3.4662	0.0361	0	0.4085	0.0009	0.1842	4.0959	0.0159	0.0025	0.162	1.832	1.9964	4	20.0154	0.310781	16Ca70.
16Ca70.	89	46.0107	30.4978	0.262	0.8863	3.3695	1.3731	0.0362	0.007	0.2255	0.5163	10.4186	4.347	97.9499	6.3471	1.6529	8	3.3055	0.0272	0.092	0.3887	0.0042	0.2824	4.1	0.0122	0.001	0.1381	1.8335	1.9726	4	19.9985	0.420802	16Ca70.
16Ca70.	91	47.7414	31.5503	0.322	0	3.9354	0.8026	0.0026	0.0546	0.2635	0.6403	10.3415	4.4613	100.115	6.4171	1.5829	8	3.4152	0.0326	0	0.4424	0.0003	0.1608	4.0513	0.0139	0.0079	0.1669	1.7733	1.948	4	19.9918	0.266578	16Ca70.
16Ca71.	4	46.062	33.4284	0.3437	2.0832	2.4173	1.0066	0.0181	0.0014		0.7549	9.6067	4.5011	100.273	6.1366	1.8634	8	3.3854	0.0344	0.2088	0.2693	0.002	0.1999	4.1		0.0002	0.195	1.6328	1.8279	4	19.9218	0.426044	16Ca71.
16Ca71.	5	45.0437	32.8842	0.267	0.7209	2.9664	0.8175	0	0.0224		0.5796	9.7212	4.3733	97.3961	6.1765	1.8235	8	3.4908	0.0275	0.0744	0.3402	0	0.1671	4.1		0.0033	0.1541	1.7005	1.8579	4	19.929	0.329391	16Ca71.
16Ca71.	8	45.4117	34.9116	0.342	0.6779	2.6398	0.5771	0.0155	0		0.8748	10.0982	4.4805	100.029	6.0779	1.9221	8	3.5849	0.0344	0.0683	0.2955	0.0018	0.1151	4.1		0	0.227	1.7242	1.9512	4	19.9756	0.280321	16Ca71.
16Ca71.	9	45.1742	33.8497	0.3938	0.1839	2.9903	0.6782	0.0387	0.021		0.8546	10.0476	4.4131	98.6979	6.1384	1.8616	8	3.5593	0.0403	0.0188	0.3398	0.0045	0.1374	4.1		0.0031	0.2252	1.7417	1.9699	4	19.9935	0.28793	16Ca71.
16Ca71.	10	46.2567	33.9423	0.3087	0.9222	2.8869	0.859	0.0207	0.0406		0.5904	9.8778	4.5049	100.249	6.1575	1.8425	8	3.4825	0.0309	0.0924	0.3214	0.0023	0.1705	4.1		0.0058	0.1524	1.6774	1.8356	4	19.924	0.346615	16Ca71.
16Ca71.	11	46.0706	34.2428	0.3487	0.0867	3.2759	0.6202	0.062	0.0028		0.4394	10.103	4.4837	99.7987	6.1616	1.8384	8	3.5591	0.0351	0.0087	0.3664	0.007	0.1237	4.1		0.0004	0.1139	1.7238	1.8381	4	19.929	0.252397	16Ca71.
16Ca71.	12	44.5752	32.8672	0.3787	4.1697	1.268	1.121	0	0.0154		0.4677	9.7838	4.4339	99.1405	6.0287	1.9713	8	3.2677	0.0385	0.4244	0.1434	0	0.226	4.1		0.0022	0.1227	1.6881	1.813	4	19.9161	0.611803	16Ca71.
16Ca71.	13	46.1818	33.9858	0.4255	0.3513	3.1896	0.7479	0.031	0		0.7495	10.3837	4.4915	100.586	6.1658	1.8342	8	3.5135	0.0427	0.0353	0.3561	0.0035	0.1489	4.1		0	0.194	1.7686	1.9626	4	19.9889	0.294851	16Ca71.
16Ca71.	14	46.0963	32.3741	0.3838	1.139	3.0096	1.1193	0.0258	0.0308		0.6039	10.1127	4.4407	99.3359	6.2247	1.7753	8	3.3771	0.039	0.1157	0.3399	0.003	0.2253	4.1		0.0045	0.1581	1.7421	1.9047	4	19.9523	0.39862	16Ca71.
16Ca71.	15	45.5914	33.8233	0.3637	0.7549	2.9397	0.728	0	0		0.5365	10.5945	4.4524	99.8369	6.1404	1.8596	8	3.5094	0.0369	0.0765	0.3311	0	0.1462	4.1		0	0.1401	1.8204	1.9604	4	19.9886	0.306306	16Ca71.
16Ca71.	34	45.3646	34.8946	0.332	0	3.0155	0.4693	0.0026	0.0056		0.8506	10.1368	4.4587	99.5712	6.1013	1.8987	8	3.6324	0.0336	0	0.3392	0.0003	0.0941	4.0996		0.0008	0.2218	1.7392	1.9618	4	19.9879	0.217171	16Ca71.
16Ca71.	35	45.846	34.2069	0.2369	0.4561	3.0644	0.6699	0.0052	0.0518		0.674	10.1295	4.4726	99.8805	6.1468	1.8532	8	3.552	0.0239	0.046	0.3436	0.0006	0.1339	4.1		0.0074	0.1752	1.7326	1.9152	4	19.9683	0.280419	16Ca71.
16Ca71.	36	45.8096	33.5852	0.2636	0.1323	3.1486	0.8126	0.0284	0.0462		0.7899	10.0223	4.4385	99.1167	6.1892	1.8108	8	3.5371	0.0268	0.0135	0.3558	0.0033	0.1637	4.1		0.0067	0.2069	1.7274	1.941	4	19.9768	0.315111	16Ca71.
16Ca71.	37	49.2518	29.0883	0.2386	0.0078	4.4636	1.9999	0.093	0		0.3788	10.6162	4.4857	100.628	6.5841	1.4159	8	3.1671	0.024	0.0008	0.499	0.0105	0.3986	4.1		0	0.0982	1.8105	1.9087	4	19.955	0.444073	16Ca71.
16Ca71.	38	48.8047	28.956	0.327	0.7201	3.9423	2.1541	0.031	0		0.0431	10.5981	4.4729	100.049	6.5431	1.4569	8	3.1183	0.033	0.0727	0.442	0.0035	0.4305	4.1		0	0.0112	1.8126	1.8238	4	19.9119	0.49341	16Ca71.
16Ca71.	39	45.5529	33.5285	0.2937	0.2008	3.2479	0.66	0.0801	0.0168		0.74	10.4632	4.4211	99.2209	6.1787	1.8213	8	3.5385	0.03	0.0205	0.3684	0.0092	0.1335	4.1		0.0024	0.1946	1.8105	2.0076	4	20.0064	0.265989	16Ca71.
16Ca71.	45	46.0192	33.4019	0.2987	0.0002	3.3537	0.8308	0	0.0308		0.6322	10.4271	4.4432	99.5401	6.2109	1.7891	8	3.524	0.0303	0	0.3785	0	0.1672	4.1		0.0045	0.1654	1.7953	1.9652	4	19.999	0.306395	16Ca71.
16Ca71.	46	45.2427	33.6835	0.3737	0.8184	2.7256	0.7777	0.0232	0		0.5891	10.1452	4.4255	98.8177	6.1305	1.8695	8	3.5098	0.0381	0.0835	0.3089	0.0027	0.1571	4.1		0	0.1548	1.7538	1.9085	4	19.9564	0.337124	16Ca71.
16Ca71.	47	45.3689	33.5701	0.2786	0.8539	2.6692	0.8441	0.0258	0		0.7603	10.3427	4.4256	99.1844	6.1475	1.8525	8	3.5086	0.0284	0.0871	0.3025	0.003	0.1705	4.1		0	0.1997	1.7879	1.9876	4	20.0011	0.360465	16Ca71.
16Ca71.	48	45.8224	33.6287	0.342	0.0149	3.4241	0.6666	0.0181	0		0.856	10.3572	4.4404	99.5704	6.1883	1.8118	8	3.5407	0.0348	0.0015	0.3867	0.0021	0.1342	4.1		0	0.2241	1.7844	2.0085	4	20.0043	0.257631	16Ca71.
16Ca71.	52	45.1057	32.8937	0.2987	0.684	3.1476	0.7429	0	0.028		0.6025	10.1464	4.3787	98.072	6.1773	1.8227	8	3.4866	0.0308	0.0705	0.3605	0	0.1517	4.1		0.0041	0.16	1.7727	1.9368	4	19.9755	0.296173	16Ca71.
16Ca71.	53	45.9337	34.084	0.2903	0	3.1442	0.6915	0	0		0.6619	10.3271	4.461	99.5936	6.1747	1.8253	8	3.5746	0.0294	0	0.3535	0	0.1386	4.096		0	0.1725	1.771	1.9435	4	19.9718	0.28165	16Ca71.
16Ca71.	54	44.864	33.8705	0.2519	0.3892	2.884	0.5754	0.062	0		0.7913	10.2114	4.3903	98.296	6.1279	1.8721	8	3.5803	0.0259	0.04	0.3294	0.0072	0.1172	4.1		0	0.2095	1.7793	1.9889	4	19.9954	0.262427	16Ca71.
16Ca71.	55	45.5208	34.5129	0.2252	0.4814	2.8397	0.6086	0.0052	0		0.7697	10.2235	4.4611	99.67	6.119	1.881	8	3.5867	0.0228	0.0487	0.3192	0.0006	0.122	4.1		0	0.2006	1.7532	1.9538	4	19.9804	0.276519	16Ca71.
16Ca71.	56	45.6363	34.5923	0.2503	0.221	2.9685	0.5937	0	0		0.9813	10.2006	4.4667	99.9106	6.1268	1.8732	8	3.6003	0.0253	0.0223	0.3333	0	0.1188	4.1		0	0.2554	1.7471	2.0025	4	20.0013	0.262774	16Ca71.
16Ca71.	57	44.8619	33.4208	0.297	2.4412	1.942	0.9054	0.0413	0		0.4098	10.2813	4.4266	99.0274	6.0773	1.9227	8	3.4133	0.0303	0.2489	0.22	0.0047	0.1828	4.1		0	0.1076	1.7768	1.8844	4	19.9422	0.453823	16Ca71.
16Ca71.	58	46.2182	34.2314	0.3487	0.1389	3.3099	0.665	0	0		0.8357	10.4355	4.4945	100.714	6.1666	1.8334	8	3.5495	0.035	0.014	0.3693	0	0.1323	4.1		0	0.2162	1.7762	1.9924	4	20.002	0.263756	16Ca71.
10Ca71.	61	45.4865	33.5266	0.1935	1.0467	2.5742	0.9004	0.0413	0.0392		0.5257	9.9356	4.4337	98.7036	6.1521	1.8479	8	3.4963	0.0197	0.1065	0.2912	0.0047	0.1816	4.1		0.0057	0.1379	1.7143	1.8579	4	19.9289	0.384095	10Ca71.
16Ca71.	32	46.6632	31.7865	0.2886	0.1261	3.7885	1.116	0	0.0042		0.5756	10.4524	4.4241	99.2807	6.3249	1.6751	8	3.4027	0.0294	0.0129	0.4295	0	0.2255	4.1		0.0006	0.1513	1.8074	1.9593	4	19.9886	0.344275	16Ca71.
16Ca71.	34	46.4985	33.007	0.282	0.1673	3.561	0.8689	0.0439	0.0182		0.6875	10.3861	4.4627	100.047	6.2481	1.7519	8	3.4753	0.0285	0.0169	0.4002	0.005	0.1741	4.1		0.0026	0.1791	1.7804	1.9621	4	19.9913	0.303152	16Ca71.
16Ca71.	39	46.2225	33.5342	0.4021	0.1739	3.2849	0.8407	0.0349	0		0.6969	10.5752	4.4707	100.363	6.2	1.8	8	3.5013	0.0406	0.0175	0.3685	0.004	0.1681	4.1		0	0.1812	1.8096	1.9909	4	20.0157	0.313269	16Ca71.
16Ca71.	40	46.3081	33.298	0.3354	0.7171	3.1216	0.8938	0.0684	0		0.7293	10.5379	4.4774	100.487	6.2021	1.7979	8	3.4581	0.0338	0.0723	0.3496	0.0078	0.1785	4.1		0	0.1894	1.8005	1.9899	4	19.9949	0.338004	16Ca71.
16Ca71.	41	44.5367	32.0019	0.3053	2.5454	2.0515	1.0911	0.0736	0		0.3734	10.25	4.3515	97.6549	6.1375	1.8625	8	3.3352	0.0317	0.264	0.2364	0.0086	0.2242	4.1		0	0.0998	1.802	1.9018	4	19.9631	0.486756	16Ca71.
16Ca71.	42	45.4887	32.4024	0.2586	1.1629	3.2287	0.796	0.0349	0		0.3842	10.5186	4.3941	98.7464	6.2079	1.7921	8	3.4196	0.0266	0.1194	0.3685	0.004	0.1619	4.1		0	0.1017	1.8313	1.9329	4	19.979	0.305241	16Ca71.
16Ca71.	43	45.0437	32.9957	0.282	0.8434	3.089	0.6932	0	0.0014		0.341	10.6258	4.3808	98.296	6.1658	1.8342	8	3.489	0.029	0.0869	0.3536	0	0.1414	4.1		0.0002	0.0905	1.8556	1.9463	4	19.9731	0.285657	16Ca71.
16Ca71.	44	45.1763	31.9338	0.322	0.7686	3.2181	0.9402	0	0		0.5688	10.4873	4.3476	97.8199	6.2311	1.7689	8	3.4223	0.0334	0.0798	0.3712	0	0.1933	4.1		0	0.1521	1.8453	1.9975	4	20.0081	0.342427	16Ca71.
16Ca71.	51	47.397	30.1861	0.3387	0.7403	3.5575	1.7362	0	0.0014		0.7171	10.0187	4.4281	99.121	6.4187	1.5813	8	3.2366	0.0345	0.0754	0.4029	0	0.3505	4.1		0.0002	0.1883	1.7309	1.9194	4	19.9597	0.465224	16Ca71.
16Ca71.	52	46.6161	30.4506	0.3254	2.0442	2.6582	1.7677	0.062	0.0644		0.833	9.6959	4.4206	98.9643	6.3236	1.6764	8	3.192	0.0332	0.2087	0.3016	0.0071	0.3575	4.1		0.0094	0.2191	1.6779	1.9064	4	19.9574	0.542406	16Ca71.
16Ca71.	53	46.1455	33.8138	0.2236	0.4931	3.3296	0.6467	0.0271	0		0.8357	10.2693	4.4756	100.307	6.1828	1.8172	8	3.5224	0.0225	0.0497	0.3731	0.0031	0.1292	4.1		0	0.2171	1.7553	1.9724	4	19.9936	0.257217	16Ca71.
16Ca71.	54	46.7787	33.2583	0.3737	0.4641	3.5976	0.8308	0.022	0.0126		0.5891	10.5102	4.5036	100.941	6.2288	1.7712	8	3.4481	0.0374	0.0465	0.4006	0.0025	0.1649	4.1		0.0018	0.1521	1.7853	1.9392	4	19.9696	0.2916	16Ca71.
16Ca71.	55	46.1604	33.0127	0.3153	0.8056	3.0587	0.9867	0	0		0.6807	10.5042	4.4574	100.058	6.2101	1.7899	8	3.4445	0.0319	0.0816	0.3441	0	0.1979	4.1		0	0.1776	1.8028	1.9804	4	20.0023	0.365129	16Ca71.
16Ca71.	63	46.4942	32.9787	0.4054	0.2207	3.5773	0.9087	0	0.0266		0.6106	10.456	4.4692	100.184	6.2384	1.7616	8	3.4536	0.0409	0.0223	0.4014	0	0.1818	4.1		0.0038	0.1589	1.7898	1.9525	4	19.982	0.311728	16Ca71.
16Ca71.	64	45.5358	32.4289	0.3237	0.8519	3.1186	0.9303	0.0245	0		0.7656	10.4945	4.3937	98.8676	6.2148	1.7852	8	3.4312	0.0332	0.0875	0.356	0.0028	0.1893	4.1		0	0.2026	1.8273	2.0299	4	20.0149	0.347148	16Ca71.
16Ca71.	66	43.9484	32.8748	0.3754	1.7001	2.2165	0.8208	0.0142	0.0042		0.7764	10.4222	4.3287	97.5213	6.0882	1.9118	8	3.4557	0.0391	0.1772	0.2568	0.0017	0.1695	4.1		0.0006	0.2085	1.8419	2.0511	4	20.032	0.397607	16Ca71.
16Ca71.	68	43.8457	31.8715	0.3487	1.6967	2.3971	0.932	0.0374	0.0056		0.3532	10.6355	4.2806	96.4536	6.1423	1.8577	8	3.4045	0.0368	0.1789	0.2808	0.0044	0.1946	4.1		0.0008	0.0959	1.9007	1.9975	4	20.007	0.40934	16Ca71.
16Ca72.	1	45.5678	33.6136	0.2336	0	3.4337	0.5323	0	0.0112	0.2479	0.8115	10.6861	4.414	99.5515	6.1906	1.8094	8	3.5727	0.0239	0	0.3901	0	0.1078	4.0945	0.0132	0.0016	0.2137	1.852	2.0674	4	20.0477	0.216509	16Ca72.
16Ca72.	2	46.0192	32.3079	0.3704	0.0152	3.8188	0.8457	0.0026	0.0098	0.1865	0.6767	10.5186	4.403	99.1744	6.2676	1.7324	8	3.4535	0.038	0.0016	0.435	0.0003	0.1717	4.1	0.01	0.0014	0.1787	1.8276	2.0077	4	20.0138	0.283006	16Ca72.
16Ca72.	3	45.4844	32.4213	0.3287	0	3.6073	0.7479	0	0.0084	0.1987	0.612	10.6258	4.3665	98.401	6.2466	1.7534	8	3.4942	0.034	0	0.4143	0	0.1531	4.0956	0.0107	0.0012	0.163	1.8617	2.0258	4	20.0242	0.269827	16Ca72.
16Ca72.	4	45.8695	32.3438	0.3604	0	3.6537	0.8524	0.0168	0.0392	0.1932	0.647	10.9258	4.3919	99.2935	6.263	1.737	8	3.4679	0.037	0	0.4172	0.0019	0.1735	4.0975	0.0103	0.0057	0.1713	1.9031	2.0802	4	20.0533	0.293719	16Ca72.
16Ca72.	5	45.5015	33.0864	0.3654	0	3.1622	0.7081	0	0	0.1932	0.7535	10.5584	4.3903	98.7189	6.215	1.785	8	3.5413	0.0375	0	0.3612	0	0.1442	4.0843	0.0103	0	0.1996	1.8398	2.0394	4	20.03	0.285319	16Ca72.
16Ca72.	6	45.4801	32.9919	0.3504	0	3.2471	0.728	0.0413	0	0.1976	0.7805	10.4801	4.3875	98.6845	6.216	1.784	8	3.5304	0.036	0	0.3712	0.0048	0.1483	4.0907	0.0106	0	0.2068	1.8273	2.0341	4	20.0277	0.285467	16Ca72.
16Ca72.	7	44.8319	34.477	0.1752	0	2.8149	0.3648	0	0	0.1697	1.2091	9.9006	4.3912	98.3345	6.1224	1.8776	8	3.6714	0.018	0	0.3215	0	0.0743	4.0851	0.0091	0	0.3201	1.7249	2.045	4	20.0316	0.187721	16Ca72.
16Ca72.	8	44.1709	33.4662	0.2569	0	2.8329	0.5389	0.0271	0.014	0.2423	0.825	10.362	4.3144	97.0505	6.1394	1.8606	8	3.6216	0.0269	0	0.3293	0.0032	0.1117	4.0926	0.0132	0.0021	0.2223	1.8374	2.0618	4	20.0451	0.253288	16Ca72.
16Ca72.	14	45.7497	31.7997	0.4355	0	3.7411	0.8689	0.0478	0	0.1731	0.6322	10.7595	4.3643	98.5718	6.2861	1.7139	8	3.4357	0.045	0	0.4299	0.0056	0.178	4.0941	0.0093	0	0.1684	1.886	2.0544	4	20.0365	0.292811	16Ca72.
16Ca72.	15	45.6363	32.5706	0.3287	0.7499	3.2812	0.8573	0.0026	0	0.2121	0.6335	10.7535	4.4038	99.4296	6.2143	1.7857	8	3.4415	0.0337	0.0768	0.3737	0.0003	0.174	4.1	0.0113	0	0.1673	1.8681	2.0353	4	20.029	0.317692	16Ca72.
16Ca72.	16	46.0235	33.3623	0.292	0	3.1519	0.66	0.0194	0	0.1976	0.8789	10.5511	4.429	99.5657	6.2313	1.7687	8	3.555	0.0297	0	0.3569	0.0022	0.1332	4.0771	0.0105	0	0.2307	1.8225	2.0532	4	20.0371	0.271781	16Ca72.
16Ca72.	18	44.5324	33.0826	0.1885	0	3.0619	0.5074	0	0.0266	0.1574	0.8452	10.1572	4.3162	96.8755	6.1871	1.8129	8	3.6041	0.0197	0	0.3558	0	0.1051	4.0847	0.0086	0.004	0.2277	1.8003	2.0319	4	20.0265	0.228032	16Ca72.
16Ca72.	19	44.8661	33.128	0.2686	0	3.2227	0.587	0.0723	0	0.2155	0.8587	10.4198	4.35	97.9887	6.185	1.815	8	3.5674	0.0279	0	0.3715	0.0084	0.1206	4.0959	0.0116	0	0.2295	1.8325	2.062	4	20.0426	0.245072	16Ca72.
16Ca72.	20	44.7057	32.529	0.1635	0	2.6901	0.7462	0.0039	0.0154	0.1507	0.949	10.2572	4.2985	96.5091	6.2368	1.7632	8	3.5852	0.0172	0	0.3139	0.0005	0.1552	4.0719	0.0082	0.0023	0.2567	1.8255	2.0845	4	20.0516	0.330846	16Ca72.
16Ca72.	41	44.9432	33.5663	0.1935	1.491	2.6298	0.6733	0.0103	0.0378	0.1842	0.8101	10.1416	4.4099	99.091	6.1114	1.8886	8	3.4909	0.0198	0.1526	0.2991	0.0012	0.1365	4.1	0.0098	0.0055	0.2136	1.7593	1.9784	4	19.999	0.313361	16Ca72.
16Ca72.	42	44.4511	32.0075	0.3804	0	3.543	0.7048	0	0.014	0.201	0.6133	10.3801	4.2854	96.5806	6.2201	1.7799	8	3.4988	0.04	0	0.4146	0	0.147	4.1005	0.011	0.0021	0.1664	1.853	2.0215	4	20.0228	0.261752	16Ca72.
16Ca72.	44	44.9966	31.3424	0.3053	0	3.7437	0.8142	0	0.0196	0.211	0.5769	10.7138	4.2892	97.0128	6.2909	1.7091	8	3.4553	0.0321	0	0.4377	0	0.1697	4.0948	0.0116	0.0029	0.1564	1.9109	2.0702	4	20.0481	0.279388	16Ca72.
16Ca72.	48	44.3377	31.178	0.327	0.0109	3.5937	0.8673	0	0.0518	0.2032	0.6969	10.3488	4.244	95.8593	6.2647	1.7353	8	3.4567	0.0348	0.0012	0.4247	0	0.1827	4.1	0.0113	0.0078	0.1909	1.8654	2.0642	4	20.0433	0.30079	16Ca72.
16Ca74.	7	45.1678	32.58	0.332	0	3.1648	0.7495	0.0013	0.0028	0.1708	0.7993	10.3777	4.3461	97.6922	6.2322	1.7678	8	3.5303	0.0345	0	0.3652	0.0002	0.1542	4.0843	0.0092	0.0004	0.2138	1.8267	2.041	4	20.0299	0.296881	16Ca74.
16Ca74.	8	44.8105	34.3297	0.1702	0	2.7994	0.3267	0.0207	0.0322	0.2557	1.2765	9.7356	4.3808	98.1379	6.1339	1.8661	8	3.6723	0.0175	0	0.3205	0.0024	0.0667	4.0794	0.0137	0.0047	0.3388	1.7001	2.0436	4	20.0379	0.172262	16Ca74.
16Ca74.	9	45.155	33.3982	0.292	0	2.6193	0.456	0	0.0238	0.1652	0.9948	10.191	4.3594	97.6546	6.2114	1.7886	8	3.626	0.0302	0	0.3013	0	0.0935	4.0511	0.0089	0.0035	0.2653	1.7884	2.0572	4	20.0393	0.236829	16Ca74.
16Ca74.	10	45.3304	32.5687	0.297	0	3.444	0.7495	0	0.0126	0.2043	1.0325	10.3403	4.3599	98.3392	6.2348	1.7652	8	3.5142	0.0307	0	0.3961	0	0.1537	4.0948	0.011	0.0019	0.2754	1.8144	2.0916	4	20.0577	0.279556	16Ca74.
16Ca74.	12	45.2448	32.2154	0.3187	0	3.3835	0.8325	0	0.0308	0.249	1.0393	10.2994	4.3402	97.9534	6.2513	1.7487	8	3.4971	0.0331	0	0.391	0	0.1715	4.0927	0.0135	0.0046	0.2784	1.8154	2.0983	4	20.0649	0.304889	16Ca74.
16Ca74.	13	45.5465	31.9867	0.3287	0	3.2999	0.8474	0	0	0.1943	0.643	10.7246	4.345	97.9159	6.2861	1.7139	8	3.489	0.0341	0	0.3809	0	0.1743	4.0783	0.0105	0	0.1721	1.8883	2.0603	4	20.0407	0.313941	16Ca74.
16Ca74.	14	44.3313	32.3571	0.3554	0.1134	3.3947	0.6252	0.0336	0.0042	0.1976	0.7549	10.5415	4.2927	97.0015	6.1928	1.8072	8	3.52	0.0373	0.0119	0.3966	0.004	0.1302	4.1	0.0108	0.0006	0.2045	1.8786	2.0837	4	20.0527	0.247153	16Ca74.
16Ca74.	15	45.2277	32.8993	0.3037	0	3.2767	0.728	0.0065	0	0.2333	0.7832	10.7415	4.3663	98.5661	6.2116	1.7884	8	3.5369	0.0314	0	0.3764	0.0008	0.149	4.0944	0.0126	0	0.2085	1.882	2.0905	4	20.0578	0.283593	16Ca74.
16Ca74.	16	44.8276	33.179	0.1785	0.4626	3.1834	0.5688	0.0349	0.0098	0.1775	0.9894	10.303	4.3589	98.2734	6.1671	1.8329	8	3.5467	0.0185	0.0479	0.3663	0.0041	0.1167	4.1	0.0096	0.0014	0.2639	1.8082	2.0736	4	20.0464	0.241615	16Ca74.
16Ca74.	4	45.6919	31.8205	0.2486	0	3.5482	0.9485	0.0065	0.028	0.2133	1.1094	9.9669	4.3518	97.9335	6.2962	1.7038	8	3.4639	0.0258	0	0.4089	0.0008	0.1948	4.0942	0.0115	0.0041	0.2964	1.7521	2.0526	4	20.0399	0.322677	16Ca74.
16Ca74.	5	45.1678	31.7732	0.2269	0.0381	3.5152	0.9253	0	0.0252	0.2322	0.9422	9.9898	4.3183	97.1542	6.2723	1.7277	8	3.4725	0.0237	0.004	0.4082	0	0.1916	4.1	0.0126	0.0037	0.2537	1.7698	2.0272	4	20.0262	0.31944	16Ca74.
16Ca74.	6	45.7262	31.7109	0.2736	0	3.5958	1.0016	0	0.0616	0.2077	1.0433	10.0175	4.3526	97.9906	6.2998	1.7002	8	3.4489	0.0284	0	0.4143	0	0.2057	4.0973	0.0112	0.0091	0.2787	1.7607	2.0485	4	20.04	0.331774	16Ca74.
16Ca74.	7	45.7732	31.5994	0.2269	0	3.7874	0.9502	0	0	0.2021	1.1363	9.9175	4.35	97.9431	6.31	1.69	8	3.444	0.0235	0	0.4367	0	0.1953	4.0995	0.0109	0	0.3037	1.7441	2.0479	4	20.0348	0.309019	16Ca74.
16Ca74.	8	45.7668	31.6882	0.2002	0.0927	3.6834	0.9867	0	0.0322	0.211	1.0649	9.9524	4.3555	98.0341	6.3011	1.6989	8	3.443	0.0207	0.0096	0.4241	0	0.2025	4.1	0.0114	0.0047	0.2843	1.7481	2.0371	4	20.0299	0.323173	16Ca74.
16Ca74.	9	46.0578	31.2574	0.1902	0.1739	3.7236	1.1127	0	0	0.2345	1.0042	9.8549	4.3584	97.9676	6.337	1.663	8	3.4056	0.0197	0.018	0.4285	0	0.2282	4.1	0.0126	0	0.2679	1.7298	1.9977	4	20.0115	0.347495	16Ca74.
16Ca74.	10	45.4181	31.4501	0.1952	0.2175	3.5428	1.0049	0	0	0.2423	0.9948	10.1018	4.3243	97.4919	6.2982	1.7018	8	3.4383	0.0204	0.0227	0.4109	0	0.2077	4.1	0.0132	0	0.2675	1.7871	2.0546	4	20.0404	0.335758	16Ca74.
16Ca74.	11	45.463	30.7661	0.2803	0.0685	3.7271	1.1558	0	0.063	0.2345	0.8492	10.0067	4.303	96.9172	6.3357	1.6643	8	3.3889	0.0294	0.0072	0.4344	0	0.2401	4.1	0.0128	0.0094	0.2295	1.779	2.0179	4	20.0218	0.355967	16Ca74.
16Ca74.	12	44.9089	32.6499	0.2436	0	3.1069	0.6169	0	0	0.2021	0.8735	10.0741	4.324	96.9999	6.2282	1.7718	8	3.5648	0.0254	0	0.3603	0	0.1275	4.0781	0.011	0	0.2349	1.7824	2.0172	4	20.0196	0.261378	16Ca74.
16Ca74.	13	45.7026	32.0472	0.2953	0.1911	3.0957	1.1989	0.0026	0.0098	0.2467	0.5486	10.6764	4.372	98.3871	6.2687	1.7313	8	3.4492	0.0305	0.0197	0.3551	0.0003	0.2452	4.1	0.0133	0.0014	0.1459	1.8682	2.0155	4	20.021	0.408462	16Ca74.
16Ca74.	29	45.0672	34.0576	0.1835	0	2.739	0.5058	0	0	0.1183	0.9112	10.3186	4.388	98.2893	6.159	1.841	8	3.6445	0.0189	0	0.313	0	0.103	4.0794	0.0063	0	0.2414	1.799	2.0404	4	20.0266	0.247596	16Ca74.
16Ca74.	30	45.7689	31.2139	0.292	0.1531	3.7012	1.0679	0.0362	0	0.2278	0.9503	10.2102	4.3419	97.9634	6.3213	1.6787	8	3.4021	0.0303	0.0159	0.4275	0.0042	0.2199	4.1	0.0123	0	0.2545	1.799	2.0535	4	20.0391	0.339666	16Ca74.
16Ca74.	31	44.4661	31.5711	0.3337	0	3.4362	0.8009	0	0	0.259	0.7913	10.1319	4.2638	96.054	6.2538	1.7462	8	3.4869	0.0353	0	0.4042	0	0.1679	4.0943	0.0143	0	0.2158	1.8179	2.0336	4	20.0311	0.29348	16Ca74.
16Ca74.	32	44.5239	31.4898	0.287	0	3.3526	0.7711	0	0.0014	0.1999	0.829	10.1115	4.2577	95.8237	6.2709	1.7291	8	3.498	0.0304	0	0.3949	0	0.1619	4.0852	0.011	0.0002	0.2264	1.8168	2.0434	4	20.0328	0.290769	16Ca74.
16Ca74.	33	44.3377	31.811	0.3737	0	3.2304	0.7197	0.022	0	0.2043	0.8479	10.5668	4.2624	96.3759	6.2377	1.7623	8	3.5123	0.0396	0	0.3801	0.0026	0.1509	4.0855	0.0113	0	0.2313	1.8965	2.1278	4	20.0752	0.284181	16Ca74.
16Ca74.	34	44.5303	31.5937	0.2937	0	3.471	0.781	0	0	0.2099	0.7899	10.5692	4.2669	96.5055	6.2583	1.7417	8	3.4914	0.031	0	0.408	0	0.1636	4.0941	0.0116	0	0.2152	1.895	2.1102	4	20.0667	0.286214	16Ca74.
16Ca74.	36	43.8927	32.0321	0.3304	0	3.0889	0.6318	0	0.0126	0.2121	0.9004	10.2404	4.2387	95.58	6.2097	1.7903	8	3.5507	0.0352	0	0.3655	0	0.1333	4.0846	0.0118	0.0019	0.247	1.8482	2.0971	4	20.0613	0.267241	16Ca74.
16Ca74.	53	44.9367	34.3429	0.3187	0	2.7338	0.4411	0.0026	0.0028	0.2133	0.9867	10.5969	4.3979	98.9734	6.1272	1.8728	8	3.6462	0.0327	0	0.3117	0.0003	0.0897	4.0806	0.0114	0.0004	0.2609	1.8433	2.1046	4	20.0639	0.223468	16Ca74.
16Ca74.	54	45.709	32.0812	0.282	0	3.5301	0.8424	0	0.0266	0.2501	1.0325	10.3379	4.3623	98.4542	6.2834	1.7166	8	3.481	0.0292	0	0.4058	0	0.1726	4.0886	0.0135	0.0039	0.2752	1.813	2.0921	4	20.0615	0.298409	16Ca74.
16Ca74.	55	45.0822	34.1445	0.2836	0.4267	2.9249	0.5638	0.0181	0.007	0.1686	0.8196	10.6294	4.4187	99.4872	6.1181	1.8819	8	3.5794	0.029	0.0436	0.332	0.0021	0.1141	4.1	0.009	0.001	0.2156	1.8403	2.0569	4	20.0374	0.255772	16Ca74.
16Ca74.	56	44.6736	30.6528	0.2536	0	4.0679	0.8822	0	0.4519	0.2255	0.4516	10.4271	4.2444	96.3306	6.3117	1.6883	8	3.4158	0.027	0	0.4807	0	0.1858	4.1093	0.0125	0.0684	0.1237	1.8794	2.0715	4	20.0825	0.27877	16Ca74.
11Ca105.	71	49.3416	28.7161	0.2686	0	4.5272	2.0297	0.0336	0		0.4785	10.615	4.4745	100.545	6.6127	1.3873	8	3.1485	0.0271	0	0.5074	0.0038	0.4055	4.0923		0	0.1243	1.8149	1.9392	4	19.9791	0.444189	11Ca105.
11Ca105.	72	48.2249	28.4364	0.2136	0.8259	3.9641	2.0944	0.0336	0		0.5109	10.6258	4.4101	99.4084	6.5574	1.4427	8	3.1144	0.0218	0.0845	0.4508	0.0039	0.4245	4.1		0	0.1347	1.8432	1.9779	4	20	0.484977	11Ca105.
11Ca105.	73	49.1256	27.5503	0.2102	0.126	4.8962	2.1359	0.0155	0		0	11.1486	4.4177	99.6757	6.6683	1.3317	8	3.0758	0.0215	0.0129	0.5558	0.0018	0.4322	4.1		0	0	1.9306	1.9306	4	19.9733	0.437449	11Ca105.
11Ca105.	75	48.6784	29.2716	0.2336	0.2435	4.0585	2.0563	0	0		0.8007	10.3464	4.4601	100.164	6.5449	1.4551	8	3.1832	0.0236	0.0246	0.4563	0	0.4121	4.1		0	0.2087	1.7746	1.9834	4	19.994	0.474551	11Ca105.
11Ca105.	76	48.5907	28.8105	0.2286	1.331	3.7605	2.1126	0.0594	0.0084		0.5783	10.3476	4.4635	100.3	6.5281	1.4719	8	3.0899	0.0231	0.1346	0.4225	0.0068	0.4231	4.1		0.0012	0.1506	1.7735	1.9253	4	19.9641	0.500355	11Ca105.
11Ca105.	77	47.2237	28.7236	0.2953	1.6021	3.1847	2.1259	0	0		0.7063	10.509	4.3779	98.7734	6.4685	1.5315	8	3.1055	0.0304	0.1651	0.3648	0	0.4341	4.1		0	0.1876	1.8364	2.024	4	20.016	0.543372	11Ca105.
11Ca105.	78	48.6977	28.8068	0.2353	0	4.5336	1.9534	0	0.0042		0.4893	10.456	4.4369	99.6322	6.5816	1.4184	8	3.1702	0.0239	0	0.5124	0	0.3936	4.1001		0.0006	0.1282	1.8028	1.9316	4	19.9692	0.434437	11Ca105.
11Ca105.	79	47.827	26.7756	0.2286	2.0214	4.2945	2.043	0.0336	0		0.3532	10.4596	4.3485	98.4171	6.5955	1.4045	8	2.9473	0.0237	0.2098	0.4953	0.0039	0.42	4.1		0	0.0944	1.8401	1.9346	4	19.9725	0.458866	11Ca105.
11Ca105.	80	46.6311	28.41	0.2269	3.5744	3.2574	1.6566	0.0594	0		0.4758	10.4945	4.3721	99.1582	6.3959	1.6041	8	2.9884	0.0234	0.3689	0.3736	0.0069	0.3387	4.1		0	0.1265	1.8363	1.9628	4	19.9814	0.475502	11Ca105.
11Ca105.	81	48.7961	28.1606	0.2486	0.2868	4.493	2.0944	0.0413	0		0.4691	10.5295	4.4258	99.5933	6.6116	1.3884	8	3.1085	0.0253	0.0292	0.5091	0.0047	0.423	4.1		0	0.1232	1.8201	1.9433	4	19.9794	0.453814	11Ca105.
11Ca105.	82	49.0806	27.8866	0.2052	0.4016	4.6573	2.1226	0.0258	0		0.3828	10.8872	4.4348	100.156	6.6366	1.3634	8	3.0808	0.0209	0.0409	0.5267	0.003	0.4279	4.1		0	0.1004	1.8781	1.9784	4	20.0007	0.448251	11Ca105.
11Ca105.	83	47.6623	27.8923	0.262	0.2593	4.3234	1.9783	0.0646	0.0014		0.4354	10.2946	4.3388	97.5985	6.5875	1.4125	8	3.1309	0.0272	0.027	0.4997	0.0076	0.4076	4.1		0.0002	0.1167	1.8151	1.932	4	19.9802	0.449245	11Ca105.
11Ca105.	84	48.8175	28.4874	0.2202	0.577	4.1842	2.116	0.0801	0		0.5985	10.5319	4.4461	100.059	6.5842	1.4158	8	3.1125	0.0223	0.0586	0.472	0.0091	0.4254	4.1		0	0.1565	1.8121	1.9686	4	19.9843	0.474036	11Ca105.
11Ca105.	85	48.5757	28.1511	0.2169	0.2769	4.5392	2.0297	0.0129	0		0.6645	10.5752	4.4087	99.5343	6.6072	1.3928	8	3.1201	0.0222	0.0283	0.5163	0.0015	0.4116	4.1		0	0.1753	1.835	2.0103	4	20.0186	0.443582	11Ca105.
11Ca105.	86	49.0785	28.3968	0.2152	0	4.6352	2.0248	0.0258	0		0.3262	10.8174	4.4432	100.005	6.6237	1.3763	8	3.1406	0.0219	0	0.5232	0.003	0.4074	4.096		0	0.0854	1.8625	1.9478	4	19.9807	0.437782	11Ca105.
11Ca105.	87	49.5363	28.5366	0.0918	0.3591	4.7714	1.9667	0.0671	0		0.1308	11.0221	4.4845	100.966	6.624	1.376	8	3.1214	0.0092	0.0361	0.5336	0.0076	0.3921	4.1		0	0.0339	1.8803	1.9142	4	19.9571	0.423571	11Ca105.
11Ca105.	88	49.5384	26.889	0.1268	0.9016	4.9342	2.2337	0.0284	0		0.2089	10.6897	4.4347	99.9855	6.6986	1.3014	8	2.9838	0.0129	0.0917	0.558	0.0033	0.4503	4.1		0	0.0548	1.844	1.8988	4	19.9494	0.446593	11Ca105.
11Ca105.	89	48.3597	27.9943	0.2069	0.491	4.4829	2.0198	0	0		0.4475	10.621	4.3928	99.0656	6.6016	1.3984	8	3.1055	0.0212	0.0504	0.5118	0	0.411	4.1		0	0.1184	1.8496	1.9681	4	19.9921	0.445384	11Ca105.
11Ca105.	90	49.0421	28.0245	0.2086	0.3251	4.5601	2.1591	0.0026	0		0.3923	11.0245	4.4359	100.203	6.6297	1.3703	8	3.0948	0.0212	0.0331	0.5156	0.0003	0.4351	4.1		0	0.1028	1.9013	2.0041	4	20.0065	0.457663	11Ca105.
11Ca105.	106	47.3884	28.1587	0.2886	1.9398	3.6437	1.9733	0.0387	0		0.5486	10.9511	4.3748	99.3453	6.4957	1.5043	8	3.0447	0.0298	0.2001	0.4177	0.0045	0.4032	4.1		0	0.1458	1.915	2.0608	4	20.0368	0.491168	11Ca105.
11Ca105.	107	47.4932	28.7369	0.347	0.9529	3.3713	2.1972	0	0		0.3909	10.368	4.3828	98.2826	6.4982	1.5018	8	3.1322	0.0357	0.0981	0.3858	0	0.4482	4.1		0	0.1037	1.8097	1.9134	4	19.9636	0.53741	11Ca105.
11Ca105.	108	48.3875	28.3703	0.3637	0	3.983	2.2287	0	0		0.6915	10.2608	4.4013	98.7132	6.5927	1.4073	8	3.1484	0.0373	0	0.4538	0	0.4527	4.0922		0	0.1827	1.7835	1.9662	4	19.9873	0.499393	11Ca105.
11Ca105.	109	48.5971	28.7803	0.2186	0.1121	4.0726	2.1757	0.0026	0.0112		0.6282	10.4367	4.4314	99.5117	6.5762	1.4238	8	3.1662	0.0223	0.0114	0.4609	0.0003	0.4389	4.1		0.0016	0.1648	1.8017	1.9681	4	19.9913	0.487775	11Ca105.
11Ca105.	110	48.3554	28.7784	0.272	0.1727	4.2483	2.0049	0.0181	0		0.5864	10.5584	4.4189	99.4762	6.562	1.438	8	3.1648	0.0278	0.0176	0.4821	0.0021	0.4056	4.1		0	0.1543	1.8279	1.9822	4	20.0012	0.456911	11Ca105.
11Ca105.	111	45.985	28.6367	0.332	3.2666	2.6428	1.8805	0.0181	0		0.2089	10.9041	4.3351	98.2478	6.3611	1.6389	8	3.0298	0.0346	0.34	0.3057	0.0021	0.3878	4.1		0	0.056	1.9243	1.9803	4	19.9964	0.559193	11Ca105.
11Ca105.	112	48.3447	28.7387	0.3003	0.1412	4.1918	2.0646	0	0		0.8775	10.4789	4.4173	99.5841	6.5631	1.4369	8	3.1612	0.0307	0.0144	0.4759	0	0.4178	4.1		0	0.231	1.8148	2.0458	4	20.0276	0.467495	11Ca105.
11Ca105.	113	47.6302	28.0019	0.2603	0.0178	3.9271	2.242	0	0.0042		0.6497	10.5668	4.3349	97.7473	6.589	1.411	8	3.1544	0.0271	0.0019	0.4543	0	0.4624	4.1		0.0006	0.1743	1.8648	2.0397	4	20.0383	0.504418	11Ca105.
11Ca105.	114	48.5223	27.8072	0.2469	0	3.8621	2.2586	0.0129	0		0.465	10.5921	4.3742	98.1413	6.652	1.348	8	3.1448	0.0255	0	0.4428	0.0015	0.4616	4.0761		0	0.1236	1.8525	1.9761	4	19.988	0.510394	11Ca105.
11Ca105.	119	48.7105	28.5441	0.3053	0	4.3754	2.0927	0	0		0.705	10.415	4.4296	99.5792	6.5943	1.4057	8	3.1486	0.0311	0	0.4954	0	0.4224	4.0974		0	0.185	1.7987	1.9838	4	19.9921	0.460231	11Ca105.
11Ca105.	120	48.9865	28.2456	0.2219	0.3415	4.1672	2.2967	0.0258	0		0.1955	10.4379	4.442	99.3606	6.6131	1.3869	8	3.1071	0.0225	0.0347	0.4705	0.003	0.4622	4.1		0	0.0512	1.7976	1.8488	4	19.9244	0.495551	11Ca105.
11Ca105.	1	48.5415	28.0264	0.2836	0	3.965	2.111	0	0	0.3104	0.6241	10.2271	4.3838	98.473	6.64	1.36	8	3.1584	0.0292	0	0.4536	0	0.4305	4.0716	0.0166	0	0.1655	1.7847	1.9502	4	19.9918	0.486936	11Ca105.
11Ca105.	2	48.3083	27.2102	0.3187	0	4.6648	2.1873	0	0.0112	0.2735	0.2049	10.9414	4.3508	98.4711	6.6583	1.3417	8	3.0784	0.033	0	0.5377	0	0.4494	4.0986	0.0148	0.0017	0.0548	1.9239	1.9803	4	20.0057	0.455273	11Ca105.
11Ca105.	3	48.6143	26.8644	0.1719	0	4.4693	2.2022	0	0	0.2613	0.2049	10.2078	4.3404	97.3364	6.7164	1.2836	8	3.0907	0.0179	0	0.5164	0	0.4536	4.0786	0.0141	0	0.0549	1.7991	1.854	4	19.9412	0.467629	11Ca105.
11Ca105.	4	48.4025	28.5158	0.2886	0	4.1155	1.9833	0.0026	0	0.2456	0.4165	10.668	4.399	99.0374	6.5981	1.4019	8	3.1795	0.0296	0	0.4692	0.0003	0.403	4.0816	0.0131	0	0.1101	1.8552	1.9653	4	19.9958	0.46205	11Ca105.
11Ca105.	5	48.2206	28.5328	0.262	0	4.1181	2.0695	0	0.0224	0.2858	0.6457	10.2355	4.392	98.7844	6.5838	1.4162	8	3.1752	0.0269	0	0.4702	0	0.4212	4.0936	0.0153	0.0033	0.1709	1.7828	1.957	4	19.9955	0.472515	11Ca105.
11Ca105.	6	48.411	28.4062	0.2336	0	4.3188	2.038	0	0	0.2668	0.5055	10.3295	4.3987	98.9082	6.5997	1.4003	8	3.1638	0.024	0	0.4924	0	0.4142	4.0943	0.0143	0	0.1336	1.7965	1.9301	4	19.9793	0.456872	11Ca105.
11Ca105.	7	47.9126	27.9225	0.2336	0.1877	4.3532	2.0463	0.0232	0.0056	0.3115	0.4206	10.509	4.3537	98.2794	6.5993	1.4007	8	3.132	0.0242	0.0195	0.5014	0.0027	0.4202	4.1	0.0168	0.0008	0.1123	1.8466	1.9597	4	19.9967	0.455946	11Ca105.
11Ca105.	17	48.3019	26.9834	0.2036	0.8344	4.4428	2.2188	0.031	0.0168	0.268	0.1213	11.0113	4.358	98.7912	6.6465	1.3535	8	3.0225	0.0211	0.0864	0.5113	0.0036	0.4551	4.1	0.0144	0.0025	0.0324	1.933	1.9678	4	19.9984	0.470923	11Ca105.
11Ca105.	18	48.3533	27.1251	0.1518	0	4.4937	2.1392	0.0336	0.042	0.1786	0.248	10.6993	4.3366	97.8012	6.6864	1.3136	8	3.1071	0.0158	0	0.5197	0.0039	0.441	4.0875	0.0097	0.0062	0.0665	1.8875	1.9602	4	19.9929	0.45904	11Ca105.
11Ca105.	19	48.533	27.4558	0.1852	0	4.8076	2.0861	0	0.007	0.2702	0.1928	10.6608	4.3694	98.5678	6.6608	1.3392	8	3.1018	0.0191	0	0.5518	0	0.4268	4.0996	0.0145	0.001	0.0513	1.8665	1.9189	4	19.9745	0.436133	11Ca105.
11Ca105.	20	48.411	27.7562	0.2286	0	4.3394	2.101	0	0	0.2814	0.3707	10.4222	4.3689	98.2794	6.6448	1.3552	8	3.1349	0.0236	0	0.4981	0	0.4299	4.0865	0.0151	0	0.0987	1.825	1.9236	4	19.977	0.463254	11Ca105.
11Ca105.	21	46.2375	27.7619	0.1935	0.4447	3.6896	2.0181	0.0207	0.0266	0.2088	0.3383	9.8657	4.2397	95.0452	6.5398	1.4602	8	3.1676	0.0206	0.0473	0.4364	0.0025	0.4255	4.1	0.0116	0.004	0.0928	1.7802	1.877	4	19.9501	0.493677	11Ca105.
11Ca105.	22	48.4666	27.4105	0.1935	0	4.3252	2.043	0	0.0266	0.2568	0.3127	10.4222	4.3503	97.8075	6.6809	1.3191	8	3.134	0.0201	0	0.4986	0	0.4198	4.0725	0.0139	0.0039	0.0836	1.8328	1.9203	4	19.976	0.457099	11Ca105.
11Ca105.	23	48.6356	27.5352	0.1969	0	4.3484	2.1674	0.031	0	0.278	0.3842	10.7391	4.373	98.6886	6.6694	1.3306	8	3.1196	0.0203	0	0.4987	0.0036	0.4431	4.0852	0.0149	0	0.1021	1.8787	1.9808	4	20.0054	0.470482	11Ca105.
11Ca105.	24	48.7169	27.7392	0.2019	0	4.2223	2.0728	0	0.0112	0.2523	0.4165	10.6029	4.3804	98.6165	6.6693	1.3307	8	3.1449	0.0208	0	0.4834	0	0.423	4.0721	0.0135	0.0016	0.1106	1.8518	1.964	4	19.9963	0.466681	11Ca105.
11Ca105.	25	48.1992	27.7543	0.1835	0	4.239	2.1193	0	0.0406	0.2222	0.3451	10.4837	4.3531	97.94	6.6397	1.3603	8	3.1457	0.019	0	0.4884	0	0.4352	4.0883	0.012	0.006	0.0922	1.8424	1.9405	4	19.9853	0.4712	11Ca105.
11Ca105.	26	48.4388	27.9036	0.1852	0.0331	4.4266	2.1558	0.0232	0.0112	0.2289	0.3801	10.4608	4.3823	98.6296	6.6283	1.3717	8	3.1285	0.0191	0.0034	0.5066	0.0027	0.4398	4.1	0.0123	0.0016	0.1009	1.8261	1.9286	4	19.9766	0.464708	11Ca105.
11Ca105.	27	48.4731	27.983	0.1969	0	4.2133	2.0612	0	0.0014	0.2747	0.3801	10.5523	4.3778	98.5138	6.6398	1.3602	8	3.1573	0.0203	0	0.4827	0	0.4209	4.0812	0.0147	0.0002	0.101	1.844	1.9452	4	19.9874	0.465803	11Ca105.
11Ca105.	28	48.5308	27.4048	0.1819	0	4.1875	2.0413	0.0478	0.0616	0.2635	0.3181	10.4572	4.351	97.8455	6.6887	1.3113	8	3.1402	0.0189	0	0.4827	0.0056	0.4194	4.0667	0.0142	0.0091	0.085	1.8386	1.9327	4	19.9852	0.464915	11Ca105.
11Ca105.	29	48.4196	27.6863	0.2202	0	4.3844	2.1093	0	0.007	0.2479	0.372	10.7318	4.3669	98.5455	6.649	1.351	8	3.1298	0.0228	0	0.5035	0	0.4318	4.0879	0.0133	0.001	0.0991	1.88	1.9801	4	20.0039	0.46167	11Ca105.
11Ca105.	31	48.8367	27.127	0.2069	0	4.495	2.1624	0.0065	0.0112	0.2345	0.3222	10.45	4.367	98.2193	6.7062	1.2938	8	3.0964	0.0214	0	0.5162	0.0008	0.4427	4.0774	0.0126	0.0016	0.0858	1.8306	1.918	4	19.9725	0.461675	11Ca105.
11Ca105.	32	48.4688	27.1913	0.1502	0	4.5491	2.1408	0	0.0434	0.2233	0.3437	10.4379	4.347	97.8954	6.6862	1.3138	8	3.1071	0.0156	0	0.5248	0	0.4403	4.0878	0.0121	0.0064	0.0919	1.8369	1.9353	4	19.9829	0.456222	11Ca105.
11Ca105.	33	49.363	27.4388	0.1719	0	4.7845	2.1591	0	0	0.2579	0.3127	10.6945	4.4179	99.6002	6.7003	1.2997	8	3.0898	0.0175	0	0.5431	0	0.4369	4.0874	0.0137	0	0.0823	1.8519	1.9342	4	19.9808	0.445816	11Ca105.
11Ca105.	34	48.61	26.8266	0.1502	0	4.7922	2.1259	0.0478	0	0.2847	0.2723	10.6547	4.343	98.1073	6.7119	1.2881	8	3.0775	0.0156	0	0.5534	0.0056	0.4376	4.0897	0.0154	0	0.0729	1.8768	1.9497	4	19.9903	0.441574	11Ca105.
11Ca105.	35	47.6494	26.3712	0.1618	0	4.8527	1.9949	0.0155	0.0308	0.3171	0.2265	10.6355	4.2607	96.5161	6.7063	1.2937	8	3.0807	0.0171	0	0.5712	0.0018	0.4186	4.0894	0.0175	0.0046	0.0618	1.9096	1.976	4	20.0078	0.422914	11Ca105.
11Ca105.	36	46.676	27.4728	0.1802	1.8109	3.4753	2.0828	0.0284	0.0126	0.259	0.1928	10.2958	4.2913	96.7779	6.5226	1.4774	8	3.0472	0.0189	0.1904	0.4062	0.0034	0.4339	4.1	0.0142	0.0019	0.0522	1.8354	1.8896	4	19.959	0.516486	11Ca105.
11Ca105.	42	48.4624	28.0472	0.2836	0	4.2171	2.101	0	0.0182	0.2479	0.5621	10.3186	4.386	98.6441	6.626	1.374	8	3.1455	0.0292	0	0.4822	0	0.4282	4.0851	0.0133	0.0027	0.149	1.7998	1.9515	4	19.9904	0.470343	11Ca105.
11Ca105.	46	48.4773	28.5026	0.3921	0	3.8106	2.0314	0.0284	0.0238	0.3059	0.6214	10.0886	4.4025	98.6845	6.6032	1.3968	8	3.1788	0.0402	0	0.4341	0.0033	0.4125	4.0688	0.0163	0.0035	0.1641	1.7531	1.9207	4	19.9784	0.487243	11Ca105.
11Ca105.	47	49.5363	27.5692	0.2836	0	3.4568	2.3763	0.0736	0.007	0.2869	0.5217	10.4861	4.4185	99.016	6.7229	1.2771	8	3.1327	0.029	0	0.3924	0.0085	0.4808	4.0432	0.0153	0.001	0.1373	1.8155	1.9538	4	19.9927	0.550618	11Ca105.
11Ca105.	48	48.9587	27.3424	0.297	0	3.9032	2.3382	0	0	0.2992	0.4516	10.6029	4.3819	98.5751	6.7	1.3	8	3.1101	0.0306	0	0.4467	0	0.477	4.0644	0.016	0	0.1198	1.8511	1.9709	4	20.0015	0.516401	11Ca105.
11Ca105.	49	48.15	27.5597	0.2636	0.0637	4.4814	2.1541	0.0142	0.0056	0.3729	0.399	10.3825	4.3537	98.2005	6.632	1.368	8	3.1059	0.0273	0.0066	0.5162	0.0017	0.4423	4.1	0.0201	0.0008	0.1066	1.8244	1.9317	4	19.986	0.46145	11Ca105.
11Ca105.	50	48.9287	28.153	0.2736	0	4.1104	2.1591	0.0736	0	0.2992	0.5729	10.3729	4.4192	99.3626	6.6394	1.3606	8	3.1418	0.0279	0	0.4665	0.0085	0.4368	4.0814	0.0159	0	0.1507	1.7957	1.9464	4	19.9891	0.48356	11Ca105.
11Ca105.	51	48.8303	28.0075	0.3103	0	3.9302	2.1475	0	0.0168	0.297	0.6012	10.2596	4.4012	98.8017	6.6531	1.3469	8	3.1505	0.0318	0	0.4478	0	0.4362	4.0664	0.0159	0.0025	0.1588	1.7833	1.9446	4	19.9894	0.493439	11Ca105.
11Ca105.	52	49.3138	27.7373	0.3771	0	3.7411	2.2868	0	0	0.2702	0.6416	10.4343	4.4195	99.2217	6.6912	1.3088	8	3.1269	0.0385	0	0.4245	0	0.4626	4.0525	0.0144	0	0.1688	1.8062	1.975	4	20.0019	0.521474	11Ca105.
11Ca105.	53	49.3737	27.9263	0.3537	0	3.9663	2.3033	0.0013	0	0.3539	0.5931	10.2958	4.4376	99.605	6.6721	1.3279	8	3.1198	0.036	0	0.4482	0.0001	0.464	4.0681	0.0187	0	0.1554	1.7749	1.9303	4	19.9839	0.50866	11Ca105.
11Ca105.	55	48.242	28.1039	0.2903	0	4.2416	2.0845	0.0232	0	0.2892	0.4664	10.3897	4.377	98.5077	6.6094	1.3906	8	3.1473	0.0299	0	0.486	0.0027	0.4257	4.0917	0.0155	0	0.1239	1.8159	1.9398	4	19.9854	0.46693	11Ca105.
11Ca105.	56	48.6314	27.7033	0.2736	0	4.3818	2.1209	0	0.0378	0.3059	0.4448	10.4054	4.3826	98.6876	6.6542	1.3458	8	3.1217	0.0282	0	0.5014	0	0.4326	4.0839	0.0164	0.0055	0.118	1.8163	1.9399	4	19.9891	0.463169	11Ca105.
11Ca105.	57	48.9159	27.2215	0.2453	0	4.7227	2.2752	0.0452	0.0252	0.2601	0.4044	10.4813	4.3891	98.9858	6.6832	1.3168	8	3.0665	0.0252	0	0.5396	0.0052	0.4634	4.1	0.0139	0.0037	0.1071	1.8269	1.9377	4	19.9846	0.462014	11Ca105.
11Ca105.	58	48.4452	27.3953	0.2369	0.5384	4.5907	2.1176	0.0207	0	0.3093	0.1631	11.0318	4.3776	99.2267	6.6364	1.3636	8	3.0593	0.0244	0.0555	0.5259	0.0024	0.4324	4.1	0.0166	0	0.0433	1.9279	1.9712	4	20.0022	0.451216	11Ca105.
11Ca105.	59	47.8676	26.7869	0.2152	2.4761	3.5265	2.4078	0.0284	0	0.3026	0.155	10.6993	4.3625	98.828	6.5799	1.4201	8	2.9195	0.0223	0.2561	0.4054	0.0033	0.4934	4.1	0.0163	0	0.0413	1.8762	1.9176	4	19.9751	0.548954	11Ca105.
11Ca105.	60	48.0773	28.563	0.287	0	4.1721	1.9634	0	0	0.2646	0.5149	10.7053	4.3832	98.9309	6.5774	1.4226	8	3.1829	0.0295	0	0.4774	0	0.4004	4.0903	0.0142	0	0.1366	1.8684	2.005	4	20.0167	0.45614	11Ca105.
11Ca105.	61	48.595	28.4402	0.267	0	4.0653	1.9883	0	0.0056	0.2959	0.6228	10.5535	4.4042	99.2378	6.6165	1.3835	8	3.1804	0.0273	0	0.4629	0	0.4036	4.0742	0.0158	0.0008	0.1644	1.8331	1.9984	4	20.0154	0.465782	11Ca105.
16Ca106.	1	47.5531	31.8318	0.2703	0	2.784	1.2537	0	0	0.2568	0.9153	9.5814	4.4542	98.9006	6.402	1.598	8	3.4528	0.0274	0	0.3135	0	0.2516	4.0452	0.0135	0	0.2389	1.6456	1.8845	4	19.9558	0.445231	16Ca106.
16Ca106.	2	46.6204	32.2494	0.2236	0	2.4302	0.9883	0.0129	0	0.249	0.9058	10.4487	4.4006	98.5289	6.3529	1.6471	8	3.5323	0.0229	0	0.277	0.0015	0.2008	4.0345	0.0133	0	0.2393	1.8164	2.0558	4	20.0412	0.42026	16Ca106.
16Ca106.	3	46.3145	33.4794	0.1385	0	1.8731	0.7728	0.031	0.0392	0.1731	0.7454	10.6005	4.4195	98.5869	6.2842	1.7158	8	3.6381	0.0141	0	0.2126	0.0036	0.1563	4.0247	0.0092	0.0057	0.1961	1.8349	2.0367	4	20.0304	0.423692	16Ca106.
16Ca106.	4	46.2952	32.393	0.2753	0	2.2128	0.9817	0.0194	0.0098	0.307	0.8128	10.409	4.3862	98.1021	6.3294	1.6706	8	3.5489	0.0283	0	0.253	0.0022	0.2001	4.0325	0.0164	0.0014	0.2155	1.8155	2.0324	4	20.0334	0.441624	16Ca106.
16Ca106.	5	46.3872	31.9282	0.2753	0	2.1626	1.0729	0	0.0056	0.2267	0.6201	10.4728	4.3702	97.5215	6.3652	1.6348	8	3.5286	0.0284	0	0.2482	0	0.2195	4.0247	0.0122	0.0008	0.165	1.8333	1.9991	4	20.0121	0.469318	16Ca106.
16Ca106.	8	46.3851	32.6499	0.277	0	2.2179	0.9999	0.071	0	0.2043	0.7306	10.6415	4.4065	98.5837	6.3124	1.6876	8	3.5491	0.0284	0	0.2524	0.0082	0.2029	4.0409	0.0109	0	0.1928	1.8475	2.0402	4	20.031	0.44564	16Ca106.
16Ca106.	9	46.5327	32.7293	0.2569	0	2.0893	0.9286	0.0258	0.0028	0.192	0.9085	10.2982	4.4109	98.3751	6.3262	1.6738	8	3.5704	0.0263	0	0.2375	0.003	0.1882	4.0254	0.0102	0.0004	0.2395	1.7861	2.026	4	20.0234	0.442095	16Ca106.
16Ca106.	11	47.8077	31.9319	0.3337	0	2.7891	1.2188	0	0	0.2814	0.3073	10.9523	4.4752	100.097	6.4062	1.5938	8	3.4491	0.0336	0	0.3126	0	0.2435	4.0387	0.0148	0	0.0798	1.8722	1.9521	4	19.9908	0.437871	16Ca106.
16Ca106.	12	46.7274	29.7874	0.2586	0	3.206	1.3631	0.0362	0.0252	0.2869	0.3815	10.9065	4.319	97.2976	6.4879	1.5121	8	3.3623	0.027	0	0.3723	0.0043	0.2821	4.0479	0.0156	0.0037	0.1027	1.9319	2.0383	4	20.0366	0.431082	16Ca106.
16Ca106.	13	46.5092	31.6372	0.3103	0	2.8071	1.2387	0.0207	0.007	0.2869	0.5661	10.7041	4.3869	98.4743	6.3576	1.6424	8	3.4544	0.0319	0	0.3209	0.0024	0.2524	4.0621	0.0154	0.001	0.15	1.8666	2.0177	4	20.0247	0.440258	16Ca106.
16Ca106.	14	46.3444	32.5555	0.2519	0	2.2514	1.0414	0.0142	0.0294	0.2244	0.7306	10.3982	4.3995	98.2409	6.3169	1.6831	8	3.5467	0.0258	0	0.2566	0.0016	0.2116	4.0424	0.012	0.0043	0.1931	1.8081	2.0055	4	20.0169	0.451944	16Ca106.
16Ca106.	15	46.8707	31.9584	0.2786	0	2.3028	1.058	0.0349	0.0168	0.2367	0.8047	10.3885	4.403	98.3532	6.3835	1.6165	8	3.5133	0.0285	0	0.2623	0.004	0.2148	4.023	0.0126	0.0025	0.2125	1.805	2.0199	4	20.0238	0.45022	16Ca106.
16Ca106.	17	46.107	32.0491	0.2803	0	2.4932	1.0845	0.009	0	0.2244	0.5324	10.6752	4.3691	97.8243	6.3283	1.6717	8	3.5126	0.0289	0	0.2862	0.0011	0.2219	4.0506	0.0121	0	0.1417	1.8692	2.0109	4	20.0175	0.436725	16Ca106.
16Ca106.	25	46.4364	30.9249	0.2169	0	2.4379	1.1475	0	0	0.2445	0.5796	10.58	4.3296	96.8974	6.4317	1.5683	8	3.4798	0.0226	0	0.2824	0	0.2369	4.0217	0.0133	0	0.1557	1.8694	2.0251	4	20.0258	0.456191	16Ca106.
16Ca106.	26	46.8686	27.7846	0.1969	0	3.8646	1.8092	0	0	0.2892	0.4664	10.7595	4.2571	96.296	6.602	1.398	8	3.2147	0.0209	0	0.4553	0	0.3799	4.0708	0.016	0	0.1274	1.9335	2.0609	4	20.0464	0.454861	16Ca106.
16Ca106.	27	49.5106	27.9376	0.2269	0	4.4243	1.9501	0.0413	0	0.3015	0.3693	10.8848	4.4374	100.084	6.6909	1.3091	8	3.1405	0.0231	0	0.5	0.0047	0.3929	4.0612	0.016	0	0.0968	1.8766	1.9733	4	20.0026	0.440027	16Ca106.
16Ca106.	28	47.6323	30.4109	0.2453	0	3.4349	1.6599	0	0.0154	0.3383	0.2507	11.2137	4.4188	99.6202	6.4641	1.5359	8	3.3281	0.025	0	0.3898	0	0.3358	4.0788	0.018	0.0022	0.066	1.9414	2.0096	4	20.0239	0.462789	16Ca106.
16Ca106.	29	47.0333	31.2536	0.2436	0	2.8676	1.4477	0	0	0.268	0.2655	11.3558	4.4044	99.1395	6.4036	1.5964	8	3.4186	0.025	0	0.3265	0	0.2938	4.0639	0.0143	0	0.0701	1.9724	2.0425	4	20.0355	0.473642	16Ca106.
16Ca106.	30	48.1522	29.6948	0.2052	0	3.287	1.6069	0	0	0.2501	0.4354	10.8017	4.4048	98.838	6.5554	1.4446	8	3.3199	0.021	0	0.3742	0	0.3261	4.0413	0.0133	0	0.1149	1.876	1.9909	4	20.0088	0.465658	16Ca106.
16Ca106.	31	47.7671	30.598	0.2653	0	3.0889	1.3349	0	0.0014	0.2646	0.5432	10.5042	4.4147	98.7822	6.4884	1.5116	8	3.3869	0.0271	0	0.3509	0	0.2703	4.0352	0.0141	0.0002	0.1431	1.8203	1.9635	4	19.9959	0.435126	16Ca106.
16Ca106.	32	48.0174	29.4756	0.262	0	2.9602	1.4527	0.1136	0.0154	0.2992	0.3545	10.5644	4.3769	97.8918	6.5788	1.4212	8	3.3384	0.027	0	0.3392	0.0132	0.2967	4.0144	0.0161	0.0023	0.0942	1.8465	1.9429	4	19.9887	0.466583	16Ca106.
16Ca106.	33	48.0516	28.2002	0.1869	0	3.4658	1.844	0	0.0252	0.268	0.4165	10.3259	4.3372	97.1213	6.6437	1.3563	8	3.239	0.0194	0	0.4008	0	0.3801	4.0392	0.0145	0.0037	0.1117	1.8213	1.9367	4	19.9847	0.486746	16Ca106.
16Ca106.	34	47.9126	28.3023	0.2486	0	3.9881	1.7694	0	0	0.2814	0.4084	10.6608	4.3463	97.9178	6.6105	1.3895	8	3.2127	0.0258	0	0.4602	0	0.3639	4.0626	0.0152	0	0.1093	1.8764	1.9857	4	20.0081	0.441573	16Ca106.
16Ca106.	36	48.9138	27.6315	0.2152	0	4.5285	1.8025	0.0116	0.007	0.278	0.3451	10.8282	4.3828	98.9442	6.6925	1.3075	8	3.1482	0.0222	0	0.5182	0.0013	0.3677	4.0575	0.0149	0.001	0.0915	1.89	1.9826	4	20.0067	0.415058	16Ca106.
16Ca106.	37	48.9416	27.6466	0.2336	0	4.2892	1.9501	0.022	0	0.2657	0.3276	10.7511	4.3868	98.8142	6.6902	1.3098	8	3.1444	0.024	0	0.4903	0.0025	0.3974	4.0587	0.0142	0	0.0868	1.8749	1.9617	4	19.9951	0.447674	16Ca106.
16Ca106.	38	48.7148	28.1152	0.2436	0	4.0975	1.8888	0	0	0.3562	0.4233	10.6993	4.3902	98.9288	6.6541	1.3459	8	3.1802	0.025	0	0.4681	0	0.3846	4.0579	0.0191	0	0.1121	1.8644	1.9765	4	20.0073	0.451038	16Ca106.
16Ca106.	45	46.6161	31.025	0.272	0	2.7634	1.252	0.0129	0.0056	0.3271	0.6389	10.6415	4.3598	97.9143	6.4118	1.5882	8	3.4411	0.0281	0	0.3179	0.0015	0.2567	4.0454	0.0176	0.0008	0.1704	1.8673	2.0385	4	20.0373	0.446746	16Ca106.
16Ca106.	49	48.5757	28.7066	0.2536	0	3.8724	1.6765	0.031	0	0.259	0.4327	11.0908	4.3989	99.2972	6.622	1.378	8	3.2342	0.026	0	0.4415	0.0036	0.3407	4.0459	0.0138	0	0.1144	1.9288	2.0432	4	20.0354	0.435566	16Ca106.
16Ca106.	50	49.3117	27.127	0.1852	0	3.8724	2.1491	0.0181	0	0.3126	0.5756	10.5692	4.378	98.4989	6.7543	1.2457	8	3.1334	0.0191	0	0.4436	0.0021	0.4388	4.037	0.0168	0	0.1529	1.8469	1.9997	4	20.0166	0.49728	16Ca106.
16Ca106.	51	47.4868	32.085	0.2503	0	2.6438	1.1658	0.009	0.014	0.259	0.3815	11.08	4.4555	99.8306	6.3913	1.6087	8	3.4808	0.0253	0	0.2976	0.001	0.2339	4.0386	0.0137	0.002	0.0995	1.9024	2.004	4	20.0167	0.440075	16Ca106.
16Ca106.	53	46.0128	29.623	0.2603	0	2.9448	1.4195	0.3267	0	0.2869	0.3842	10.7198	4.2731	96.2511	6.4572	1.5428	8	3.3567	0.0275	0	0.3456	0.0388	0.297	4.0656	0.0158	0	0.1045	1.9192	2.0237	4	20.0276	0.462185	16Ca106.
16Ca106.	54	46.5241	29.9707	0.2903	0	2.995	1.4477	0.1382	0	0.2858	0.3505	10.8065	4.319	97.1277	6.4596	1.5404	8	3.3639	0.0303	0	0.3478	0.0162	0.2996	4.0579	0.0156	0	0.0943	1.9141	2.0085	4	20.0198	0.462774	16Ca106.
16Ca106.	55	49.4465	27.4142	0.1235	0	3.8788	2.1375	0.031	0.0308	0.3439	0.3289	10.7981	4.3976	98.9307	6.7427	1.2573	8	3.1486	0.0127	0	0.4423	0.0036	0.4345	4.0417	0.0184	0.0045	0.087	1.8785	1.9699	4	20.0056	0.495552	16Ca106.
16Ca106.	56	48.1457	28.5914	0.1986	0	3.8248	1.7611	0	0	0.2936	0.4758	10.7017	4.3679	98.3605	6.61	1.39	8	3.2363	0.0205	0	0.4392	0	0.3604	4.0564	0.0158	0	0.1267	1.8744	2.001	4	20.0163	0.450725	16Ca106.
Baie Vert Oceanic Tract																																	Baie Vert Oceanic Tract
Mafic rock	lab#	SiO2	Al2O3	TiO2	Fe2O3*	FeO*	MgO	MnO	CaO	BaO	Na2O	K2O	H2O'	sum	Si	Alt	sum	Alo	Ti	Fe3+	Fe2+	Mn	Mg	sum	Ba	Ca	Na	K	sum	OH	O*		Mafic rock
10Ca68.	51	51.3676	26.7397	0.0317	0.0377	2.1261	4.4409	0	0.0294	0.1429	0.1833	10.7619	4.5264	100.388	6.8053	1.1947	8	2.9804	0.0032	0.0038	0.2356	0	0.8771	4.1	0.0074	0.0042	0.0471	1.8189	1.8702	4	19.9425	0.788263	10Ca68.
10Ca68.	52	51.2863	26.6018	0.015	0.5031	1.7858	4.5702	0	0.0322	0.1195	0.0809	11.2064	4.5265	100.728	6.7944	1.2056	8	2.9479	0.0015	0.0502	0.1979	0	0.9026	4.1	0.0062	0.0046	0.0208	1.894	1.9193	4	19.9659	0.820173	10Ca68.
10Ca68.	55	50.33	28.5271	0.035	1.303	1.0815	4.0959	0.0439	0.0308	0.0234	0.0634	11.3341	4.5597	101.428	6.6191	1.3809	8	3.0407	0.0035	0.129	0.119	0.0049	0.803	4.1	0.0012	0.0043	0.0162	1.9016	1.9221	4	19.9623	0.870933	10Ca68.
10Ca68.	64	49.2004	27.8545	0.0284		2.9358	4.9267	0.0491	0.0182	0.0469	0.0458	10.8571	4.4848	100.448	6.5786	1.4214	8	2.9681	0.0029		0.3283	0.0056	0.982	4.2868	0.0026	0.0025	0.0119	1.852	1.8689	4	20	0.749447	10Ca68.
10Ca68.	65	50.4348	27.9962	0.0067		2.6528	4.61	0.0116	0.0028	0.0335	0.1119	11.0908	4.5431	101.494	6.6572	1.3428	8	3.0124	0.0007		0.2928	0.0013	0.9071	4.2143	0.0004	0.0017	0.0286	1.8676	1.8983	4	20	0.75598	10Ca68.
10Ca75.	37	50.0498	31.3651	0.0117	0	2.2038	0.8623	0	0.0965	0.0112	1.6364	9.6284	4.5316	100.397	6.6231	1.3769	8	3.5148	0.0012	0	0.2439	0	0.1701	3.9299	0.0006	0.0137	0.4199	1.6254	2.059	4	20.0369	0.41087	10Ca75.
10Ca75.	38	49.1919	30.3901	0.0234	0	3.2947	1.3896	0.0387	0.0644	0.0246	0.9921	10.256	4.4833	100.149	6.5796	1.4204	8	3.3703	0.0024	0	0.3685	0.0044	0.2771	4.0227	0.0013	0.0092	0.2573	1.75	2.0165	4	20.0142	0.429213	10Ca75.
10Ca80.	37	49.5941	27.7298	0.1018	4.4176	0.7735	3.7742	0.0659	0	0.1965	0.0404	10.6017	4.5597	101.855	6.5223	1.4777	8	2.8204	0.0101	0.4372	0.0851	0.0073	0.74	4.1	0.0101	0	0.0103	1.7787	1.789	4	19.9046	0.896861	10Ca80.
10Ca80.	45	49.6433	26.5772	0.1135	2.7579	2.1318	3.6001	0.0439	0.0028	0.1664	0.0836	11.1414	4.4759	100.738	6.6511	1.3489	8	2.8476	0.0114	0.278	0.2389	0.005	0.719	4.1	0.0087	0.0004	0.0217	1.9043	1.9264	4	19.9719	0.7506	10Ca80.
10Ca80.	47	50.392	27.4652	0.0868	1.3291	2.9286	3.3365	0.0426	0.0042	0.1239	0.0741	11.4606	4.5241	101.768	6.6795	1.3205	8	2.9701	0.0087	0.1326	0.3246	0.0048	0.6593	4.1	0.0064	0.0006	0.0191	1.938	1.9576	4	19.9852	0.670088	10Ca80.
10Ca80.	49	49.8487	27.4785	0.1034	1.2351	3.2975	3.0065	0.0607	0.0112	0.1887	0.0728	11.451	4.4867	101.241	6.6625	1.3375	8	2.9909	0.0104	0.1242	0.3686	0.0069	0.599	4.1	0.0099	0.0016	0.0189	1.9525	1.9729	4	19.9964	0.619057	10Ca80.
10Ca80.	50	49.7395	27.1459	0.1118	2.1903	2.7159	3.2685	0.0258	0.0336	0.1697	0.0917	11.0884	4.4916	101.073	6.6406	1.3594	8	2.912	0.0112	0.2201	0.3032	0.0029	0.6505	4.1	0.0089	0.0048	0.0237	1.8886	1.9171	4	19.9674	0.68208	10Ca80.
10Ca82.	5	48.9116	27.6825	0.0534	2.8702	0.6812	3.9401	0.0297	0.0098	0.0502	0.1483	10.662	4.4705	99.5095	6.5609	1.4391	8	2.9372	0.0054	0.2897	0.0764	0.0034	0.7879	4.1	0.0026	0.0014	0.0386	1.8245	1.8645	4	19.9349	0.911605	10Ca82.
10Ca82.	7	51.8104	27.2687	0.045	0	2.5563	3.5421	0.0013	0.042	0.1842	0.2925	10.8884	4.5493	101.18	6.8293	1.1707	8	3.0656	0.0045	0	0.2818	0.0001	0.696	4.0481	0.0095	0.0059	0.0748	1.831	1.9117	4	19.9683	0.711802	10Ca82.
10Ca82.	22	49.9299	28.051	0.0567	1.0027	1.9332	3.688	0.04	0.0126	0.0815	0.1092	11.4715	4.5067	100.883	6.6437	1.3563	8	3.0427	0.0057	0.1004	0.2151	0.0045	0.7316	4.1	0.0042	0.0018	0.0282	1.9473	1.9772	4	19.9929	0.77279	10Ca82.
10Ca82.	23	50.7022	27.1535	0.0584	0	2.7055	3.7676	0.0103	0.049	0.2322	0.0634	11.0872	4.4942	100.323	6.7653	1.2347	8	3.0354	0.0059	0	0.3019	0.0012	0.7494	4.0938	0.0121	0.007	0.0164	1.8873	1.9107	4	19.971	0.712832	10Ca82.
10Ca82.	24	47.5574	28.0737	0.0684	1.7754	1.2405	3.4061	0	0.028	0.1128	0.1294	11.133	4.3685	97.893	6.5283	1.4717	8	3.0701	0.0071	0.1834	0.1424	0	0.697	4.1	0.0061	0.0041	0.0344	1.9496	1.9882	4	20.0002	0.830355	10Ca82.
10Ca82.	56	49.3951	26.6509	0.0701	0.2001	2.6773	3.6482	0	0.007	0.2233	0.1038	10.7728	4.3952	98.1437	6.7393	1.2607	8	3.0248	0.0072	0.0205	0.3055	0	0.742	4.1	0.0119	0.001	0.0275	1.8751	1.9035	4	19.9637	0.708353	10Ca82.
10Ca82.	62	48.1457	28.376	0.0667	0	2.1768	3.0977	0.0362	0.0364	0.0748	0.2386	10.4897	4.3697	97.1082	6.6071	1.3929	8	3.1966	0.0069	0	0.2498	0.0042	0.6337	4.0912	0.004	0.0053	0.0635	1.8364	1.9053	4	19.9593	0.717261	10Ca82.
10Ca82.	63	47.75	26.1936	0.0918	2.1764	0.926	4.0429	0.0207	0.049	0.115	0.1281	10.5463	4.3189	96.3585	6.6299	1.3701	8	2.9162	0.0096	0.2274	0.1075	0.0024	0.8368	4.1	0.0063	0.0073	0.0345	1.8681	1.9098	4	19.9612	0.886159	10Ca82.
10Ca82.	64	48.8239	28.2078	0.0617	0.1711	2.2724	3.3514	0	0.0168	0.1597	0.1294	10.721	4.4177	98.3329	6.6274	1.3726	8	3.1401	0.0063	0.0175	0.258	0	0.6782	4.1	0.0085	0.0024	0.0341	1.8565	1.893	4	19.955	0.724418	10Ca82.
10Ca82.	65	49.9941	26.9589	0.0517	0	2.4662	2.9882	0.0013	0.1371	0.0837	1.0689	9.8163	4.4045	97.9711	6.8066	1.1934	8	3.1324	0.0053	0	0.2808	0.0001	0.6065	4.0252	0.0045	0.02	0.2822	1.705	2.0072	4	20.018	0.683534	10Ca82.
10Ca82.	77	47.9725	31.3405	0.015	0	2.1086	1.9667	0.0194	0.0196	0.0916	0.155	11.033	4.4571	99.1789	6.4543	1.5457	8	3.4239	0.0015	0	0.2373	0.0022	0.3945	4.0594	0.0048	0.0028	0.0404	1.8937	1.937	4	19.9747	0.624406	10Ca82.
10Ca82.	78	50.161	27.2517	0.0584	0	2.6785	3.5736	0.0594	0	0.2222	0.0849	11.1751	4.4605	99.7253	6.7436	1.2564	8	3.0615	0.0059	0	0.3011	0.0068	0.7162	4.0915	0.0117	0	0.0221	1.9166	1.9388	4	19.9811	0.70402	10Ca82.
10Ca82.	83	48.8624	27.7241	0.0751	0.3639	2.2584	3.4608	0	0.014	0.1585	0.0997	11.1426	4.4066	98.5662	6.6494	1.3506	8	3.0959	0.0077	0.0373	0.257	0	0.7021	4.1	0.0085	0.002	0.0263	1.9344	1.9628	4	19.9899	0.73204	10Ca82.
10Ca82.	103	49.1384	26.8304	0.0634	0	2.5576	3.5686	0.0077	0.0378	0.201	0.1658	10.9342	4.3767	97.8815	6.7326	1.2674	8	3.0652	0.0065	0	0.2931	0.0009	0.7289	4.0946	0.0108	0.0055	0.044	1.9112	1.9608	4	19.994	0.713209	10Ca82.
10Ca84.	50	48.8367	27.4785	0.1034	1.0965	4.1645	2.3299	0.0077	0.014	0.0592	0.2521	11.1028	4.4151	99.8604	6.6331	1.3669	8	3.0317	0.0106	0.1121	0.473	0.0009	0.4717	4.1	0.0031	0.002	0.0664	1.9238	1.9922	4	19.9993	0.499312	10Ca84.
10Ca84.	51	49.0207	27.5767	0.0901	0.09	4.616	2.2586	0.0207	0.0336	0.0413	0.55	10.9438	4.4059	99.6474	6.6719	1.3281	8	3.0955	0.0092	0.0092	0.5254	0.0024	0.4583	4.1	0.0022	0.0049	0.1451	1.9002	2.0502	4	20.0273	0.465894	10Ca84.
10Ca84.	52	49.8101	27.2933	0.1151	0	4.8449	2.1143	0.0775	0.0476	0.0826	0.6726	10.8451	4.435	100.338	6.7348	1.2652	8	3.0842	0.0117	0	0.5479	0.0089	0.4262	4.0788	0.0044	0.0069	0.1763	1.8707	2.0539	4	20.0348	0.437532	10Ca84.
10Ca84.	54	49.2775	27.2555	0.1318	0.8365	4.5155	2.3431	0	0.0056	0.0648	0.2211	11.027	4.4305	100.109	6.6697	1.3303	8	3.0175	0.0134	0.0852	0.5111	0	0.4728	4.1	0.0034	0.0008	0.058	1.904	1.9628	4	19.9849	0.480537	10Ca84.
10Ca84.	57	48.0837	27.3916	0.1118	2.1695	3.6583	2.2768	0.0077	0.0028	0.0313	0.1092	11.3245	4.3881	99.5552	6.5709	1.4291	8	2.9826	0.0115	0.2231	0.4181	0.0009	0.4638	4.1	0.0017	0.0004	0.0289	1.9743	2.0036	4	20.0035	0.52591	10Ca84.
10Ca84.	73	49.1577	27.4123	0.1368	1.0242	4.3145	2.3398	0.0607	0.0392	0.0134	0.2143	10.9583	4.4349	100.106	6.6469	1.3531	8	3.0154	0.0139	0.1042	0.4879	0.007	0.4717	4.1	0.0007	0.0057	0.0562	1.8903	1.9522	4	19.9768	0.491559	10Ca84.
10Ca84.	74	48.3982	27.316	0.1301	1.9346	3.8684	2.2652	0.0775	0.0224	0.0782	0.0755	11.4498	4.402	100.018	6.5931	1.4069	8	2.9787	0.0133	0.1983	0.4407	0.0089	0.46	4.1	0.0042	0.0033	0.0199	1.9898	2.013	4	20.0107	0.510714	10Ca84.
10Ca84.	75	49.1534	26.307	0.1218	3.9182	2.8271	2.9683	0.0568	0.0056	0.086	0.7468	9.6091	4.4621	100.262	6.6058	1.3942	8	2.7725	0.0123	0.3963	0.3177	0.0065	0.5947	4.1	0.0045	0.0008	0.1946	1.6475	1.8428	4	19.926	0.651797	10Ca84.
10Ca84.	76	48.7191	28.0151	0.0984	1.4392	3.7609	2.315	0.0323	0	0.0257	0.0553	11.1257	4.4364	100.023	6.5853	1.4147	8	3.0483	0.01	0.1464	0.4251	0.0037	0.4665	4.1	0.0014	0	0.0145	1.9185	1.933	4	19.9679	0.523217	10Ca84.
10Ca84.	81	47.2643	27.4955	0.0984	1.6775	3.3689	2.2967	0	0.0028	0.0313	0.0984	11.31	4.3239	97.9678	6.5549	1.4451	8	3.0491	0.0103	0.1751	0.3907	0	0.4748	4.1	0.0017	0.0004	0.0265	2.001	2.0279	4	20.0157	0.548585	10Ca84.
10Ca84.	83	49.6604	26.1804	0.1135	0	5.3673	2.315	0.0232	0.042	0.0938	1.2172	9.6176	4.3899	99.0202	6.7836	1.2164	8	2.9984	0.0117	0	0.6132	0.0027	0.4714	4.0973	0.005	0.0061	0.3224	1.676	2.0045	4	20.0103	0.43463	10Ca84.
10Ca84.	85	48.9138	26.4412	0.1001	0	4.9646	2.1524	0.0077	0.0252	0.0759	0.6093	10.5511	4.343	98.1843	6.7538	1.2462	8	3.0567	0.0104	0	0.5733	0.0009	0.4431	4.0843	0.0041	0.0037	0.1631	1.8586	2.0254	4	20.0187	0.43595	10Ca84.
10Ca85.	64	47.981	34.3807	0.1869	0	1.922	0.854	0.0478	0	0.0089	0.368	10.3018	4.5673	100.618	6.2997	1.7003	8	3.6198	0.0185	0	0.211	0.0053	0.1672	4.0218	0.0005	0	0.0937	1.7255	1.8192	4	19.9101	0.442094	10Ca85.
10Ca85.	70	43.7515	32.4383	0.1752	2.8829	0.9657	1.3333	0.0542	0	0.0346	0.364	9.8211	4.3178	96.1386	6.0763	1.9237	8	3.3858	0.0183	0.3013	0.1122	0.0064	0.276	4.1	0.0019	0	0.098	1.7401	1.8381	4	19.9209	0.710974	10Ca85.
10Ca85.	72	45.5443	33.3717	0.1185	3.0519	1.3411	1.2968	0.0387	0.014	0.0179	0.337	9.6657	4.4776	99.2751	6.0996	1.9004	8	3.367	0.0119	0.3076	0.1502	0.0044	0.2589	4.1	0.0009	0.002	0.0875	1.6514	1.7409	4	19.8714	0.632853	10Ca85.
10Ca85.	74	45.5636	33.1601	0.1535	1.3337	2.2336	1.1625	0	0.0182	0.0491	0.3195	9.9512	4.4288	98.3738	6.1693	1.8307	8	3.4609	0.0156	0.1359	0.2529	0	0.2346	4.1	0.0026	0.0026	0.0839	1.7189	1.8054	4	19.9053	0.481231	10Ca85.
10Ca85.	77	46.9242	33.2206	0.1735	0	2.4122	1.0447	0.0659	0	0.0045	0.2858	10.1825	4.468	98.7818	6.2978	1.7022	8	3.5525	0.0175	0	0.2708	0.0075	0.209	4.0573	0.0002	0	0.0744	1.7434	1.8178	4	19.9091	0.435598	10Ca85.
10Ca85.	83	46.1455	30.4449	0.1568	2.7924	2.3941	1.6633	0.0439	0.0658	0.0078	1.4598	8.0371	4.3991	97.6105	6.2903	1.7097	8	3.1815	0.0161	0.2864	0.2729	0.0051	0.338	4.1	0.0004	0.0096	0.3858	1.3977	1.7931	4	19.897	0.553282	10Ca85.
10Ca85.	95	47.8762	35.127	0.1268	0	2.3594	0.9286	0.0374	0.0182	0.0212	0.3842	9.9826	4.6098	101.471	6.228	1.772	8	3.6135	0.0124	0	0.2567	0.0041	0.1801	4.0668	0.0011	0.0025	0.0969	1.6566	1.7561	4	19.8804	0.412317	10Ca85.
10Ca85.	100	46.3615	31.9017	0.1118	2.9571	2.0709	1.4709	0.0517	0.0294	0.0402	0.9247	9.1731	4.4721	99.565	6.2166	1.7834	8	3.2582	0.0113	0.2984	0.2322	0.0059	0.294	4.1	0.0021	0.0042	0.2404	1.5692	1.8138	4	19.909	0.558723	10Ca85.
10Ca91.	93	49.7117	29.1582	0.0617	0	2.3684	2.8075	0.0052	0.0504	0.1228	0.0661	11.4088	4.4899	100.251	6.6394	1.3606	8	3.2292	0.0062	0	0.2645	0.0006	0.559	4.0595	0.0064	0.0072	0.0171	1.9439	1.9682	4	19.9941	0.67881	10Ca91.
10Ca91.	94	50.8563	28.4704	0.0784	0	2.2514	2.8257	0.0555	0.0322	0.096	0.2453	10.5572	4.5205	99.9889	6.7464	1.2536	8	3.1976	0.0078	0	0.2498	0.0062	0.5588	4.0202	0.005	0.0046	0.0631	1.7866	1.8543	4	19.9344	0.691071	10Ca91.
10Ca91.	95	49.3459	28.495	0.0751	2.4099	1.4775	3.5238	0	0.084	0.1686	0.093	11.3679	4.5241	101.565	6.5407	1.4593	8	2.9921	0.0075	0.2404	0.1638	0	0.6963	4.1	0.0088	0.0119	0.0239	1.9222	1.9581	4	19.9878	0.809557	10Ca91.
10Ca91.	97	49.7781	27.607	0.0534	1.6895	1.6973	3.7875	0.0504	0.0308	0.1329	0.1874	10.9101	4.4967	100.421	6.6382	1.3618	8	2.9772	0.0054	0.1695	0.1893	0.0057	0.753	4.1	0.0069	0.0044	0.0484	1.8561	1.9089	4	19.9614	0.799109	10Ca91.
10Ca91.	98	51.3975	27.5881	0.0784	0	2.7492	3.3729	0.0529	0.1203	0.1641	0.7319	10.662	4.5419	101.459	6.7859	1.2141	8	3.0787	0.0078	0	0.3036	0.0059	0.6639	4.0599	0.0085	0.017	0.1874	1.7958	2.0002	4	20.0171	0.686202	10Ca91.
10Ca91.	102	51.1151	27.8337	0.0667	0	2.7788	3.2967	0.0542	0.1217	0.1373	0.5122	11.1836	4.5352	101.635	6.7587	1.2413	8	3.0961	0.0066	0	0.3073	0.0061	0.6498	4.066	0.0071	0.0172	0.1313	1.8865	2.035	4	20.0333	0.678926	10Ca91.
10Ca91.	104	49.6604	27.2177	0.0501	0.5168	2.4914	3.6366	0	0.0448	0.1451	0.1186	11.0896	4.4439	99.415	6.7011	1.2989	8	3.0297	0.0051	0.0525	0.2812	0	0.7315	4.1	0.0077	0.0065	0.031	1.909	1.9465	4	19.981	0.722326	10Ca91.
10Ca91.	105	49.9471	28.3495	0.0651	0.267	2.738	3.2801	0.0387	0	0.1664	0.0917	11.1655	4.501	100.61	6.6544	1.3456	8	3.1058	0.0065	0.0268	0.3051	0.0044	0.6515	4.1	0.0087	0	0.0237	1.8977	1.9214	4	19.9694	0.681058	10Ca91.
10Ca91.	106	50.1289	28.427	0.0417	0	2.9731	3.2021	0.0439	0.0644	0.1798	0.1321	11.1233	4.5081	100.824	6.6681	1.3319	8	3.1246	0.0042	0	0.3307	0.0049	0.635	4.0995	0.0094	0.0092	0.0341	1.8876	1.9308	4	19.9794	0.657554	10Ca91.
10Ca91.	107	50.7664	29.1299	0.0501	0	2.6116	2.4509	0	0.0406	0.1273	0.7387	10.8125	4.5387	101.267	6.7074	1.2926	8	3.2434	0.005	0	0.2886	0	0.4827	4.0197	0.0066	0.0057	0.1892	1.8225	2.0175	4	20.0182	0.625827	10Ca91.
10Ca91.	108	52.4116	27.5068	0.03	0	2.5408	2.9036	0.0336	0.1175	0.1474	1.383	10.2054	4.5682	101.848	6.8799	1.1201	8	3.1355	0.003	0	0.2789	0.0037	0.5682	3.9893	0.0076	0.0165	0.352	1.709	2.0775	4	20.0546	0.670759	10Ca91.
10Ca91.	109	50.0134	29.6003	0.0434	0	2.8727	2.3531	0.0504	0.0266	0.2032	0.1334	11.1787	4.5224	100.998	6.6316	1.3684	8	3.2574	0.0043	0	0.3186	0.0057	0.4651	4.0511	0.0106	0.0038	0.0343	1.891	1.9291	4	19.977	0.593467	10Ca91.
10Ca91.	117	50.8028	27.4936	0.0434	0	2.3877	3.1806	0.0504	0.0882	0.153	0.5608	10.4536	4.4848	99.6987	6.7928	1.2072	8	3.1254	0.0044	0	0.267	0.0057	0.634	4.0365	0.008	0.0126	0.1454	1.7831	1.9411	4	19.9849	0.703663	10Ca91.
10Ca91.	118	49.348	29.264	0.0467	0	3.0065	2.4907	0.0142	0.0616	0.1831	0.0768	11.557	4.4758	100.525	6.6116	1.3884	8	3.2325	0.0047	0	0.3369	0.0016	0.4975	4.0732	0.0096	0.0088	0.02	1.9753	2.0041	4	20.0161	0.596237	10Ca91.
10Ca91.	119	48.6656	28.956	0.0367	0	2.6618	2.6997	0.0194	0.0644	0.1742	0.1065	11.204	4.4216	99.0098	6.6001	1.3999	8	3.2284	0.0037	0	0.3019	0.0022	0.5458	4.082	0.0093	0.0094	0.028	1.9385	1.9758	4	20.0018	0.64386	10Ca91.
10Ca91.	127	47.7521	32.3212	0.0434	0	1.3161	1.6135	0.0271	0.1203	0.1474	0.5217	10.6029	4.4614	98.9271	6.4184	1.5816	8	3.5385	0.0044	0	0.1479	0.0031	0.3233	4.0172	0.0078	0.0173	0.1359	1.8181	1.9714	4	20.0021	0.686121	10Ca91.
10Ca91.	128	48.6635	28.2645	0.0284	1.5752	1.8555	3.3	0.0155	0.0364	0.1329	0.12	11.2462	4.4438	99.6816	6.5669	1.4331	8	3.0621	0.0029	0.16	0.2094	0.0018	0.6639	4.1	0.007	0.0053	0.0314	1.9361	1.9727	4	19.9934	0.76022	10Ca91.
10Ca91.	130	49.455	27.5824	0.045	1.4458	1.9372	3.6515	0.0077	0.0476	0.1619	0.0849	11.0197	4.468	99.9068	6.6375	1.3625	8	3.0005	0.0045	0.146	0.2174	0.0009	0.7306	4.1	0.0085	0.0068	0.0221	1.8868	1.9157	4	19.9664	0.770675	10Ca91.
10Ca91.	139	49.316	27.3708	0.0467	0	2.874	3.2187	0.071	0.0672	0.1496	0.465	10.9595	4.4076	98.9461	6.7096	1.2904	8	3.0984	0.0048	0	0.327	0.0082	0.6528	4.0912	0.008	0.0098	0.1227	1.9022	2.0347	4	20.0302	0.666258	10Ca91.
10Ca91.	140	49.0742	32.8729	0.0684	0	0.8092	1.0033	0.0065	0.1833	0.0882	1.0689	10.5282	4.5273	100.23	6.5002	1.4998	8	3.6319	0.0068	0	0.0896	0.0007	0.1981	3.9272	0.0046	0.026	0.2745	1.779	2.0796	4	20.0574	0.688564	10Ca91.
10Ca91.	142	47.0504	35.3141	0.0684	0	1.1218	0.6169	0.0039	0.07	0.0569	0.2305	11.2317	4.5259	100.29	6.234	1.766	8	3.7485	0.0068	0	0.1243	0.0004	0.1218	4.0019	0.003	0.0099	0.0592	1.8985	1.9676	4	19.9917	0.494921	10Ca91.
10Ca91.	190	48.4624	31.4426	0.0517	0	2.6052	1.8606	0	0.0406	0.1407	0.1173	11.2245	4.4986	100.444	6.46	1.54	8	3.3997	0.0052	0	0.2904	0	0.3697	4.065	0.0073	0.0058	0.0303	1.9088	1.9449	4	19.9827	0.560067	10Ca91.
Felsic rock	lab#	SiO2	Al2O3	TiO2	Fe2O3*	FeO*	MgO	MnO	CaO	BaO	Na2O	K2O	H2O'	sum	Si	Alt	sum	Alo	Ti	Fe3+	Fe2+	Mn	Mg	sum	Ba	Ca	Na	K	sum	OH	O*		Felsic rock
.10Ca88.	57	47.7414	29.6192	0.6807	0	4.1824	1.3797	0.0026	0.0266	0.2423	0.279	10.0103	4.4097	98.5739	6.4922	1.5078	8	3.2393	0.0696	0	0.4757	0.0003	0.2797	4.0646	0.0129	0.0039	0.0736	1.7366	1.8141	4	19.9219	0.370267	.10Ca88.
.10Ca88.	63	47.8698	29.5304	0.7792	0	4.9479	1.3415	0	0.0224	0.2735	0.182	10.7282	4.4334	100.108	6.4749	1.5251	8	3.1825	0.0793	0	0.5597	0	0.2705	4.092	0.0145	0.0032	0.0477	1.8512	1.9022	4	19.9672	0.325825	.10Ca88.
.10Ca88.	67	47.5146	29.2451	0.7992	0	4.8025	1.446	0.0594	0.0336	0.2512	0.1752	10.8282	4.402	99.5571	6.4727	1.5273	8	3.1681	0.0819	0	0.5471	0.0069	0.2937	4.0977	0.0134	0.0049	0.0463	1.8818	1.933	4	19.9824	0.34931	.10Ca88.
.10Ca88.	71	47.8954	28.9636	0.6641	0.1154	4.9174	1.5372	0.0491	0.0056	0.2747	0.1348	11.1065	4.4139	100.078	6.507	1.493	8	3.1446	0.0679	0.0118	0.5587	0.0056	0.3113	4.1	0.0146	0.0008	0.0355	1.925	1.9613	4	19.9953	0.357816	.10Ca88.
.10Ca88.	72	46.6846	29.4152	0.8142	0.4244	4.6161	1.3051	0.0168	0.0252	0.2166	0.2157	11.1643	4.3664	99.2645	6.4115	1.5885	8	3.1727	0.0841	0.0439	0.5302	0.002	0.2672	4.1	0.0117	0.0037	0.0574	1.956	2.0172	4	20.0202	0.335089	.10Ca88.
.10Ca88.	73	46.1412	29.0524	0.7708	0.0959	4.7291	1.2586	0	0.028	0.2043	0.2049	11.3028	4.3049	98.093	6.4273	1.5727	8	3.1969	0.0808	0.0101	0.5509	0	0.2614	4.1	0.0112	0.0042	0.0553	2.0086	2.0681	4	20.0452	0.321802	.10Ca88.
.10Ca88.	76	47.3371	28.8257	0.8092	0	4.7472	1.4029	0	0	0.2378	0.151	10.7451	4.3665	98.6224	6.5009	1.4991	8	3.1666	0.0836	0	0.5452	0	0.2872	4.0826	0.0128	0	0.0402	1.8825	1.9227	4	19.9742	0.345026	.10Ca88.
.10Ca88.	78	47.1616	29.6136	0.7725	0.0065	4.7452	1.3283	0.0465	0	0.2177	0.1402	11.1884	4.3928	99.6132	6.4381	1.5619	8	3.2026	0.0793	0.0007	0.5417	0.0054	0.2703	4.1	0.0116	0	0.0371	1.9485	1.9856	4	20.0044	0.332882	.10Ca88.
.10Ca88.	79	46.5156	30.1086	0.8509	0.7361	4.1801	1.2785	0.022	0.0084	0.2088	0.2319	11.1522	4.3917	99.6846	6.3515	1.6485	8	3.1968	0.0874	0.0756	0.4773	0.0025	0.2603	4.1	0.0112	0.0012	0.0614	1.9427	2.0053	4	20.0138	0.352901	.10Ca88.
.10Ca88.	80	47.1189	29.5153	0.8326	0	4.6288	1.2802	0	0.0126	0.2155	0.1739	11.1245	4.3818	99.284	6.4484	1.5516	8	3.2089	0.0857	0	0.5298	0	0.2612	4.0856	0.0116	0.0018	0.0461	1.9422	1.9902	4	20.0076	0.330215	.10Ca88.
.10Ca88.	81	46.9499	29.366	0.8359	0	4.8797	1.2951	0.0155	0.0098	0.2412	0.2035	11.2811	4.3718	99.4495	6.44	1.56	8	3.1874	0.0863	0	0.5598	0.0018	0.2648	4.1	0.013	0.0014	0.0541	1.9741	2.0296	4	20.0285	0.321125	.10Ca88.
.10Ca88.	82	46.4364	29.8894	0.7758	0.0298	4.4888	1.2371	0.0323	0.0098	0.23	0.1442	11.5341	4.356	99.1637	6.3926	1.6074	8	3.2421	0.0804	0.0031	0.5168	0.0038	0.2539	4.1	0.0124	0.0014	0.0385	2.0256	2.0656	4	20.0452	0.329441	.10Ca88.
.10Ca88.	83	46.9392	28.9976	0.7008	0	4.8604	1.315	0.0232	0	0.1708	0.12	11.1402	4.3473	98.6144	6.4747	1.5253	8	3.1889	0.0727	0	0.5607	0.0027	0.2704	4.0955	0.0092	0	0.0321	1.9604	1.9925	4	20.0055	0.325352	.10Ca88.
.10Ca88.	86	47.1146	29.2961	0.7959	0	4.7163	1.2885	0	0	0.2121	0.1442	11.0848	4.3714	99.0239	6.4632	1.5368	8	3.1997	0.0821	0	0.5411	0	0.2635	4.0864	0.0114	0	0.0384	1.9399	1.9783	4	20.0005	0.327492	.10Ca88.
.10Ca88.	87	47.0311	29.2338	0.8176	0	4.54	1.315	0.0194	0.0154	0.211	0.2467	10.6608	4.3618	98.4525	6.4659	1.5341	8	3.2028	0.0846	0	0.522	0.0023	0.2695	4.0811	0.0114	0.0023	0.0658	1.8698	1.9378	4	19.9814	0.340493	.10Ca88.
.10Ca88.	88	45.8502	28.8219	0.7625	0.4044	4.4026	1.3614	0.0362	0.035	0.2211	0.1146	10.9908	4.2838	97.2845	6.4183	1.5817	8	3.1733	0.0803	0.0426	0.5154	0.0043	0.2841	4.1	0.0121	0.0052	0.0311	1.9627	1.9991	4	20.0117	0.355347	.10Ca88.
.10Ca88.	89	47.0162	29.0052	0.8609	0	4.6841	1.3664	0.0065	0	0.2646	0.1415	10.8583	4.3565	98.5603	6.4716	1.5284	8	3.177	0.0892	0	0.5392	0.0008	0.2804	4.0865	0.0143	0	0.0378	1.9067	1.9445	4	19.9865	0.342118	.10Ca88.
.10Ca88.	93	45.4994	29.2432	0.7558	0.7425	4.3055	1.1575	0.0452	0.0224	0.1876	0.155	11.2052	4.2847	97.604	6.3679	1.6321	8	3.1914	0.0796	0.0782	0.5039	0.0054	0.2415	4.1	0.0103	0.0034	0.0421	2.0006	2.0461	4	20.0333	0.323987	.10Ca88.
.10Ca88.	94	46.1883	28.8823	0.7091	0	4.6443	1.3167	0	0.0098	0.2255	0.1914	10.1813	4.2933	96.642	6.4513	1.5487	8	3.2058	0.0745	0	0.5425	0	0.2742	4.097	0.0123	0.0015	0.0518	1.8142	1.8675	4	19.9468	0.335741	.10Ca88.
.10Ca88.	96	46.4642	29.7609	0.8409	0.5026	4.2666	1.3183	0.0555	0	0.1898	0.1806	11.1125	4.3677	99.0598	6.3793	1.6207	8	3.195	0.0869	0.0519	0.4899	0.0065	0.2698	4.1	0.0102	0	0.0481	1.9464	1.9945	4	20.0074	0.35514	.10Ca88.
.10Ca88.	97	47.5082	28.7255	0.6557	0	4.5876	1.393	0	0.0476	0.2054	0.4704	10.1307	4.3604	98.0846	6.5336	1.4664	8	3.1895	0.0678	0	0.5276	0	0.2856	4.0706	0.0111	0.007	0.1254	1.7774	1.9098	4	19.9695	0.351205	.10Ca88.
.10Ca88.	98	48.0602	29.2508	0.8292	0	4.7163	1.2304	0.0594	0	0.2155	0.1671	11.3474	4.4235	100.3	6.5152	1.4848	8	3.1887	0.0846	0	0.5347	0.0068	0.2487	4.0635	0.0114	0	0.0439	1.9625	2.0064	4	20.0146	0.317462	.10Ca88.
.10Ca88.	99	47.7029	29.1336	0.6807	0	4.6957	1.4775	0.0413	0.0252	0.2445	0.1739	10.8993	4.4004	99.475	6.5008	1.4992	8	3.18	0.0698	0	0.5352	0.0048	0.3002	4.0898	0.0131	0.0037	0.0459	1.8949	1.9445	4	19.9871	0.359349	.10Ca88.
.10Ca88.	100	48.5223	29.0448	0.7258	0	4.7317	1.2901	0.0323	0.0042	0.1753	0.6268	10.4427	4.4373	100.033	6.5574	1.4426	8	3.1835	0.0738	0	0.5348	0.0037	0.2599	4.0557	0.0093	0.0006	0.1642	1.8004	1.9652	4	19.9922	0.327042	.10Ca88.
11Ca101a.	21	46.0999	30.04	0.3501	0.5533	3.3321	1.59	0.05	0	0.1	0.36	10.5301	4.3306	97.3361	6.3835	1.6165	8	3.2859	0.0365	0.0577	0.3859	0.0059	0.3282	4.1	0.0054	0	0.0967	1.8601	1.9568	4	19.9838	0.459599	11Ca101a.
11Ca101a.	22	46.04	29.5501	0.43	0	3.64	1.58	0.02	0	0.1	0.43	10.62	4.2943	96.7445	6.4292	1.5709	8	3.2925	0.0452	0	0.4251	0.0024	0.3289	4.094	0.0055	0	0.1164	1.8919	2.0083	4	20.0163	0.436207	11Ca101a.
11Ca101a.	23	45.41	30.03	0.5301	0.8658	3.1109	1.5599	0.0099	0.0099	0.12	0.37	10.3	4.3012	96.6678	6.331	1.669	8	3.2654	0.0556	0.0908	0.3627	0.0012	0.3242	4.1	0.0066	0.0015	0.1	1.832	1.9335	4	19.9816	0.471976	11Ca101a.
11Ca101a.	24	45.4799	29.9601	0.61	0.3194	3.4726	1.5001	0	0.0099	0.1499	0.38	10.37	4.2933	96.5953	6.3524	1.6476	8	3.2843	0.0641	0.0336	0.4056	0	0.3123	4.1	0.0082	0.0015	0.1029	1.8478	1.9522	4	19.9926	0.435019	11Ca101a.
11Ca101a.	25	46.2101	29.5401	0.42	0.2623	3.5839	1.6899	0	0	0.06	0.42	10.44	4.3144	97.0007	6.4229	1.5771	8	3.2619	0.0439	0.0274	0.4166	0	0.3502	4.1	0.0033	0	0.1132	1.8512	1.9644	4	19.9954	0.456703	11Ca101a.
11Ca101a.	26	45.1201	29.6701	0.3501	4.8206	0.8624	2.1601	0.02	0	0.03	0.3501	10.24	4.3581	98.0416	6.2084	1.7916	8	3.02	0.0362	0.4992	0.0992	0.0023	0.4431	4.1	0.0016	0	0.0934	1.7975	1.8909	4	19.9569	0.817075	11Ca101a.
11Ca101a.	27	45.89	29.2701	0.3701	1.2395	3.2347	1.71	0	0	0.09	0.47	10.02	4.3043	96.5988	6.3932	1.6068	8	3.1992	0.0388	0.1299	0.3769	0	0.3551	4.1	0.0049	0	0.127	1.7809	1.9078	4	19.9588	0.485109	11Ca101a.
11Ca101a.	28	45.8299	29.5799	0.3899	1.347	3.0879	1.68	0.0099	0	0.09	0.36	9.99	4.3163	96.691	6.3671	1.6329	8	3.2105	0.0408	0.1408	0.3588	0.0012	0.3479	4.1	0.0049	0	0.097	1.7706	1.8676	4	19.9403	0.492288	11Ca101a.
11Ca101a.	29	46.35	29.25	0.3701	1.1586	3.2775	1.82	0	0.0099	0.1	0.49	10.17	4.3328	97.3389	6.4148	1.5852	8	3.1859	0.0385	0.1207	0.3794	0	0.3755	4.1	0.0054	0.0015	0.1315	1.7956	1.9286	4	19.9713	0.497417	11Ca101a.
11Ca101a.	32	46.15	29.46	0.47	0.3299	3.4231	1.75	0.06	0	0.11	0.31	10.41	4.3114	96.8144	6.4189	1.5811	8	3.2482	0.0492	0.0345	0.3982	0.0071	0.3629	4.1	0.006	0	0.0836	1.8471	1.9307	4	19.9763	0.47681	11Ca101a.
11Ca101a.	33	46.35	29.9899	0.3501	0.3803	3.5679	1.5701	0.03	0	0.03	0.39	10.44	4.3411	97.4692	6.4026	1.5974	8	3.2851	0.0364	0.0395	0.4122	0.0035	0.3233	4.1	0.0016	0	0.1044	1.8398	1.9442	4	19.9786	0.439565	11Ca101a.
11Ca101a.	36	45.77	29.8299	0.45	0.7065	3.3942	1.5701	0	0.04	0.06	0.33	10.5401	4.3105	97.0412	6.3675	1.6325	8	3.2584	0.0471	0.074	0.3949	0	0.3256	4.1	0.0033	0.006	0.089	1.8706	1.9656	4	19.9927	0.451908	11Ca101a.
11Ca101a.	38	45.88	29.87	0.31	0.5694	3.3177	1.6001	0.02	0.0099	0.09	0.34	10.5101	4.3078	96.8248	6.3867	1.6133	8	3.2872	0.0325	0.0596	0.3862	0.0024	0.332	4.1	0.0049	0.0015	0.0918	1.8665	1.9597	4	19.9848	0.462267	11Ca101a.
11Ca101a.	39	45.7101	29.1601	0.43	1.0128	3.2187	1.7599	0.0099	0.0299	0.0801	0.47	10.2	4.2862	96.3678	6.3951	1.6049	8	3.2033	0.0453	0.1066	0.3766	0.0012	0.3671	4.1	0.0044	0.0045	0.1275	1.8205	1.9525	4	19.9806	0.493613	11Ca101a.
11Ca101a.	40	46.1799	29.5501	0.45	0.3328	3.6806	1.62	0	0	0.1	0.36	10.4	4.3161	96.9993	6.4162	1.5838	8	3.255	0.047	0.0348	0.4277	0	0.3355	4.1	0.0054	0	0.097	1.8434	1.9404	4	19.9773	0.439596	11Ca101a.
11Ca101a.	41	46.3399	29.9699	0.33	0.1462	3.7984	1.48	0.06	0.04	0.13	0.55	10.16	4.3341	97.3486	6.4115	1.5885	8	3.2986	0.0344	0.0152	0.4395	0.007	0.3053	4.1	0.007	0.0059	0.1475	1.7933	1.9468	4	19.9821	0.409909	11Ca101a.
11Ca101a.	43	45.92	29.4299	0.34	1.4999	2.7804	1.85	0.06	0	0.09	0.3999	10.26	4.3178	96.9779	6.3775	1.6225	8	3.1947	0.0355	0.1568	0.3229	0.0071	0.383	4.1	0.0049	0	0.1077	1.8178	1.9255	4	19.9726	0.54257	11Ca101a.
11Ca101a.	44	46.35	29.0101	0.2499	0.3159	3.6858	1.78	0.0099	0.05	0.07	0.26	10.5501	4.2973	96.6589	6.4679	1.5321	8	3.239	0.0262	0.0332	0.4301	0.0012	0.3703	4.1	0.0038	0.0075	0.0704	1.8781	1.956	4	19.9868	0.462644	11Ca101a.
11Ca101a.	45	45.4799	30.1199	0.34	1.7254	2.5474	1.7001	0.03	0.04	0.09	0.39	10.08	4.3227	96.9154	6.3092	1.6908	8	3.2337	0.0355	0.1801	0.2955	0.0035	0.3516	4.1	0.0049	0.0059	0.1049	1.7839	1.8948	4	19.9605	0.543347	11Ca101a.
The proportion of cations is based on 42 negative charges neglecting the interlayer cations; the sum of octahedrally coordinated cations is set at 4.1 to allow for an estimation of Fe3+
*value calculated

## Sheet: Chlorite
Chlorite
Birchy Complex
Spessartine
quartzite	lab#	SiO2	Al2O3	TiO2	FeO	MgO	MnO	CaO	Na2O	K2O	H2O*	SUM	Si	AlIV	sum	AlVI	Ti	Mn	Fe	Mg	sum	Na	K	Ca	OH	XMg
10Ca48.	79	24.5959	19.8639	<0.05	26.0027	13.0258	2.7142	<0.07	<0.05	<0.05	10.9545	97.2392	5.3856	2.6144	8	2.5118	0.0063	0.5034	4.7617	4.2519	12.0352	0	0.0017	0.0089	16	0.471721
10Ca48.	82	24.9361	20.2267	0.0501	26.2458	12.9727	2.762	0.0546	<0.05	<0.05	11.0889	98.3993	5.394	2.606	8	2.5505	0.0081	0.5061	4.748	4.1833	11.996	0.0136	0.0083	0.0126	16	0.468386
10Ca48.	83	25.1885	19.5786	0.0467	26.1287	13.1551	2.6122	0.021	<0.05	0.0602	11.0358	97.8553	5.4748	2.5252	8	2.4901	0.0076	0.481	4.7495	4.2625	11.9907	0.0119	0.0167	0.0049	16	0.47298
10Ca48.	84	25.319	19.7487	<0.05	26.1262	13.5481	2.7878	0	<0.05	0.0169	11.139	98.7241	5.4522	2.5478	8	2.4642	0.0062	0.5085	4.7051	4.3492	12.0333	0	0.0046	0	16	0.480346
10Ca48.	85	24.8398	20.3382	0.0501	26.1699	13.1634	2.6342	0	<0.05	0.0084	11.0908	98.3103	5.3722	2.6278	8	2.5563	0.0081	0.4826	4.7334	4.244	12.0245	0.0023	0.0023	0	16	0.472743
10Ca48.	99	24.705	19.6315	<0.05	26.5263	13.0075	2.9028	0.028	<0.05	0.0289	10.9868	97.8569	5.3936	2.6064	8	2.445	0.0055	0.5368	4.8433	4.2335	12.0641	0	0.0081	0.0065	16	0.466409
10Ca48.	100	24.014	19.556	<0.05	26.1802	12.2298	2.9493	0.0042	<0.05	0.053	10.7379	95.7894	5.3643	2.6357	8	2.5128	0.0062	0.5581	4.8909	4.0726	12.0406	0.0123	0.0151	0.001	16	0.454354
10Ca48.	101	25.6036	19.5295	0.045	25.9281	13.5829	2.3798	0.0028	<0.05	0.0048	11.1169	98.2102	5.5244	2.4756	8	2.4907	0.0073	0.435	4.6787	4.3691	11.9807	0.0056	0.0013	0.0006	16	0.482891
10Ca48.	103	25.2805	19.9414	0.0467	26.7488	12.7754	2.7427	0.0224	<0.05	0.0277	11.1106	98.7285	5.4578	2.5422	8	2.5317	0.0076	0.5016	4.8295	4.1116	11.9819	0.0135	0.0076	0.0052	16	0.459854
Mafic rock	lab#	SiO2	Al2O3	TiO2	FeO	MgO	MnO	CaO	Na2O	K2O	H2O*	SUM	Si	AlIV	sum	AlVI	Ti	Mn	Fe	Mg	sum	Na	K	Ca	OH	XMg
10Ca47.	45	24.75	19.8791	<0.05	27.6854	13.6824	0.399	0.0546	<0.05	<0.05	11.0243	97.5629	5.3851	2.6149	8	2.4827	0.0057	0.0735	5.0377	4.438	12.0378	0.0148	0.005	0.0127	16	0.468356
10Ca47.	46	25.1008	20.1889	<0.05	27.6056	13.9063	0.4326	0.0238	<0.05	0.0084	11.1518	98.4766	5.399	2.601	8	2.5169	0.0065	0.0788	4.9658	4.4591	12.0271	0.0011	0.0023	0.0055	16	0.473119
10Ca47.	47	25.2142	19.59	<0.05	27.9286	13.2463	0.4726	0.0532	<0.05	0	11.0198	97.5363	5.4883	2.5117	8	2.5139	0.0008	0.0871	5.0841	4.2983	11.9843	0.0028	0	0.0124	16	0.458124
10Ca47.	48	24.996	20.1606	<0.05	27.5825	13.5979	0.4326	0.0392	<0.05	0.0096	11.091	97.9678	5.4059	2.5941	8	2.5447	0.0073	0.0792	4.9888	4.3841	12.0042	0.0057	0.0027	0.0091	16	0.467742
10Ca47.	49	25.2228	19.8961	<0.05	26.9212	13.8317	0.3693	0.077	<0.05	0.0626	11.0748	97.5433	5.4629	2.5371	8	2.5417	0.0014	0.0678	4.8764	4.466	11.9531	0.0334	0.0173	0.0179	16	0.478036
16Ca107.		24.8933	20.0378	<0.05	27.3895	13.2447	0.5113	0.0294	0.1105	0.0096	11.0107	97.3019	5.423	2.577	8	2.5677	0.0068	0.0943	4.9901	4.3013	11.9603	0.0467	0.0027	0.0069	16	0.462933
16Ca107.		24.7414	20.2154	<0.05	26.4414	12.9445	0.5126	0.042	0.2736	0.0012	10.921	96.1822	5.4342	2.5658	8	2.6671	0	0.0954	4.8569	4.2384	11.8578	0.1165	0.0003	0.0099	16	0.465999
16Ca107.		25.2377	20.4062	0.0701	26.6794	13.7521	0.5178	0.0546	<0.05	0	11.1349	97.8662	5.4367	2.5633	8	2.6175	0.0114	0.0945	4.8065	4.4163	11.9461	0.0056	0	0.0126	16	0.478846
16Ca107.		24.8377	19.9792	<0.05	27.4487	13.2496	0.51	0.0616	0.1375	0.0145	11.0065	97.3554	5.4129	2.5871	8	2.5446	0.0027	0.0941	5.0028	4.3046	11.9489	0.0581	0.004	0.0144	16	0.462492
16Ca107.		25.3511	20.1568	0.0584	27.5966	13.238	0.4765	0.0882	<0.05	0.0157	11.1179	98.1284	5.4694	2.5306	8	2.5948	0.0095	0.0871	4.9793	4.2577	11.9284	0	0.0043	0.0204	16	0.46094
16Ca107.		25.1179	20.7218	0.0501	26.7334	13.3956	0.4932	0.0798	0.0687	0.0373	11.1302	97.8776	5.4132	2.5868	8	2.6764	0.0081	0.09	4.8183	4.3037	11.8965	0.0287	0.0103	0.0184	16	0.471793
16Ca107.		24.5467	19.8129	<0.05	26.9727	13.1932	0.4778	0.1399	0.0822	0.0108	10.8846	96.1718	5.4094	2.5906	8	2.5553	0.0055	0.0892	4.9711	4.3343	11.9554	0.0351	0.003	0.033	16	0.465783
16Ca107.		25.5886	20.204	0.0601	26.8994	13.9279	0.5346	0.1553	<0.05	0.0277	11.2286	98.8151	5.4663	2.5337	8	2.553	0.0097	0.0967	4.8057	4.4354	11.9005	0.0625	0.0076	0.0355	16	0.479965
16Ca107.		25.0473	19.6996	0.045	26.314	13.4138	0.5423	0.375	<0.05	0.0145	10.9574	96.4469	5.4831	2.5169	8	2.5655	0.0074	0.1006	4.8175	4.3775	11.8684	0	0.004	0.088	16	0.476074
16Ca107.		25.4153	19.7581	0.0634	26.3693	13.568	0.5397	0.2001	<0.05	0.0301	11.0449	97.0752	5.5196	2.4804	8	2.5768	0.0104	0.0993	4.7894	4.3927	11.8685	0	0.0083	0.0466	16	0.478398
16Ca107.		25.6378	20.1436	<0.05	27.3239	13.6924	0.5049	0.1301	<0.05	0.0398	11.2056	98.7306	5.488	2.512	8	2.5699	0	0.0915	4.8915	4.3694	11.9224	0	0.0109	0.0298	16	0.471812
16Ca107.		25.5094	20.0699	0.0467	26.6009	13.6576	0.4829	0.2812	0.1779	0.0626	11.147	98.0537	5.4893	2.5107	8	2.5792	0.0076	0.088	4.7872	4.3812	11.8432	0.0742	0.0172	0.0648	16	0.477859
16Ca107.		25.8496	19.7487	0.0501	25.6077	13.7504	0.5281	0.3988	0.0876	0.041	11.1013	97.1633	5.5853	2.4147	8	2.6144	0.0081	0.0967	4.6274	4.4291	11.7757	0.0367	0.0113	0.0923	16	0.489052
16Ca107.		25.6956	20.1984	<0.05	26.031	13.83	0.4468	0.3414	<0.05	0	11.1689	97.832	5.5184	2.4816	8	2.6309	0.0035	0.0813	4.6754	4.4278	11.8189	0.0056	0	0.0786	16	0.4864
16Ca107.		25.1843	20.308	<0.05	26.8029	13.6509	0.43	0.1847	<0.05	0.0096	11.1106	97.7554	5.437	2.563	8	2.6042	0.0046	0.0786	4.8393	4.3934	11.9201	0.0107	0.0027	0.0427	16	0.475852
16Ca107.		24.7842	20.0359	<0.05	26.377	13.6543	0.5152	0.1133	0.1173	0.0554	10.9782	96.6575	5.4152	2.5848	8	2.5746	0.0044	0.0953	4.8198	4.4475	11.9416	0.0497	0.0154	0.0265	16	0.479913
16Ca107.		25.7405	19.624	<0.05	26.103	13.7239	0.4894	0.3666	<0.05	0.0301	11.0796	97.1937	5.5727	2.4273	8	2.5798	0.0003	0.0897	4.7261	4.4293	11.8253	0	0.0083	0.085	16	0.483791
16Ca107.		25.2399	19.8394	<0.05	26.112	13.5581	0.4171	0.1693	0.2345	0.0687	11.0088	96.7252	5.4994	2.5006	8	2.594	0.0038	0.077	4.7581	4.4039	11.8369	0.0991	0.0191	0.0395	16	0.48067
16Ca107.		25.2762	19.8942	0.0551	26.8492	13.84	0.5436	0.1791	<0.05	0.0385	11.0997	97.7756	5.4622	2.5378	8	2.5291	0.009	0.0995	4.8524	4.4586	11.9486	0	0.0106	0.0415	16	0.478853
16Ca107.		25.794	18.9419	0.1168	26.3963	13.4569	0.5036	0.8689	0.1065	0.094	11.0524	97.4233	5.598	2.402	8	2.4429	0.0191	0.0926	4.791	4.3538	11.6993	0.0448	0.026	0.202	16	0.476096
16Ca107.		25.933	20.1379	0.0317	26.5314	13.6028	0.4442	0.2658	<0.05	0.0253	11.1937	98.1718	5.5571	2.4429	8	2.643	0.0051	0.0806	4.7547	4.3454	11.8289	0	0.0069	0.061	16	0.477511
Metapelite	lab#	SiO2	Al2O3	TiO2	FeO	MgO	MnO	CaO	Na2O	K2O	H2O*	SUM	Si	AlIV	sum	AlVI	Ti	Mn	Fe	Mg	sum	Na	K	Ca	OH	XMg
10Ca49.	33	26.823	20.7936	0.1301	20.7126	17.6623	0.4171	0.0588	<0.05	0.0566	11.5398	98.1938	5.5754	2.4246	8	2.6693	0.0204	0.0734	3.6006	5.473	11.8367	0	0.015	0.0131	16	0.603178
10Ca49.	34	26.8465	20.2626	0.0884	20.0758	17.5131	0.3977	0.084	<0.05	0.0988	11.3966	96.7634	5.6504	2.3496	8	2.6767	0.014	0.0709	3.5337	5.4949	11.7903	0	0.0265	0.0189	16	0.60861
10Ca49.	35	26.8551	21.3812	0.1435	21.0831	17.392	0.4352	0.035	<0.05	0.0265	11.6262	98.9858	5.5406	2.4594	8	2.7396	0.0223	0.0761	3.6377	5.3492	11.8248	0.0032	0.007	0.0077	16	0.595222
10Ca49.	36	26.0678	19.7298	0.0634	20.6457	17.0222	0.4067	0.0574	<0.05	0.0385	11.1523	95.1839	5.6067	2.3933	8	2.608	0.0103	0.0741	3.7136	5.4579	11.8639	0	0.0106	0.0132	16	0.595093
10Ca49.	37	26.6561	21.1677	0.1185	20.4347	17.8149	0.3525	0.0322	<0.05	0.0458	11.5601	98.2053	5.531	2.469	8	2.7074	0.0185	0.062	3.546	5.5106	11.8445	0.0092	0.0121	0.0072	16	0.608462
10Ca49.	38	27.0391	20.4024	<0.05	21.0741	17.5247	0.4687	0.014	<0.05	0.0398	11.5104	98.1219	5.6347	2.3653	8	2.6456	0.0008	0.0827	3.6728	5.4442	11.8461	0.0033	0.0106	0.0031	16	0.597148
10Ca49.	39	26.1876	21.2791	<0.05	20.867	17.9309	0.3628	0	<0.05	0.0928	11.5302	98.2856	5.4478	2.5522	8	2.6651	0.0055	0.0639	3.6304	5.5608	11.9258	0	0.0246	0	16	0.605013
10Ca49.	40	26.8251	20.5215	<0.05	21.5462	17.203	0.3835	0.0238	<0.05	0.0578	11.4818	98.0744	5.604	2.396	8	2.6567	0.005	0.0679	3.7644	5.3576	11.8516	0	0.0154	0.0053	16	0.587327
11Ca105.	69	24.6494	19.1818	<0.05	31.9308	9.8369	0.4042	0	<0.05	0.0446	10.7071	96.7799	5.5221	2.4779	8	2.5866	0.0042	0.0767	5.9824	3.2852	11.9351	0	0.0127	0	16	0.354482
11Ca105.	70	24.5553	19.1119	<0.05	32.5535	9.8369	0.3616	0	<0.05	0	10.7195	97.1637	5.4946	2.5054	8	2.5349	0.0042	0.0685	6.092	3.2814	11.981	0	0	0	16	0.350076
11Ca105.	71	24.9361	18.8663	<0.05	32.4815	9.6296	0.4597	0.0322	<0.05	0.0229	10.7281	97.1969	5.5754	2.4246	8	2.5469	0.0048	0.0871	6.0736	3.2097	11.9221	0	0.0065	0.0077	16	0.34575
11Ca105.	72	21.8875	19.3595	0.0884	25.0185	15.2561	0.3745	0.0042	<0.05	0.0145	10.4635	92.4787	5.0175	2.9825	8	2.248	0.0153	0.0727	4.7965	5.2137	12.3462	0.0054	0.0042	0.001	16	0.520839
11Ca105.	73	21.588	19.4483	0.0634	24.9812	15.8432	0.4222	0.007	<0.05	0.0108	10.4976	92.874	4.9328	3.0672	8	2.1702	0.0109	0.0817	4.7737	5.3967	12.4332	0	0.0032	0.0017	16	0.530628
11Ca105.	74	21.8341	19.6655	<0.05	24.5747	15.1882	0.3628	0.0154	<0.05	0.0145	10.4555	92.1831	5.0091	2.9909	8	2.3263	0.0075	0.0705	4.715	5.1944	12.3136	0.009	0.0042	0.0038	16	0.524189
11Ca105.	75	21.6009	18.7265	<0.05	25.1098	15.5779	0.3719	0	<0.05	0.0373	10.3573	91.8066	5.0026	2.9974	8	2.1139	0.0032	0.073	4.8633	5.3782	12.4316	0.003	0.011	0	16	0.525138
11Ca105.	76	21.3934	19.3802	<0.05	24.8294	15.2694	0.3499	0.0042	<0.05	0.0349	10.3613	91.6639	4.9526	3.0474	8	2.2404	0.0052	0.0686	4.8072	5.2697	12.3911	0	0.0103	0.001	16	0.522949
11Ca105.	81	21.787	19.3009	<0.05	24.4679	15.1898	0.4003	0.0168	<0.05	0.0506	10.3892	91.6788	5.0302	2.9698	8	2.2821	0.0032	0.0783	4.7244	5.2281	12.3161	0.0259	0.0149	0.0042	16	0.525305
11Ca105.	86	22.0715	18.8946	<0.05	24.6158	14.7487	0.3913	0.0182	0.0485	0.041	10.3321	91.2152	5.124	2.876	8	2.2938	0.007	0.0769	4.7793	5.1044	12.2614	0.0218	0.0121	0.0045	16	0.516446
11Ca105.	87	21.6929	19.2895	<0.05	24.4769	15.4701	0.2983	0	<0.05	0.0879	10.3984	91.7575	5.004	2.996	8	2.2482	0.0041	0.0583	4.722	5.3199	12.3524	0.009	0.0259	0	16	0.52977
16Ca106.	95	24.5852	19.3991	<0.05	31.3506	10.7954	0.3796	0.0238	<0.05	0.0385	10.8117	97.4224	5.4544	2.5456	8	2.5268	0.0064	0.0713	5.8169	3.5704	11.9919	0	0.0109	0.0057	16	0.380344
16Ca106.	97	24.3456	19.7128	<0.05	32.3876	10.4289	0.4235	0	<0.05	0.0036	10.8455	98.1965	5.3844	2.6156	8	2.5227	0.0072	0.0793	5.9905	3.4385	12.0382	0	0.001	0	16	0.364673
16Ca106.	98	24.2943	19.9603	<0.05	31.4407	10.467	0.4558	0.0322	<0.05	0	10.816	97.508	5.3877	2.6123	8	2.6048	0.007	0.0856	5.8313	3.4605	11.9891	0	0	0.0076	16	0.372425
16Ca106.	99	24.6195	19.1686	<0.05	31.3532	10.7208	0.3512	0.0112	<0.05	0.0337	10.7706	97.0828	5.4828	2.5172	8	2.514	0.0048	0.0663	5.8395	3.5593	11.9838	0.0111	0.0096	0.0027	16	0.378697
16Ca106.	100	24.7414	19.4558	<0.05	32.3837	10.7357	0.4145	0.007	<0.05	0.0819	10.9144	98.7555	5.4374	2.5626	8	2.4767	0.003	0.0772	5.952	3.5173	12.0262	0.0011	0.023	0.0016	16	0.371442
16Ca106.	103	23.9926	19.6618	<0.05	31.9785	10.4488	0.368	0.0098	<0.05	0.0747	10.7519	97.3529	5.3525	2.6475	8	2.5222	0.0031	0.0695	5.9663	3.475	12.0361	0.021	0.0213	0.0023	16	0.368064
16Ca106.	104	24.2023	20.1322	<0.05	32.3438	10.6097	0.4468	0.021	<0.05	0.0036	10.9104	98.7448	5.3209	2.6791	8	2.5374	0.0066	0.0832	5.9469	3.4773	12.0513	0.0149	0.001	0.0049	16	0.368976
16Ca106.	120	24.106	20.3873	<0.05	31.5938	10.7241	0.43	0	<0.05	0.0253	10.8913	98.2434	5.309	2.691	8	2.6008	0.005	0.0802	5.8191	3.5209	12.0261	0.019	0.0071	0	16	0.37697
16Ca70.	42	23.7873	20.7236	0.1235	29.7927	11.5947	0.4016	0.007	<0.05	0	10.875	97.3053	5.2467	2.7533	8	2.6339	0.0205	0.075	5.4957	3.8125	12.0376	0	0	0.0017	16	0.409585
16Ca70.	43	23.8258	21.094	0.0667	30.4179	11.865	0.4571	0.0168	<0.05	0.0084	11.0153	98.7708	5.1882	2.8118	8	2.6019	0.0109	0.0843	5.5395	3.8517	12.0883	0.0011	0.0023	0.0039	16	0.410139
16Ca70.	46	23.9114	20.922	<0.05	29.9278	11.5035	0.4403	0.021	<0.05	0	10.9181	97.6874	5.2532	2.7468	8	2.6705	0.0072	0.0819	5.4988	3.7676	12.026	0	0	0.0049	16	0.406587
16Ca70.	47	23.8557	21.2791	<0.05	30.8682	11.0624	0.4222	0	<0.05	0	10.9701	98.5002	5.2162	2.7838	8	2.6998	0.0063	0.0782	5.6447	3.6059	12.0349	0.0017	0	0	16	0.389802
16Ca70.	48	24.1424	21.1091	<0.05	29.3617	12.2265	0.4132	0	<0.05	0	11.0328	98.3207	5.2489	2.7511	8	2.6578	0.0057	0.0761	5.3387	3.9627	12.041	0	0	0	16	0.426033
16Ca70.	76	23.875	21.111	0.0484	29.4814	11.9578	0.3551	0.0056	<0.05	0.0024	10.9605	97.8065	5.225	2.775	8	2.6701	0.008	0.0658	5.3958	3.9012	12.0409	0.004	0.0007	0.0013	16	0.419619
16Ca70.	77	23.5455	21.3415	0.0534	29.0928	11.7738	0.4571	0.0112	<0.05	0.0506	10.8983	97.232	5.1823	2.8177	8	2.7182	0.0088	0.0852	5.3551	3.8631	12.0305	0	0.0142	0.0026	16	0.419073
16Ca70.	78	23.5284	21.2697	0.0834	31.6337	10.5748	0.4752	0.1399	<0.05	0	10.9274	98.6325	5.1647	2.8353	8	2.6674	0.0138	0.0884	5.8073	3.4605	12.0373	0	0	0.0329	16	0.37339
16Ca70.	79	23.7809	21.3132	<0.05	29.8737	11.9015	0.3887	0.0266	<0.05	0	10.998	98.3297	5.1866	2.8134	8	2.6651	0.0036	0.0718	5.449	3.8696	12.059	0.0108	0	0.0062	16	0.415256
16Ca71.	31	23.8857	21.4983	<0.05	28.7455	11.1685	0.3551	0.014	<0.05	0.012	10.87	96.6269	5.2708	2.7292	8	2.8619	0.0066	0.0664	5.3049	3.674	11.9139	0.0161	0.0034	0.0033	16	0.409182
16Ca71.	45	22.4737	21.5966	0.0717	28.2347	11.8219	0.4235	0	<0.05	0	10.6999	95.382	5.0381	2.9619	8	2.7441	0.0121	0.0804	5.2935	3.9508	12.0809	0	0	0	16	0.427377
16Ca71.	46	22.7754	21.6325	<0.05	29.2807	11.1187	0.4623	0	<0.05	0.0072	10.7358	96.0666	5.0886	2.9114	8	2.785	0.002	0.0875	5.4712	3.7034	12.049	0	0.0021	0	16	0.403658
16Ca71.	47	23.1305	21.7912	0.0901	28.6992	11.7423	0.4261	0	0.2831	0.0157	10.8858	97.0639	5.0968	2.9032	8	2.7558	0.0149	0.0795	5.2887	3.8572	11.9961	0.1209	0.0044	0	16	0.421741
16Ca71.	48	22.8032	20.9863	<0.05	31.1384	10.2498	0.4506	0.0084	<0.05	0	10.665	96.3645	5.1287	2.8713	8	2.6916	0	0.0858	5.857	3.4366	12.0711	0	0	0.002	16	0.369781
16Ca71.	50	23.1476	21.5361	0.0634	28.9822	11.5482	0.43	0	0.1806	0.0048	10.8347	96.7408	5.1246	2.8754	8	2.7438	0.0106	0.0806	5.366	3.8113	12.0124	0.0775	0.0014	0	16	0.415296
16Ca71.	56	23.6011	21.2886	0.0567	29.5688	10.5301	0.4842	0.0112	<0.05	0.0072	10.7748	96.3228	5.254	2.746	8	2.8395	0.0095	0.0913	5.5051	3.4946	11.94	0	0.0021	0.0027	16	0.388302
16Ca71.	57	23.3487	21.5172	0.0934	29.08	10.8335	0.4661	0.028	<0.05	0.0133	10.7777	96.1845	5.1965	2.8035	8	2.8405	0.0156	0.0879	5.4126	3.5944	11.951	0.0058	0.0038	0.0067	16	0.399067
16Ca71.	58	23.4963	21.7005	0.0717	29.4299	11.1735	0.4442	0.0056	<0.05	0.0301	10.8953	97.2898	5.1729	2.8271	8	2.8035	0.0119	0.0828	5.4186	3.6671	11.9839	0.0058	0.0085	0.0013	16	0.403612
16Ca71.	70	22.5679	21.3812	<0.05	29.1507	10.8551	0.4067	0.4394	<0.05	0.0205	10.6675	95.6718	5.0746	2.9254	8	2.7408	0.0068	0.0775	5.4818	3.6387	11.9456	0.0623	0.0059	0.1059	16	0.398958
16Ca72.	22	23.8258	21.06	0.0584	30.5401	11.4189	0.3125	0.0014	<0.05	0.0771	10.9549	98.2796	5.2169	2.7831	8	2.6516	0.0096	0.058	5.5924	3.7273	12.0389	0.012	0.0215	0.0003	16	0.399938
16Ca72.	25	25.1351	22.3165	<0.05	30.5955	9.9082	0.3861	0.0322	0.0809	0.5071	11.2139	100.214	5.3764	2.6236	8	3.0023	0.0062	0.07	5.4732	3.1595	11.7111	0.0335	0.1384	0.0074	16	0.365992
16Ca72.	26	23.6824	21.6929	0.0818	31.4188	11.1088	0.4377	0.0084	<0.05	0.0036	11.0558	99.4903	5.1381	2.8619	8	2.6851	0.0133	0.0804	5.7008	3.593	12.0726	0	0.001	0.002	16	0.386602
16Ca72.	27	24.0889	21.5531	0.0517	31.1898	11.5416	0.3603	0	<0.05	0.0133	11.1334	99.9321	5.1899	2.8101	8	2.6627	0.0084	0.0657	5.6198	3.7069	12.0635	0	0.0036	0	16	0.39745
16Ca72.	28	23.9349	21.5985	0.0467	31.1126	11.2216	0.3835	0.0168	<0.05	0	11.0698	99.3897	5.1863	2.8137	8	2.7021	0.0076	0.0704	5.6381	3.6249	12.0431	0.0023	0	0.0039	16	0.391331
16Ca72.	29	23.5905	21.2716	0.0517	31.8524	10.7655	0.3525	0.0322	<0.05	0.012	10.9566	98.8918	5.1645	2.8355	8	2.6529	0.0085	0.0654	5.8318	3.5135	12.0721	0.0029	0.0034	0.0075	16	0.375964
16Ca72.	30	23.6118	21.7251	<0.05	31.397	10.8236	0.3835	0	<0.05	0.0157	11.0014	99.0055	5.1482	2.8518	8	2.7308	0.0049	0.0708	5.7251	3.5181	12.0497	0.0074	0.0044	0	16	0.380615
16Ca72.	31	23.8129	21.3925	0.0634	31.1988	11.0491	0.359	0.0098	<0.05	0.0108	11.0018	98.8981	5.1918	2.8082	8	2.6888	0.0104	0.0663	5.6887	3.5912	12.0455	0	0.003	0.0023	16	0.386987
16Ca72.	32	23.8322	20.9957	0.0601	32.6796	10.6179	0.3938	0.0196	<0.05	0	10.9991	99.6061	5.1973	2.8027	8	2.5937	0.0099	0.0728	5.9602	3.4519	12.0884	0.0034	0	0.0046	16	0.366751
16Ca72.	33	23.676	21.4133	0.0717	31.3352	11.4239	0.3357	0.0294	<0.05	0.0349	11.0435	99.3866	5.1425	2.8575	8	2.624	0.0117	0.0618	5.692	3.699	12.0885	0.0097	0.0097	0.0068	16	0.393888
16Ca72.	34	23.6653	21.1053	0.0584	32.4519	10.3161	0.408	0.028	<0.05	0.0205	10.935	98.998	5.1911	2.8089	8	2.6474	0.0096	0.0758	5.9533	3.3735	12.0597	0.004	0.0057	0.0066	16	0.3617
16Ca72.	35	23.5199	20.8729	<0.05	31.7096	10.6959	0.4274	0.0308	<0.05	0	10.8676	98.1641	5.1912	2.8088	8	2.6209	0.0066	0.0799	5.8532	3.5193	12.08	0	0	0.0073	16	0.375492
16Ca74.	2	23.0107	20.9882	<0.05	31.0599	10.3709	0.4481	0.0336	<0.05	0	10.7107	96.6553	5.1533	2.8467	8	2.6929	0.0056	0.085	5.8173	3.4624	12.0632	0	0	0.0081	16	0.373116
16Ca74.	3	23.3252	20.9126	0.0601	30.1053	11.6643	0.39	0.021	<0.05	0.0084	10.8497	97.3513	5.1568	2.8432	8	2.6058	0.01	0.073	5.5663	3.8443	12.0994	0.0064	0.0024	0.005	16	0.408507
16Ca74.	4	23.1241	20.9504	<0.05	30.0538	11.0657	0.3603	0.0252	<0.05	0	10.7337	96.3448	5.1676	2.8324	8	2.6854	0.0053	0.0682	5.6168	3.6864	12.0622	0	0	0.006	16	0.396251
16Ca74.	6	23.4792	20.8786	0.0551	29.884	11.6527	0.3422	0.0322	<0.05	0.0036	10.849	97.1765	5.1912	2.8088	8	2.6316	0.0092	0.0641	5.5257	3.8407	12.0713	0	0.001	0.0076	16	0.410051
16Ca74.	16	22.8802	21.3302	<0.05	29.9574	11.2265	0.3318	0	<0.05	0.0048	10.7594	96.5253	5.1009	2.8991	8	2.7053	0.0059	0.0627	5.5854	3.7311	12.0904	0	0.0014	0	16	0.400483
16Ca74.	22	23.4428	22.222	0.0601	29.5778	11.787	0.2996	0.0056	<0.05	0.0024	11.0377	98.4499	5.0945	2.9055	8	2.786	0.0098	0.0551	5.3756	3.8186	12.0452	0.0062	0.0007	0.0013	16	0.415327
16Ca74.	25	23.4664	20.4232	0.0534	30.7215	11.2232	0.461	0.0923	<0.05	0.0253	10.7986	97.2703	5.2126	2.7874	8	2.5592	0.0089	0.0867	5.7071	3.7165	12.0785	0.0023	0.0072	0.022	16	0.394382
16Ca74.	26	22.9679	20.0491	<0.05	32.3271	10.5433	0.4145	0.0518	<0.05	0.0337	10.6755	97.0995	5.1607	2.8393	8	2.4699	0.0062	0.0789	6.0746	3.5316	12.1612	0	0.0097	0.0125	16	0.367638
16Ca74.	27	22.9208	20.0699	0.0501	31.9823	10.545	0.5036	0.0294	<0.05	0.0193	10.6514	96.7717	5.1617	2.8383	8	2.4885	0.0085	0.0961	6.0234	3.5401	12.1566	0	0.0055	0.0071	16	0.370168
16Ca74.	43	22.8588	20.2891	<0.05	30.7151	11.3575	0.377	0.0042	<0.05	0	10.6742	96.3284	5.1367	2.8633	8	2.5102	0.0071	0.0718	5.7724	3.8048	12.1661	0.0047	0	0.001	16	0.397277
16Ca74.	44	22.7796	19.6504	0.045	31.6967	10.5102	0.3925	0.0056	<0.05	0.0301	10.5297	95.6696	5.1892	2.8108	8	2.465	0.0077	0.0757	6.0386	3.5692	12.1563	0.0018	0.0088	0.0014	16	0.37149
16Ca74.	45	23.1818	20.0434	<0.05	31.011	11.2381	0.3551	0.021	<0.05	0.0193	10.6978	96.6042	5.1979	2.8021	8	2.4946	0.0062	0.0674	5.8152	3.7565	12.1398	0	0.0055	0.005	16	0.392459
BVOT and cover units
Mafic rock	lab#	SiO2	Al2O3	TiO2	FeO	MgO	MnO	CaO	Na2O	K2O	H2O*	SUM	Si	AlIV	sum	AlVI	Ti	Mn	Fe	Mg	sum	Na	K	Ca	OH	XMg
10Ca68.	23	28.4382	20.0132	<0.05	18.4651	21.8246	0.1911	0.1091	<0.05	<0.05	12.0406	101.137	5.6653	2.3347	8	2.3641	0	0.0322	3.0764	6.4815	11.9543	0.0115	0	0.0233	16	0.67813
10Ca68.	24	28.1323	20.2494	<0.05	18.6684	21.9606	0.1898	<0.07	<0.05	<0.05	12.0456	101.282	5.602	2.398	8	2.3544	0	0.032	3.109	6.5192	12.0145	0.0068	0	0.0039	16	0.677094
10Ca68.	25	28.2093	20.1587	<0.05	18.2734	21.803	0.1537	<0.07	<0.05	<0.05	12.0008	100.705	5.6383	2.3617	8	2.387	0.0023	0.026	3.0545	6.4965	11.9663	0.0136	0	0.012	16	0.680191
10Ca68.	26	28.0531	20.1039	<0.05	18.622	21.5062	0.2131	<0.07	<0.05	<0.05	11.9549	100.554	5.6287	2.3713	8	2.3827	0	0.0362	3.1248	6.4327	11.9764	0.0047	0.0102	0.0105	16	0.673053
10Ca68.	28	28.1964	20.3325	<0.05	18.2207	21.6339	0.1756	0.2057	<0.05	<0.05	12.0133	100.818	5.6299	2.3701	8	2.4146	0	0.0297	3.0426	6.4395	11.9263	0.0146	0	0.044	16	0.679122
10Ca68.	29	28.7548	19.248	<0.05	18.1319	22.4846	0.2286	0.1077	<0.05	<0.05	12.0423	101.045	5.7275	2.2725	8	2.2461	0	0.0386	3.0204	6.6765	11.9816	0.0156	0.0012	0.023	16	0.688519
10Ca73.	4	26.0742	19.0987	0.045	23.1248	17.4401	0.2815	0.1371	<0.05	<0.05	11.2832	97.4926	5.543	2.457	8	2.3282	0.0072	0.0507	4.1113	5.527	12.0244	0.0028	0.0003	0.0312	16	0.573441
10Ca73.	5	26.0828	19.059	<0.05	23.2444	18.2825	0.2841	0.0742	<0.05	0.0928	11.3914	98.5503	5.4922	2.5078	8	2.222	0.0021	0.0507	4.0933	5.739	12.107	0.0083	0.0249	0.0167	16	0.583688
10Ca73.	17	26.7609	20.2626	0.0701	23.7346	16.6358	0.2221	0.1021	<0.05	0.1132	11.5207	99.4384	5.5717	2.4283	8	2.5438	0.011	0.0392	4.1327	5.1635	11.8902	0.0065	0.0301	0.0228	16	0.555442
10Ca73.	40	27.929	18.3335	<0.05	22.7414	17.6225	0.2453	0.771	0.0512	<0.05	11.5345	99.2301	5.808	2.192	8	2.3013	0.0003	0.0432	3.9551	5.4632	11.763	0.0207	0	0.1718	16	0.580062
10Ca75.	1	26.9385	18.0142	<0.05	25.1716	16.1334	0.532	0.2015	<0.05	<0.05	11.2653	98.2669	5.7359	2.2641	8	2.2565	0	0.096	4.4823	5.1211	11.9559	0.0033	0.0007	0.046	16	0.533259
10Ca75.	5	26.179	19.5295	<0.05	25.4135	15.1633	0.5204	<0.07	<0.05	<0.05	11.2464	98.1554	5.5835	2.4165	8	2.4926	0.0024	0.094	4.533	4.8212	11.9432	0	0.001	0.0137	16	0.515405
10Ca75.	7	26.5598	18.5111	<0.05	24.8358	15.9427	0.532	0.1091	<0.05	<0.05	11.2216	97.7585	5.6773	2.3227	8	2.3406	0.0024	0.0963	4.4398	5.0802	11.9594	0	0.0085	0.025	16	0.533634
10Ca75.	16	26.1085	19.008	<0.05	25.4019	15.5016	0.5979	<0.07	<0.05	<0.05	11.2059	97.9572	5.5886	2.4114	8	2.3838	0.0021	0.1084	4.5473	4.9466	11.9882	0.0168	0.0095	0.0103	16	0.521029
10Ca75.	22	27.2402	17.9046	<0.05	24.5142	16.6839	0.4816	<0.07	<0.05	<0.05	11.3145	98.298	5.7749	2.2251	8	2.2484	0.004	0.0865	4.3463	5.2728	11.958	0.0155	0.0098	0.0137	16	0.548159
10Ca75.	27	26.1448	19.3972	<0.05	26.0811	15.4966	0.5901	0.1119	<0.05	<0.05	11.3189	99.1593	5.5405	2.4595	8	2.3851	0.0003	0.1059	4.6223	4.8956	12.0092	0	0.0046	0.0254	16	0.514357
10Ca75.	32	26.0657	18.838	<0.05	24.877	16.004	0.5204	0.077	<0.05	<0.05	11.1924	97.6117	5.5861	2.4139	8	2.3442	0.0005	0.0945	4.4587	5.1131	12.011	0.0056	0.0056	0.0177	16	0.534184
10Ca75.	65	25.9865	19.1913	<0.05	25.2514	15.5845	0.492	0.0909	<0.05	<0.05	11.2086	97.897	5.5612	2.4388	8	2.4015	0.0027	0.0892	4.5193	4.9719	11.9845	0.0078	0.0102	0.0209	16	0.523843
10Ca75.	69	25.7405	19.3821	<0.05	25.2488	15.4618	0.6108	0.0895	<0.05	<0.05	11.1854	97.7737	5.5199	2.4801	8	2.4185	0.0016	0.1109	4.5282	4.9429	12.0022	0.0039	0.0073	0.0206	16	0.521893
10Ca75.	70	25.8132	19.4218	<0.05	24.7368	15.3606	0.5888	<0.07	<0.05	<0.05	11.1503	97.2057	5.5529	2.4471	8	2.477	0.0022	0.1073	4.4503	4.926	11.9628	0.0011	0.0102	0.0119	16	0.525367
10Ca75.	71	25.9951	19.5408	<0.05	25.3183	15.4104	0.5707	0.0616	<0.05	<0.05	11.2492	98.222	5.5429	2.4571	8	2.4536	0.0056	0.1031	4.5149	4.8985	11.9758	0.0045	0.0082	0.0141	16	0.520375
10Ca75.	72	25.9459	19.7014	<0.05	25.573	15.2396	0.6095	<0.07	<0.05	<0.05	11.261	98.4343	5.5266	2.4734	8	2.4725	0.0013	0.11	4.5556	4.8392	11.9786	0.0145	0.0016	0.0125	16	0.515093
10Ca75.	73	26.0849	19.6353	<0.05	25.6502	15.2512	0.5565	0.0658	<0.05	<0.05	11.279	98.5703	5.5474	2.4526	8	2.4688	0.0013	0.1003	4.562	4.8351	11.9675	0.0161	0	0.015	16	0.514531
10Ca75.	74	26.1234	19.384	<0.05	25.2359	15.0621	0.501	0.1525	<0.05	<0.05	11.2015	97.7539	5.594	2.406	8	2.486	0.0038	0.0909	4.5194	4.8082	11.9083	0.0196	0.0063	0.035	16	0.515481
10Ca75.	75	26.3117	19.1705	<0.05	25.2333	15.3954	0.6069	0.1567	<0.05	<0.05	11.2501	98.1986	5.61	2.39	8	2.4272	0.0032	0.1096	4.4994	4.8934	11.9329	0.0128	0.0062	0.0358	16	0.520974
10Ca75.	137	26.4336	18.9967	<0.05	26.0413	15.7768	0.6121	0.1021	<0.05	<0.05	11.3565	99.4747	5.5832	2.4168	8	2.312	0.0159	0.1095	4.6	4.9677	12.0051	0.0066	0.0091	0.0231	16	0.519216
10Ca75.	138	25.717	19.059	<0.05	26.0696	15.6475	0.5139	0.0784	<0.05	<0.05	11.208	98.3635	5.5038	2.4962	8	2.311	0.0011	0.0932	4.666	4.9922	12.0635	0.0084	0.0118	0.018	16	0.516887
10Ca75.	139	26.2946	19.197	<0.05	25.7968	15.805	0.6237	<0.07	<0.05	<0.05	11.3314	99.1197	5.5661	2.4339	8	2.3554	0.0027	0.1118	4.5669	4.9875	12.0243	0	0	0.0124	16	0.522011
10Ca75.	145	25.9373	17.812	<0.05	25.2861	16.2992	0.5927	<0.07	<0.05	<0.05	11.0864	97.1151	5.6118	2.3882	8	2.1538	0.0043	0.1086	4.5754	5.2572	12.0993	0	0.011	0.0081	16	0.53467
10Ca75.	146	25.6421	18.5526	<0.05	25.7235	15.7603	0.6069	<0.07	<0.05	<0.05	11.1093	97.469	5.5365	2.4635	8	2.2576	0	0.111	4.6449	5.0729	12.0864	0.013	0	0.01	16	0.522021
10Ca75.	147	25.8817	18.4563	<0.05	25.061	15.7321	0.6314	<0.07	<0.05	<0.05	11.087	96.9293	5.5995	2.4005	8	2.3055	0.0022	0.1157	4.5344	5.074	12.0318	0.0068	0.0047	0.0078	16	0.52808
10Ca79.	5	27.6595	20.0302	<0.05	18.0264	21.9788	0.257	0.1035	<0.05	<0.05	11.9013	99.9789	5.5747	2.4253	8	2.3326	0.0023	0.0439	3.0384	6.6037	12.0208	0	0.0019	0.0224	16	0.684882
10Ca79.	13	26.485	19.726	<0.05	17.9312	20.8976	0.2208	0.0798	<0.05	<0.05	11.5041	96.8763	5.5222	2.4778	8	2.3696	0	0.039	3.1267	6.4956	12.0309	0.0065	0.0042	0.0178	16	0.675057
10Ca79.	15	27.2188	20.1511	<0.05	18.0907	21.2641	0.275	0.0798	<0.05	<0.05	11.7637	98.9365	5.55	2.45	8	2.3926	0.0077	0.0475	3.085	6.4637	11.9965	0.0123	0	0.0174	16	0.676919
10Ca79.	21	27.0284	19.4161	<0.05	17.4102	21.0004	0.2324	0.0854	<0.05	<0.05	11.5299	96.7601	5.6229	2.3771	8	2.3835	0.001	0.041	3.0291	6.513	11.9676	0.0141	0.0042	0.019	16	0.682554
10Ca79.	28	27.5332	20.0189	<0.05	17.9492	21.6189	0.2492	<0.07	<0.05	<0.05	11.8209	99.2608	5.5869	2.4131	8	2.3745	0.0023	0.0428	3.046	6.5397	12.0053	0.0042	0.0003	0.0094	16	0.682235
10Ca79.	43	27.2936	20.291	<0.05	18.1267	21.7732	0.2867	<0.07	<0.05	<0.05	11.8526	99.6587	5.5235	2.4765	8	2.3632	0	0.0491	3.0679	6.5688	12.0491	0	0	0.0076	16	0.681644
10Ca79.	44	26.547	21.3831	<0.05	17.9608	20.6024	0.2595	0.0672	<0.05	<0.05	11.7303	98.5552	5.4285	2.5715	8	2.5818	0.0008	0.045	3.0715	6.2804	11.9794	0	0	0.0147	16	0.671564
10Ca79.	48	26.8102	20.9938	<0.05	17.7318	21.3868	0.2273	<0.07	<0.05	<0.05	11.7977	99.0175	5.4509	2.5491	8	2.4815	0.002	0.0391	3.015	6.4822	12.0199	0.008	0	0.0079	16	0.682538
10Ca80.	1	26.823	20.6273	<0.05	18.869	21.1994	0.5578	<0.07	<0.05	<0.05	11.8294	100.064	5.4389	2.5611	8	2.3684	0	0.0958	3.1998	6.4082	12.0722	0.0159	0.0274	0.0024	16	0.666965
10Ca80.	2	27.0712	20.427	<0.05	18.2348	20.9988	0.7399	<0.07	<0.05	<0.05	11.7852	99.3808	5.5098	2.4902	8	2.4098	0.0038	0.1276	3.1039	6.3714	12.0165	0.016	0.0025	0.0107	16	0.672422
10Ca80.	3	27.0754	20.2097	<0.05	18.3171	20.9158	0.6288	<0.07	<0.05	<0.05	11.7373	99.0012	5.5332	2.4668	8	2.4008	0.0018	0.1089	3.1306	6.3721	12.0141	0.0208	0.0097	0.0009	16	0.670557
10Ca80.	4	27.0797	20.1058	<0.05	18.6053	21.3089	0.6611	<0.07	<0.05	<0.05	11.7948	99.6463	5.5071	2.4929	8	2.3261	0.0026	0.1139	3.1643	6.4602	12.0671	0.0181	0.0041	0.0027	16	0.671224
10Ca80.	5	27.2744	20.1965	<0.05	18.3776	20.9092	0.6198	<0.07	<0.05	<0.05	11.7736	99.2714	5.5566	2.4434	8	2.4061	0.0033	0.107	3.1312	6.3504	11.998	0.0176	0.0078	0.0043	16	0.66976
10Ca80.	6	26.977	20.597	<0.05	18.5088	20.9623	0.6456	<0.07	<0.05	<0.05	11.7973	99.5646	5.485	2.515	8	2.4207	0.0033	0.1112	3.1473	6.3538	12.0363	0.008	0.0041	0	16	0.668744
10Ca80.	15	27.9119	19.1176	<0.05	18.7558	20.8329	1.0266	0.0937	<0.05	<0.05	11.772	99.5997	5.6873	2.3127	8	2.2783	0.0041	0.1772	3.1961	6.3282	11.9839	0.0122	0.0006	0.0205	16	0.664427
10Ca80.	16	26.8166	20.1833	<0.05	18.3635	21.1397	0.5514	<0.07	<0.05	<0.05	11.7124	98.829	5.4919	2.5081	8	2.3635	0.0039	0.0957	3.1452	6.454	12.0621	0.0048	0.0047	0.0015	16	0.672348
10Ca80.	17	27.4691	19.7203	<0.05	18.4792	21.3271	0.6405	<0.07	<0.05	<0.05	11.7913	99.4849	5.5879	2.4121	8	2.3159	0.0015	0.1104	3.1438	6.4677	12.0393	0	0.0088	0.0027	16	0.672913
10Ca80.	18	26.8102	20.4175	<0.05	18.4265	21.0419	0.6766	<0.07	<0.05	<0.05	11.7517	99.2155	5.4722	2.5278	8	2.3839	0.0069	0.117	3.1454	6.4026	12.0558	0.0096	0.0009	0.004	16	0.67057
10Ca80.	21	26.8829	20.5536	<0.05	18.2876	20.828	0.6211	<0.07	<0.05	0.0723	11.7444	99.0492	5.4905	2.5095	8	2.438	0.0054	0.1075	3.1236	6.3415	12.016	0.0075	0.0188	0.0012	16	0.669988
10Ca80.	29	26.9749	20.3779	<0.05	18.5281	20.9789	0.5927	<0.07	<0.05	<0.05	11.7649	99.3044	5.4997	2.5003	8	2.3963	0.0038	0.1024	3.1592	6.3763	12.0381	0	0.0103	0.0049	16	0.668691
10Ca80.	32	27.2252	20.1133	<0.05	18.3043	20.9225	0.5991	<0.07	<0.05	<0.05	11.7458	99.0132	5.5598	2.4402	8	2.4006	0.0008	0.1036	3.1261	6.3695	12.0007	0	0.0072	0.0144	16	0.670784
10Ca80.	44	29.1356	20.6027	<0.05	16.9766	20.1331	0.5953	<0.07	<0.05	0.8456	11.9924	100.32	5.8275	2.1725	8	2.6842	0	0.1009	2.8397	6.0032	11.628	0.0016	0.2158	0.0075	16	0.678872
10Ca80.	48	27.0883	20.2985	<0.05	18.3866	21.0717	0.5462	<0.07	<0.05	<0.05	11.7681	99.2269	5.5213	2.4787	8	2.3975	0.0031	0.0943	3.1342	6.4028	12.0319	0.0021	0.0066	0	16	0.671364
10Ca82.	19	26.701	19.6504	<0.05	21.7186	18.571	0.39	<0.07	<0.05	<0.05	11.5156	98.6503	5.5617	2.4383	8	2.3858	0.0024	0.0688	3.7834	5.7667	12.007	0.0152	0.0061	0.0062	16	0.603837
10Ca82.	20	25.6998	19.7033	<0.05	21.882	18.3007	0.4171	<0.07	<0.05	<0.05	11.3288	97.397	5.4414	2.5586	8	2.3582	0.0029	0.0748	3.8747	5.7764	12.0871	0.0077	0	0.0063	16	0.598522
10Ca82.	21	26.2047	19.5711	<0.05	21.6569	18.4699	0.3706	<0.07	<0.05	0.3517	11.42	98.1417	5.504	2.496	8	2.3488	0.005	0.0659	3.8042	5.7833	12.0072	0.0071	0.0943	0.0107	16	0.603213
10Ca82.	47	25.5479	19.5276	<0.05	21.6659	18.3969	0.3047	0.0728	<0.05	<0.05	11.2703	96.8496	5.4374	2.5626	8	2.3356	0.0016	0.0549	3.8564	5.837	12.0854	0.0156	0.0043	0.0166	16	0.602162
10Ca82.	48	26.0015	20.0963	<0.05	21.0535	19.0735	0.4016	0.07	<0.05	<0.05	11.481	98.2042	5.4323	2.5677	8	2.3807	0.0021	0.0711	3.6786	5.9406	12.073	0.0055	0	0.0157	16	0.617577
10Ca82.	49	25.8389	19.9112	<0.05	20.4926	18.9491	0.3383	0.0728	<0.05	<0.05	11.3652	97.0116	5.4533	2.5467	8	2.406	0.0019	0.0605	3.6171	5.9619	12.0474	0.0044	0.0036	0.0165	16	0.622393
10Ca82.	50	26.0614	19.8564	<0.05	20.7203	18.5992	0.3306	0.0742	<0.05	<0.05	11.3715	97.1113	5.4973	2.5027	8	2.4336	0.004	0.0591	3.6552	5.8486	12.0005	0.0204	0.0062	0.0168	16	0.615396
10Ca82.	58	26.04	19.7657	<0.05	21.2516	18.8612	0.4287	<0.07	<0.05	<0.05	11.4239	97.8666	5.4676	2.5324	8	2.3588	0.0011	0.0762	3.7318	5.9038	12.0717	0	0.009	0.0079	16	0.612707
10Ca82.	59	25.7704	19.5635	0.2636	21.3597	18.5594	0.3409	0.2449	0.0674	<0.05	11.3678	97.5872	5.4377	2.5623	8	2.3028	0.0418	0.0609	3.7692	5.838	12.0128	0.0276	0.0097	0.0554	16	0.607669
10Ca82.	60	26.3545	19.4426	<0.05	21.2838	19.0768	0.3719	0.2812	<0.05	<0.05	11.4816	98.3565	5.5058	2.4942	8	2.293	0.0084	0.0658	3.7186	5.9413	12.0271	0.0044	0	0.063	16	0.615048
10Ca82.	115	26.0742	19.3084	<0.05	19.668	19.3106	0.3396	<0.07	<0.05	0.1012	11.3053	96.1903	5.5322	2.4678	8	2.3604	0.0032	0.061	3.4899	6.1079	12.0225	0	0.0274	0.0143	16	0.636385
10Ca84.	49	25.1671	19.7978	<0.05	26.992	14.8764	0.7321	<0.07	<0.05	<0.05	11.1994	98.7934	5.3902	2.6098	8	2.3876	0.0019	0.1328	4.8348	4.7498	12.1069	0	0.0046	0	16	0.495566
10Ca84.	58	24.8163	19.3859	<0.05	27.5092	14.9858	0.789	<0.07	<0.05	<0.05	11.1373	98.728	5.3447	2.6553	8	2.2655	0.0024	0.1439	4.9549	4.8115	12.1782	0.0051	0.0182	0.0026	16	0.492659
10Ca84.	60	25.7811	19.4747	<0.05	26.7295	14.8863	0.7192	<0.07	<0.05	<0.05	11.2389	98.8736	5.5023	2.4977	8	2.4009	0.0013	0.13	4.7709	4.7363	12.0395	0.0106	0	0.0022	16	0.49818
10Ca84.	84	25.2527	19.8337	<0.05	26.7578	14.8283	0.7954	<0.07	<0.05	0.0554	11.2049	98.7619	5.4059	2.5941	8	2.4099	0	0.1442	4.7905	4.7322	12.0768	0	0.0151	0.0077	16	0.496939
10Ca84.	87	25.2698	19.469	<0.05	27.0242	14.8615	0.7334	<0.07	<0.05	0.0638	11.1772	98.6913	5.4229	2.5771	8	2.3471	0.0024	0.1333	4.8501	4.7545	12.0875	0.0275	0.0175	0.0026	16	0.495023
10Ca84.	89	25.3854	19.6939	<0.05	27.5375	14.8482	0.6895	<0.07	<0.05	0.0494	11.2592	99.5171	5.4081	2.5919	8	2.3528	0.0035	0.1244	4.9063	4.7157	12.1027	0.0134	0.0134	0	16	0.490096
10Ca85.	58	23.3466	22.1162	<0.05	33.072	9.3527	0.3667	<0.07	<0.05	<0.05	10.9498	99.3108	5.1143	2.8857	8	2.8242	0.0041	0.068	6.0588	3.0543	12.0095	0.0126	0.004	0.0089	16	0.335155
10Ca85.	60	24.1445	22.6452	0.0534	31.9617	9.0326	0.3861	<0.07	<0.05	0.3542	11.0683	99.6977	5.2325	2.7675	8	3.0163	0.0087	0.0709	5.7928	2.9182	11.8068	0.017	0.0979	0.0026	16	0.335002
10Ca85.	61	23.7167	21.9575	<0.05	33.409	9.2781	0.3125	<0.07	0.0526	<0.05	10.9998	99.7772	5.1717	2.8283	8	2.8149	0.006	0.0577	6.0928	3.0161	11.9875	0.0222	0.004	0	16	0.331116
10Ca85.	65	24.0397	22.2144	0.0651	32.659	9.4306	0.4545	<0.07	<0.05	0.0964	11.0752	100.049	5.2065	2.7935	8	2.8768	0.0106	0.0834	5.9155	3.0449	11.9312	0	0.0266	0.0032	16	0.339817
10Ca85.	80	23.9392	22.0047	0.0617	31.9682	9.1703	0.3564	<0.07	<0.05	0.2457	10.9451	98.7177	5.2463	2.7537	8	2.9298	0.0102	0.0662	5.8591	2.996	11.8613	0.0017	0.0687	0.0053	16	0.338336
10Ca85.	85	23.7894	21.8384	<0.05	32.0724	9.3029	0.3474	<0.07	<0.05	0.1711	10.9129	98.5321	5.2289	2.7711	8	2.8862	0.0052	0.0647	5.8956	3.0483	11.9	0.0092	0.048	0.0076	16	0.340824
10Ca85.	88	23.7124	22.2806	<0.05	32.9909	9.4074	0.3319	<0.07	<0.05	<0.05	11.0356	99.8692	5.1541	2.8459	8	2.8617	0.0038	0.0611	5.997	3.0483	11.9719	0	0.0114	0.0108	16	0.337004
10Ca85.	91	23.8814	22.2881	<0.05	32.9678	9.2963	0.439	<0.07	<0.05	<0.05	11.052	99.9546	5.1831	2.8169	8	2.8842	0.0049	0.0807	5.9839	3.0078	11.9615	0	0	0	16	0.334508
10Ca85.	92	23.3487	22.1181	<0.05	32.9073	9.3726	0.4235	<0.07	<0.05	<0.05	10.9408	99.1688	5.119	2.881	8	2.834	0.0058	0.0787	6.0336	3.0633	12.0154	0	0.0007	0.0003	16	0.336741
10Ca85.	94	24.5617	21.9405	<0.05	32.9909	9.3411	0.3189	<0.07	<0.05	<0.05	11.1234	100.411	5.2965	2.7035	8	2.8726	0.0087	0.0583	5.9497	3.0029	11.8921	0.0028	0.0116	0.0074	16	0.335422
10Ca85.	96	24.044	22.6925	<0.05	33.2212	9.1686	0.3383	<0.07	0.0566	0.1988	11.1528	100.917	5.1712	2.8288	8	2.9233	0.0062	0.0616	5.9754	2.9397	11.9062	0.0236	0.0545	0.0013	16	0.329744
11Ca104.	43	28.4874	21.5777	<0.05	11.7998	23.8825	0.2182	0.1245	<0.05	<0.05	12.0735	98.1975	5.6596	2.3404	8	2.712	0	0.0367	1.9605	7.0733	11.7825	0.0083	0.0003	0.0265	16	0.782982
11Ca104.	57	28.3783	21.3415	<0.05	12.3066	23.5193	0.2221	<0.07	<0.05	<0.05	12.0011	97.8401	5.6719	2.3281	8	2.6991	0	0.0376	2.0571	7.0078	11.8016	0.0052	0.0061	0.0072	16	0.77307
10Ca91.	1	26.5171	19.2159	<0.05	22.6115	17.9857	0.3499	0.2533	<0.05	<0.05	11.425	98.4309	5.5672	2.4328	8	2.322	0.0032	0.0622	3.9702	5.6292	11.9868	0.0104	0.0052	0.057	16	0.586412
10Ca91.	7	26.3866	19.5786	<0.05	22.798	18.0868	0.3732	0.1035	<0.05	<0.05	11.4662	98.8014	5.5199	2.4801	8	2.347	0	0.0661	3.9885	5.6405	12.0422	0	0.0023	0.0232	16	0.585783
10Ca91.	17	26.1619	19.7695	<0.05	22.9074	17.6805	0.4196	0.0742	<0.05	<0.05	11.4165	98.4741	5.4968	2.5032	8	2.3921	0.0024	0.0747	4.0251	5.5378	12.0322	0.0022	0.0065	0.0167	16	0.579092
10Ca91.	33	26.7396	18.8814	<0.05	21.9927	18.4931	0.3603	0.1105	<0.05	<0.05	11.4153	98.0023	5.6187	2.3813	8	2.2947	0	0.0641	3.8648	5.7929	12.0165	0.0038	0	0.0249	16	0.599822
10Ca91.	34	26.5106	19.2839	<0.05	22.7453	17.8364	0.3151	0.0882	0.0809	<0.05	11.4119	98.323	5.5723	2.4277	8	2.3494	0.0029	0.0561	3.9983	5.5889	11.9956	0.033	0.0087	0.0199	16	0.582954
10Ca91.	35	27.3963	18.8398	<0.05	21.7945	19.0486	0.3396	<0.07	<0.05	<0.05	11.5775	99.1234	5.6761	2.3239	8	2.2764	0.0026	0.0596	3.7764	5.8834	11.9984	0.0157	0.0025	0.0137	16	0.60906
Felsic rock	lab#	SiO2	Al2O3	TiO2	FeO	MgO	MnO	CaO	Na2O	K2O	H2O*	SUM	Si	AlIV	sum	AlVI	Ti	Mn	Fe	Mg	sum	Na	K	Ca	OH	XMg
10Ca88.	59	26.6968	16.8484	1.545	35.8405	6.3628	0.2647	<0.07	<0.05	1.1504	10.7929	99.5981	5.9332	2.0668	8	2.3463	0.2583	0.0498	6.6615	2.1081	11.4241	0	0.3262	0.01	16	0.240387
10Ca88.	60	27.8584	16.9334	1.4282	33.0012	7.1787	0.3977	<0.07	<0.05	2.302	10.9663	100.2	6.0934	1.9066	8	2.4587	0.235	0.0737	6.0368	2.3408	11.1449	0.0074	0.6423	0.0144	16	0.279412
10Ca88.	66	28.0467	16.1398	2.2124	31.1628	7.3113	0.3357	0.1217	<0.05	2.7489	10.8905	99.0422	6.1773	1.8227	8	2.367	0.3666	0.0626	5.7402	2.4006	10.937	0.0104	0.7724	0.0287	16	0.294885
10Ca88.	70	27.6103	16.9693	1.6652	33.1196	7.58	0.4261	<0.07	<0.05	1.8635	10.9961	100.368	6.0228	1.9772	8	2.3854	0.2733	0.0787	6.042	2.4649	11.2444	0.0143	0.5186	0.0046	16	0.289753
10Ca88.	74	25.9993	17.4341	2.1357	35.8585	5.9234	0.2156	0.077	<0.05	0.7469	10.762	99.2164	5.7948	2.2052	8	2.3744	0.3581	0.0407	6.684	1.9681	11.4253	0.0064	0.2124	0.0184	16	0.227471
10Ca88.	77	26.8979	17.2074	1.6518	33.1389	7.4971	0.4093	<0.07	<0.05	1.8057	10.8941	99.6162	5.9223	2.0777	8	2.3876	0.2736	0.0763	6.1021	2.4608	11.3004	0.0184	0.5072	0.0033	16	0.287379
10Ca88.	92	25.7662	17.3396	0.8793	35.3671	6.6646	0.3913	0.077	<0.05	0.7938	10.6191	97.916	5.8201	2.1799	8	2.4362	0.1494	0.0749	6.6811	2.2442	11.5859	0.0065	0.2288	0.0186	16	0.251443
11Ca101a	46	25.2499	21.51	<0.05	22.55	17.07	0.2	<0.07	<0.05	<0.05	11.4024	98.0624	5.3117	2.6883	8	2.6447	0.0063	0.0356	3.9672	5.3532	12.0071	0.0041	0.0027	0	16	0.574353
11Ca101a	47	25.6799	20.68	0.0899	22.89	17.2399	0.21	<0.07	<0.05	<0.05	11.4029	98.2427	5.4019	2.5981	8	2.5289	0.0142	0.0374	4.0269	5.4063	12.0137	0	0.0134	0	16	0.573114
11Ca101a	48	25.2099	21.1201	0.11	22.1301	17.22	0.2	<0.07	<0.05	<0.05	11.338	97.4181	5.3334	2.6666	8	2.5994	0.0175	0.0358	3.9155	5.4309	11.9992	0	0.0081	0.0045	16	0.581069
11Ca101a	49	25.34	21.2999	<0.05	22.31	17.0801	0.21	<0.07	<0.05	<0.05	11.3718	97.7218	5.345	2.655	8	2.6401	0.0032	0.0375	3.9356	5.3708	11.9871	0	0.0108	0.0068	16	0.577108
11Ca101a	50	25.4301	21.05	0.0999	22.2401	17.2501	0.1701	<0.07	<0.05	<0.05	11.3703	97.6703	5.3647	2.6353	8	2.5984	0.0159	0.0304	3.9238	5.425	11.9934	0	0.0135	0	16	0.580288
11Ca101a	51	25.11	21.1699	0.0601	22.49	17.3699	0.15	<0.07	<0.05	0.05	11.3648	97.8247	5.2997	2.7003	8	2.5657	0.0095	0.0268	3.9698	5.4653	12.0372	0.0082	0.0135	0.0022	16	0.579252
11Ca101a	52	25.62	20.58	0.0899	22.53	16.77	0.18	<0.07	<0.05	<0.05	11.2945	97.1744	5.441	2.559	8	2.5922	0.0144	0.0324	4.0016	5.3094	11.9499	0.0082	0.0081	0.0068	16	0.570229
11Ca101a	53	25.0001	20.96	0.0701	21.9101	17.26	0.2	<0.07	<0.05	0.06	11.2585	96.7187	5.3264	2.6736	8	2.5894	0.0112	0.0361	3.9039	5.482	12.0227	0	0.0163	0	16	0.584068
11Ca101a	54	25.46	20.8801	0.0999	22.23	17.45	0.1701	<0.07	<0.05	0.05	11.3753	97.7354	5.3686	2.6314	8	2.5578	0.0159	0.0304	3.9203	5.4854	12.0097	0.0041	0.0134	0	16	0.5832
11Ca101a	56	25.49	20.8	<0.05	22.04	17.1801	0.22	<0.07	<0.05	0.05	11.3166	97.1666	5.4029	2.5971	8	2.5989	0.0032	0.0395	3.9069	5.4286	11.9771	0	0.0135	0.0045	16	0.581501
11Ca101a	57	25.45	21.1599	0.0799	21.79	17.2399	0.2	<0.07	<0.05	<0.05	11.358	97.3477	5.3747	2.6253	8	2.6414	0.0127	0.0358	3.8485	5.4277	11.9661	0.0041	0.0081	0.0045	16	0.585121
11Ca101a	58	25.06	21.1799	0.0701	22.5799	17.23	0.21	<0.07	<0.05	<0.05	11.3618	97.8916	5.2906	2.7094	8	2.5605	0.0111	0.0375	3.9867	5.4227	12.0186	0.0123	0.0054	0.0158	16	0.576307
11Ca101a	59	25.2499	21.0201	0.0701	21.6	17.2501	0.2	<0.07	<0.05	<0.05	11.2901	96.7603	5.3645	2.6355	8	2.6279	0.0112	0.036	3.8379	5.4635	11.9764	0	0.0081	0.0046	16	0.587385
11Ca101a	60	25.3501	21.1501	<0.05	21.95	17.09	0.1899	<0.07	<0.05	<0.05	11.3279	97.1879	5.3678	2.6322	8	2.6461	0.008	0.0341	3.8871	5.3947	11.9699	0	0.0108	0.0023	16	0.581213
11Ca101a	64	25.38	21.09	0.0701	22.33	17.33	0.21	<0.07	<0.05	0.06	11.385	97.875	5.3472	2.6528	8	2.584	0.0111	0.0375	3.9345	5.4431	12.0102	0	0.0161	0	16	0.580436
11Ca101a	65	25.92	20.7799	<0.05	22.0901	17.46	0.15	<0.07	<0.05	<0.05	11.4248	97.975	5.442	2.558	8	2.5838	0.0063	0.0267	3.8787	5.4648	11.9603	0.0122	0.008	0.0045	16	0.584877
11Ca101a	66	25.9499	21.1201	0.0799	22.12	16.89	0.1899	<0.07	<0.05	0.07	11.4196	97.8994	5.4508	2.5492	8	2.6792	0.0126	0.0338	3.8857	5.2888	11.9002	0.0122	0.0188	0.0067	16	0.576467
11Ca101a	67	27.44	21.0101	0.0701	21.1301	16.3	0.24	<0.07	0.36	<0.05	11.5394	98.1396	5.7039	2.2961	8	2.851	0.011	0.0423	3.6733	5.0511	11.6286	0.1451	0.0027	0.0067	16	0.578962
11Ca101a	68	25.7899	21.05	<0.05	21.99	16.94	0.2	<0.07	<0.05	<0.05	11.3675	97.4272	5.442	2.558	8	2.6769	0.0016	0.0357	3.8806	5.3288	11.9236	0.0082	0.0081	0.0022	16	0.578626
11Ca101a	69	25.34	20.96	<0.05	21.73	16.89	0.23	<0.07	<0.05	<0.05	11.2621	96.5721	5.3971	2.6029	8	2.6584	0.0064	0.0415	3.8706	5.3628	11.9397	0.0165	0.0027	0.0114	16	0.580804
Cations based on 56 negative charges; H2O calculated on the basis of OH = 16

## Sheet: Amphibole
Amphibole
Birchy Complex
Mafic rock	lab#		SiO2	Al2O3	TiO2	Fe2O3	FeO	MnO	MgO	CaO	K2O	Na2O	H2O	Sum	Si	AlIV	sum	AlVI	Ti	Mn	Fe3+	Fe2+	Mg	sum	Ca	Na	K	sum	OH	XMg
10Ca47.	1	scan	49.7075	1.9953	0.0334	1.1364	13.9086	0.2544	13.4868	12.653	0.2084	0.2844	1.958	95.626	7.612	0.3601	7.9721	0	0.0038	0.033	0.131	1.7813	3.0789	13	2.0761	0.0844	0.0407	2.2012	2	0.633492
10Ca47.	2	scan	50.2701	1.7761	0.0367	3.836	10.4849	0.2931	14.6907	12.3732	0.0349	0.244	1.988	96.0277	7.5818	0.3157	7.8975	0	0.0042	0.0374	0.4354	1.3225	3.303	13	1.9995	0.0713	0.0067	2.0775	2	0.714085
10Ca47.	3	scan	52.0821	1.4247	0.0167	3.6015	9.6629	0.3009	15.155	11.5323	0.0434	0.585	2.0161	96.4204	7.7457	0.2497	7.9954	0	0.0019	0.0379	0.4031	1.2018	3.36	13	1.8376	0.1687	0.0082	2.0145	2	0.736551
10Ca47.	4	scan	52.1206	1.2225	0.015	3.2789	8.9342	0.2828	15.8548	11.7282	0.0373	0.5621	2.0155	96.052	7.7536	0.2143	7.968	0	0.0017	0.0356	0.3671	1.1115	3.5161	13	1.8694	0.1621	0.0071	2.0386	2	0.759811
10Ca47.	5	scan	52.403	1.1847	0	3.1516	8.9343	0.2118	16.2495	12.0808	0.047	0.4812	2.0307	96.7756	7.7373	0.2062	7.9434	0	0	0.0265	0.3502	1.1032	3.5767	13	1.9112	0.1378	0.0088	2.0578	2	0.764268
10Ca47.	6	scan	52.2404	1.3	0.0017	2.7728	9.225	0.3112	15.9394	12.0066	0.0398	0.4583	2.0204	96.3155	7.7525	0.2274	7.9799	0	0.0002	0.0391	0.3097	1.1449	3.5263	13	1.9091	0.1319	0.0075	2.0485	2	0.754902
10Ca47.	7	scan	50.0519	3.6882	0.045	5.245	9.1168	0.3719	13.8267	10.6871	0.0831	1.166	2.005	96.2957	7.4849	0.5151	8	0.135	0.0051	0.0471	0.5902	1.1402	3.0824	13	1.7124	0.3381	0.0159	2.0668	2	0.729977
10Ca47.	8	scan	50.0498	3.1441	0.0217	5.1003	8.2371	0.2957	14.7155	10.9894	0.0928	1.042	1.9993	95.6876	7.5058	0.4942	8	0.0615	0.0024	0.0376	0.5756	1.0331	3.2899	13	1.7658	0.303	0.0177	2.0865	2	0.761022
10Ca47.	9	scan	51.1002	3.0931	0.0133	5.4082	8.2701	0.3099	14.6476	10.7641	0.0976	1.0379	2.0259	96.7679	7.5626	0.4374	8	0.1021	0.0015	0.0389	0.6023	1.0236	3.2316	13	1.7069	0.2978	0.0184	2.0231	2	0.759447
10Ca47.	10	scan	52.2618	0.6708	0.0017	2.2972	9.3853	0.2131	16.5065	12.5215	0.0217	0.2925	2.0162	96.2117	7.7718	0.1176	7.8894	0	0.0002	0.0268	0.2571	1.1672	3.6593	13	1.9951	0.0843	0.0041	2.0849	2	0.758168
10Ca47.	11	scan	52.0607	0.4743	0.0017	2.9573	8.7695	0.2815	16.6358	12.5117	0.0169	0.2278	2.0116	95.9488	7.7597	0.0833	7.843	0	0.0002	0.0355	0.3317	1.0931	3.6965	13	1.9981	0.0658	0.0032	2.0672	2	0.771776
10Ca47.	12	scan	52.5292	0.4705	0	2.7802	9.4383	0.2531	16.203	12.2976	0.0385	0.213	2.0167	96.2413	7.8098	0.0824	7.8923	0	0	0.0319	0.3111	1.1736	3.5912	13	1.959	0.0614	0.0073	2.0278	2	0.753694
10Ca47.	13	scan	52.848	0.3666	0	2.2651	9.5493	0.3215	16.3556	12.3732	0.0084	0.2238	2.021	96.3537	7.8405	0.0641	7.9046	0	0	0.0404	0.2529	1.1848	3.6173	13	1.9668	0.0644	0.0016	2.034	2	0.753275
10Ca47.	14	scan	52.7346	0.4913	0	2.8826	9.4826	0.337	16.1267	12.1353	0.0422	0.3653	2.0236	96.6212	7.8134	0.0858	7.8992	0	0	0.0423	0.3214	1.175	3.5621	13	1.9265	0.1049	0.008	2.0394	2	0.751958
10Ca47.	15	scan	52.0671	0.8673	0	3.8859	9.0944	0.4067	15.5977	11.6862	0.0554	0.5082	2.0116	96.1805	7.7609	0.1524	7.9132	0	0	0.0514	0.4359	1.1337	3.4659	13	1.8663	0.1469	0.0105	2.0237	2	0.753522
10Ca47.	16	scan	52.2469	1.1885	0	4.1554	9.1799	0.2996	15.4634	11.5742	0.0361	0.5891	2.024	96.7571	7.7396	0.2075	7.9471	0	0	0.0376	0.4632	1.1373	3.4148	13	1.8371	0.1692	0.0068	2.0131	2	0.750159
10Ca47.	17	scan	52.5891	0.3307	0.0017	2.1624	10.5758	0.3628	15.9178	12.5929	0.006	0.2089	2.0178	96.7692	7.8142	0.0579	7.8721	0	0.0002	0.0457	0.2418	1.3142	3.526	13	2.0049	0.0602	0.0011	2.0664	2	0.728482
10Ca47.	18	scan	51.7163	1.2244	0.0067	5.4669	9.0188	0.3202	15.1583	11.5239	0.0614	0.585	2.0225	97.1043	7.667	0.2139	7.8809	0	0.0007	0.0402	0.6099	1.1182	3.3501	13	1.8305	0.1682	0.0116	2.0103	2	0.749748
10Ca47.	19	scan	52.1335	0.7142	0.0133	2.3673	11.1504	0.3125	15.2163	12.4697	0.0265	0.1254	2.0075	96.5366	7.7864	0.1257	7.9121	0	0.0015	0.0395	0.2661	1.3928	3.388	13	1.9955	0.0363	0.005	2.0369	2	0.708668
10Ca49.	28		56.2774	1.0959	0.02		10.2817	0.2763	16.402	13.0112	0.0265	0.0741	2.1099	99.6108	7.9974	0.0026	8	0.1809	0.0021	0.0333		1.2219	3.4747	4.913	1.9811	0.0204	0.0048	2.0083	2	0.739833
10Ca49.	29	rim	56.6517	0.9693	0.0651		10.8735	0.3125	16.3141	12.4487	0.041	0.2898	2.1176	100.085	8.0214	0	8.0214	0.1618	0.0069	0.0375		1.2876	3.4436	4.9373	1.8886	0.0796	0.0074	1.9757	2	0.727849
10Ca49.	30	rim	55.3125	2.2466	0.0334		10.409	0.3099	15.7967	12.6069	0.065	0.2709	2.0985	99.1517	7.9029	0.0971	8	0.2813	0.0036	0.0375		1.2438	3.3647	4.9308	1.9299	0.0751	0.0119	2.017	2	0.730107
10Ca49.	31	core	56.4399	0.8351	0		9.9022	0.3616	16.5363	13.0014	0.0205	0.0512	2.1065	99.2548	8.0335	0	8.0335	0.1401	0	0.0436		1.1787	3.5088	4.8713	1.9828	0.0141	0.0037	2.0007	2	0.748544
10Ca49.	32	core	56.9213	0.5253	0.01		10.1903	0.2905	16.6972	12.3004	0.0663	0.1968	2.11	99.3081	8.0885	0	8.0885	0.088	0.0011	0.035		1.211	3.5371	4.8721	1.8728	0.0542	0.012	1.939	2	0.744951
10Ca49.	49		56.3758	0.4629	0.0017		10.328	0.2673	16.4833	12.8657	0.0084	0.058	2.0969	98.9479	8.0609	0	8.0609	0.078	0.0002	0.0324		1.235	3.5135	4.8591	1.9711	0.0161	0.0015	1.9887	2	0.739918
10Ca49.	50		56.0399	0.5442	0.0267		10.7718	0.3009	16.5098	12.6572	0.0446	0.1415	2.0947	99.1313	8.0214	0	8.0214	0.0918	0.0029	0.0365		1.2895	3.5229	4.9435	1.9412	0.0393	0.0081	1.9886	2	0.732046
10Ca49.	51		55.4173	1.3774	0.0184		10.9275	0.3151	16.0007	12.4292	0.0903	0.3977	2.0899	99.0691	7.9504	0.0496	8	0.1833	0.002	0.0383		1.3111	3.4221	4.9567	1.9105	0.1106	0.0165	2.038	2	0.722999
10Ca49.	52		56.1918	0.7633	0.0167		10.0849	0.2841	16.8332	12.8391	0.0434	0.0755	2.1038	99.2357	8.0083	0	8.0083	0.1282	0.0018	0.0343		1.202	3.5764	4.9426	1.9605	0.0209	0.0079	1.9893	2	0.748451
16Ca107.	2		52.8459	0.512	0		15.3724	0.2492	13.5017	12.8041	0.0181	0.2467	2.0045	97.5545	7.9048	0.0903	7.9951	0	0	0.0316		1.923	3.0108	12.9605	2.0521	0.0715	0.0034	2.1271	2	0.61024
16Ca107.	3	core	51.6222	1.6665	0	1.9505	13.2867	0.2918	13.9196	12.5159	0.0638	0.2682	2.0104	97.6204	7.6992	0.2929	7.9921	0	0	0.0369	0.2189	1.6573	3.0949	13	2.0001	0.0776	0.0121	2.0898	2	0.651256
16Ca107.	9	core	52.403	1.0468	0.0367	0.1782	15.6919	0.2776	13.0208	12.2571	0.0361	0.3303	1.9966	97.3042	7.8694	0.1306	8	0.0547	0.0041	0.0353	0.0201	1.9707	2.915	13	1.9722	0.0962	0.0069	2.0753	2	0.596639
16Ca107.	18		52.7817	1.3377	0.0133		14.9452	0.3912	13.4602	13.2379	0.0554	0.1065	2.023	98.3669	7.8228	0.1772	8	0.0565	0.0015	0.0491		1.8525	2.974	12.9336	2.1022	0.0306	0.0105	2.1433	2	0.616181
16Ca107.	24	core	54.9018	3.1327	0.01		14.6828	0.2634	11.6245	11.7701	0.0229	1.4639	2.0758	99.9479	7.9301	0.0699	8	0.4634	0.0011	0.0322		1.7737	2.5031	12.7735	1.8216	0.41	0.0042	2.2358	2	0.585274
16Ca107.	101	core	55.0665	5.8989	0.005		12.7067	0.3164	10.8717	9.6657	0.1205	2.0988	2.088	98.8659	7.9073	0.0927	8	0.9057	0.0005	0.0385		1.526	2.3273	12.798	1.4871	0.5843	0.0221	2.0935	2	0.603976
16Ca107.	102	core	52.7111	0.9693	0	0.6284	14.5406	0.3887	13.7289	12.4557	0.0638	0.2426	2.0131	97.7773	7.8509	0.1491	8	0.021	0	0.049	0.0704	1.8112	3.0483	13	1.9877	0.0701	0.0121	2.0699	2	0.627287
16Ca107.	110	core	49.654	2.307	0.01	1.8142	13.48	0.3667	12.7322	12.1353	0.0952	0.0903	1.9445	94.6529	7.6562	0.3438	8	0.0755	0.0012	0.0479	0.2105	1.7383	2.9267	13	2.0049	0.027	0.0187	2.0506	2	0.627374
16Ca107.	130	core	51.9195	2.0557	0.0784	0.6353	14.7968	0.3861	13.1352	12.3536	0.0759	0.3451	2.0103	97.811	7.7436	0.2564	8	0.105	0.0088	0.0488	0.0713	1.8457	2.9205	13	1.9741	0.0998	0.0144	2.0884	2	0.612752
16Ca107.	132	core	49.9963	2.0954	0.1201	3.5252	11.8916	0.4442	13.7256	12.2417	0.1217	0.3154	1.9833	96.4853	7.5583	0.3733	7.9316	0	0.0137	0.0569	0.401	1.5035	3.0933	13	1.9829	0.0925	0.0235	2.0988	2	0.672925
16Ca107.	133	core	51.9773	0.3609	0.0934	0.8901	15.0706	0.2402	13.6227	12.758	0.0084	0.0849	1.9895	97.096	7.8335	0.0641	7.8976	0	0.0106	0.0307	0.1009	1.8995	3.0607	13	2.0601	0.0248	0.0016	2.0866	2	0.617052
16Ca107.	134	core	50.8327	1.7421	0.0284	3.1266	11.8849	0.4558	14.0556	12.334	0.0976	0.2413	1.9959	96.8314	7.6362	0.3084	7.9446	0	0.0032	0.058	0.3534	1.4931	3.1477	13	1.9852	0.0703	0.0187	2.0742	2	0.678267
16Ca107.	135	core	50.7793	1.9254	0.0067	5.312	10.9245	0.4339	13.8897	12.1801	0.0783	0.1092	2.0126	97.7012	7.565	0.3381	7.9031	0	0.0007	0.0547	0.5955	1.3611	3.0848	13	1.9442	0.0315	0.0149	1.9906	2	0.693853
16Ca107.	136	core	50.7108	1.3585	0	4.4212	10.6917	0.3512	14.0323	11.931	0.0614	0	1.9788	95.5721	7.6837	0.2426	7.9263	0	0	0.0451	0.5041	1.3548	3.1696	13	1.937	0	0.0119	1.9488	2	0.700557
16Ca107.	159		52.1677	1.2433	0.0117	2.1024	14.1882	0.3112	13.4453	12.4515	0.0699	0.1469	2.0157	98.1727	7.7598	0.218	7.9777	0	0.0013	0.0392	0.2353	1.765	2.9814	13	1.9845	0.0424	0.0133	2.0401	2	0.628139
16Ca107.	161		49.8315	4.3155	0.0484	3.0876	14.0478	0.3641	12.326	12.1787	0.2096	0.736	2.0229	99.1682	7.3859	0.6141	8	0.1397	0.0054	0.0457	0.3444	1.7413	2.7235	13	1.9341	0.2115	0.0396	2.1852	2	0.609994
16Ca107.	167		51.8468	2.1294	0.0701	1.5287	14.3378	0.3732	13.2148	12.2934	0.1048	0.403	2.0196	98.3216	7.6971	0.3029	8	0.0697	0.0078	0.0469	0.1708	1.7801	2.9247	13	1.9555	0.116	0.0198	2.0913	2	0.621642
16Ca107.	2	rim	50.5225	2.821	0	1.7007	14.2576	0.3641	12.7273	12.1703	0.1168	0.4853	1.9912	97.205	7.6077	0.3923	8	0.1083	0	0.0464	0.1927	1.7955	2.857	13	1.9636	0.1417	0.0224	2.1277	2	0.614078
16Ca107.	6	rim	53.1924	0.684	0	1.2601	14.6914	0.2363	13.6675	12.4795	0.0301	0.0876	2.0252	98.3732	7.8751	0.1193	7.9945	0	0	0.0296	0.1404	1.819	3.0165	13	1.9796	0.0252	0.0057	2.0104	2	0.623824
16Ca107.	37	small	52.7282	1.1375	0		14.073	0.3719	13.898	12.7342	0.0807	0	2.0079	97.078	7.8739	0.1261	8	0.0741	0	0.047		1.7575	3.0939	12.9725	2.0375	0	0.0154	2.0528	2	0.637733
16Ca107.	39	small	53.2951	0.8937	0.0868		14.8552	0.2776	13.6775	13.0196	0.0723	0.2251	2.0286	98.4694	7.8774	0.1226	8	0.0331	0.0096	0.0348		1.8363	3.0138	12.9276	2.0619	0.0645	0.0136	2.14	2	0.621389
16Ca107.	41	small	52.095	1.6136	0.025	0.7552	15.6988	0.2492	12.8417	12.2207	0.0361	0.5257	2.0081	98.0882	7.7782	0.2218	8	0.0622	0.0028	0.0315	0.0849	1.9603	2.8584	13	1.955	0.1522	0.0069	2.1141	2	0.593189
16Ca107.	42	small	51.6029	7.2688	0.0284		13.5069	0.2905	11.1784	9.8686	1.6864	0.465	2.0399	97.9958	7.585	0.415	8	0.8442	0.0031	0.0362		1.6604	2.4494	12.9933	1.5542	0.1325	0.3162	2.003	2	0.59599
16Ca107.	43	small	53.1753	0.6594	0.01		15.3299	0.3138	13.6261	12.625	0.047	0.1752	2.0169	98.0283	7.905	0.095	8	0.0205	0.0011	0.0395		1.9059	3.0197	12.9867	2.0109	0.0505	0.0089	2.0703	2	0.613062
BVOT and cover
Mafic rock	lab#		SiO2	Al2O3	TiO2	Fe2O3	FeO	MnO	MgO	CaO	K2O	Na2O	H2O	Sum	Si	AlIV	sum	AlVI	Ti	Mn	Fe3+	Fe2+	Mg	sum	Ca	Na	K	sum	OH	XMg
10Ca68.	16		55.6869	1.5361	0	4.8616	4.5641	0.1407	19.3455	12.8097	0.0289	0.093	2.1664	101.233	7.707	0.2506	7.9576	0	0	0.0165	0.5063	0.5283	3.9913	13	1.8995	0.025	0.0051	1.9296	2	0.883109
10Ca68.	17		56.9876	0.444	0	0.5618	7.9275	0.1511	19.3869	13.4772	0	0.0944	2.1586	101.195	7.9156	0.0727	7.9882	0	0	0.0178	0.0587	0.9209	4.0144	13	2.0057	0.0254	0	2.0314	2	0.813405
10Ca68.	18		54.7884	3.3311	0.0067	2.4108	5.1136	0.1265	19.44	12.9133	0.0313	0.7319	2.1657	101.059	7.5854	0.4146	8	0.1289	0.0007	0.0148	0.2512	0.5921	4.0123	13	1.9156	0.1965	0.0055	2.1176	2	0.871406
10Ca68.	20		55.8901	1.2055	0.0017	2.4431	6.977	0.1575	18.7966	13.0434	0.0096	0.1483	2.1482	100.821	7.8008	0.1983	7.9991	0	0.0002	0.0186	0.2566	0.8144	3.911	13	1.9506	0.0401	0.0017	1.9925	2	0.827655
10Ca68.	21		53.6888	3.6731	0.0167	6.0135	2.6425	0.1382	19.3703	12.4935	0.0145	0.6147	2.1625	100.835	7.4441	0.5559	8	0.0443	0.0017	0.0162	0.6274	0.3064	4.0038	13	1.856	0.1652	0.0026	2.0242	2	0.928913
10Ca68.	22		56.7758	0.5631	0	0.8226	8.4493	0.1395	18.7999	13.2631	0.0325	0.0997	2.1512	101.097	7.9135	0.0865	8	0.006	0	0.0165	0.0863	0.9849	3.9063	13	1.9807	0.027	0.0058	2.0135	2	0.798638
10Ca68.	37		50.146	5.7326	0.2086	7.2515	6.2127	0.1278	15.6375	11.9702	0.0398	0.8587	2.1019	100.31	7.1533	0.8467	8	0.1171	0.0224	0.0154	0.7784	0.7412	3.3254	13	1.8296	0.2375	0.0072	2.0755	2	0.817735
10Ca68.	39		49.7032	6.2598	1.7569		11.0394	0.1614	15.1882	13.0784	0.0638	0.9961	2.0879	100.335	7.1376	0.8625	8	0.197	0.1898	0.0196		1.3258	3.2515	12.9837	2.0123	0.2774	0.0117	2.3014	2	0.710353
10Ca68.	42		54.4653	2.3203	0.2536	3.4143	7.4089	0.1743	17.465	12.4683	0.0289	0.3559	2.1297	100.484	7.6679	0.3321	8	0.0528	0.0269	0.0208	0.3617	0.8723	3.6655	13	1.8808	0.0971	0.0052	1.9831	2	0.80777
10Ca68.	44		54.9103	1.7421	0.0033	7.4403	2.5666	0.111	19.3173	12.2696	0.0422	0.093	2.1589	100.655	7.6262	0.2852	7.9113	0	0.0003	0.0131	0.7776	0.2981	3.9995	13	1.8258	0.025	0.0075	1.8583	2	0.930636
10Ca68.	45		55.12	1.2943	0.1101	1.9769	9.9013	0.2402	16.9542	12.9133	0.0145	0.1955	2.1213	100.856	7.7908	0.2092	8	0.0064	0.0117	0.0288	0.2103	1.1704	3.5724	13	1.9556	0.0536	0.0026	2.0126	2	0.753226
10Ca68.	46		49.9727	6.0028	0.6057	7.9145	5.5247	0.235	15.6807	11.7044	0.0675	1.0069	2.1139	100.829	7.088	0.912	8	0.0914	0.0646	0.0282	0.8448	0.6553	3.3156	13	1.7787	0.2769	0.0122	2.0678	2	0.834974
10Ca68.	47		51.4895	5.0675	0.4221	4.7187	8.3824	0.3047	15.5414	12.271	0.0229	0.8762	2.1165	101.237	7.2941	0.7059	8	0.1402	0.045	0.0366	0.503	0.9931	3.2821	13	1.8626	0.2407	0.0041	2.1087	2	0.767707
10Ca68.	49		55.0644	1.6797	0.1034	4.0131	6.3143	0.1382	18.3787	12.7426	0	0.1995	2.1435	100.783	7.7023	0.2769	7.9792	0	0.0109	0.0164	0.4224	0.7387	3.8324	13	1.9098	0.0541	0	1.9642	2	0.838398
11Ca104.	1		58.4723	0.8106	0		5.4136	0.1098	19.2194	13.2337	0.0169	0.0768	2.1629	99.5159	8.1058	0	8.1058	0.1324	0	0.0129		0.6276	3.9719	4.7448	1.9656	0.0207	0.003	1.9893	2	0.86355
11Ca104.	3		57.7022	0.8333	0.02		5.6194	0.1136	19.2294	12.6544	0.0145	0.2885	2.1408	98.616	8.0817	0	8.0817	0.1375	0.0021	0.0135		0.6582	4.015	4.8263	1.899	0.0783	0.0026	1.9799	2	0.859154
11Ca104.	4		58.4381	0.6386	0		4.8295	0.0852	19.6456	13.0756	0.0205	0.0903	2.1577	98.9811	8.1206	0	8.1206	0.1046	0	0.01		0.5613	4.0697	4.7456	1.9468	0.0243	0.0036	1.9748	2	0.878795
11Ca104.	5		57.531	0.5102	0.01		4.9877	0.1046	19.5461	13.6675	0.0422	0.0256	2.1389	98.5637	8.0648	0	8.0648	0.0843	0.0011	0.0124		0.5847	4.0847	4.7672	2.0528	0.007	0.0075	2.0673	2	0.87478
11Ca104.	6		59.2938	0.6613	0		5.1138	0.1549	19.8993	12.8559	0.012	0.1901	2.1874	100.369	8.1275	0	8.1275	0.1068	0	0.018		0.5862	4.0662	4.7773	1.8881	0.0505	0.0021	1.9407	2	0.874001
11Ca104.	7		57.8562	0.3533	0		5.2399	0.1304	19.8429	13.0476	0.0145	0.1941	2.1456	98.8245	8.085	0	8.085	0.0582	0	0.0154		0.6124	4.1337	4.8198	1.9536	0.0526	0.0026	2.0088	2	0.870968
11Ca104.	8		56.7544	1.572	0.0083		5.7609	0.1433	18.974	12.8811	0.0301	0.4435	2.135	98.7028	7.9703	0.0297	8	0.2305	0.0009	0.0171		0.6766	3.9723	4.8974	1.9382	0.1208	0.0054	2.0644	2	0.85446
11Ca104.	9		57.4497	1.5739	0.005		5.2785	0.1304	19.1614	13.1581	0.047	0.2116	2.1525	99.1681	8.0027	0	8.0027	0.2584	0.0005	0.0154		0.6149	3.9791	4.8683	1.9639	0.0572	0.0083	2.0294	2	0.866152
11Ca104.	10		57.9674	0.786	0.0067		4.9543	0.0981	19.7434	13.1805	0.006	0.1146	2.154	99.0111	8.069	0	8.069	0.129	0.0007	0.0116		0.5767	4.097	4.815	1.9658	0.0309	0.0011	1.9978	2	0.876607
11Ca104.	11		56.6389	2.3599	0.01		5.8523	0.1175	18.785	13.0938	0.0422	0.2359	2.1477	99.2831	7.9072	0.0928	8	0.2955	0.0011	0.0139		0.6833	3.9096	4.9033	1.9586	0.0639	0.0075	2.03	2	0.851227
11Ca104.	12		56.6303	2.1672	0.0284		5.5011	0.1743	18.7617	13.3177	0.0349	0.279	2.1433	99.038	7.922	0.078	8	0.2794	0.003	0.0207		0.6436	3.9126	4.8592	1.9961	0.0757	0.0062	2.078	2	0.858742
11Ca104.	13		57.255	2.0595	0.0567		5.164	0.1756	19.0453	13.0602	0.0277	0.2035	2.1549	99.2026	7.9663	0.0337	8	0.304	0.0059	0.0207		0.6009	3.9504	4.882	1.947	0.0549	0.0049	2.0068	2	0.867972
11Ca104.	14		57.6337	1.5947	0.025		5.3583	0.0801	19.3123	13.077	0.0602	0.2035	2.1602	99.505	7.9993	0.0007	8	0.2602	0.0026	0.0094		0.622	3.996	4.8902	1.9447	0.0548	0.0107	2.0102	2	0.86531
11Ca104.	15		55.0173	2.8984	0.0217		5.7931	0.1575	19.7832	11.7869	0.0072	0.186	2.1181	97.7695	7.7882	0.2118	8	0.2718	0.0023	0.0189		0.6858	4.1749	5.1537	1.7878	0.0511	0.0013	1.8401	2	0.858909
11Ca104.	16		57.6529	1.1053	0.0133		5.0238	0.1976	19.5992	13.2841	0.0301	0.0768	2.1535	99.1366	8.0271	0	8.0271	0.1814	0.0014	0.0233		0.585	4.068	4.859	1.9817	0.0207	0.0053	2.0078	2	0.874275
11Ca104.	17		57.9182	1.0846	2.5061		5.0945	0.1666	18.3472	14.1866	0.0157	0.1308	2.1987	101.76	7.8983	0.1017	8	0.0726	0.2571	0.0192		0.581	3.7299	4.6599	2.0729	0.0346	0.0027	2.1161	2	0.865225
11Ca104.	20		57.4561	1.5078	0.03		5.5821	0.1214	18.9558	12.9399	0.3216	0.0634	2.1482	99.1262	8.0195	0	8.0195	0.248	0.0032	0.0144		0.6516	3.9442	4.8614	1.9352	0.0171	0.0573	2.0096	2	0.858218
11Ca104.	26		57.285	2.3278	0.045		5.3493	0.0762	18.6324	12.9748	0.0373	0.275	2.1544	99.1572	7.9726	0.0274	8	0.3544	0.0047	0.009		0.6226	3.8658	4.8565	1.9348	0.0742	0.0066	2.0156	2	0.861287
11Ca104.	30		57.5503	2.0066	0.02		5.2875	0.0994	18.7501	12.972	0.0494	0.2629	2.1552	99.1534	8.0066	0	8.0066	0.329	0.0021	0.0117		0.6152	3.8888	4.8468	1.9337	0.0709	0.0088	2.0133	2	0.86341
11Ca104.	31		56.8314	2.239	0.0334		6.0916	0.2131	18.1614	13.105	0.0361	0.2925	2.1427	99.1462	7.9524	0.0476	8	0.3216	0.0035	0.0253		0.7129	3.7885	4.8518	1.9648	0.0794	0.0065	2.0506	2	0.841627
11Ca104.	32		57.7171	2.2296	0.03		5.4985	0.1756	18.571	12.8209	0.0133	0.3208	2.1628	99.5397	8.0013	0	8.0013	0.3643	0.0031	0.0206		0.6375	3.838	4.8635	1.9044	0.0862	0.0023	1.9929	2	0.857558
11Ca104.	33		57.3556	2.1559	0.0551		5.7301	0.1782	18.4002	12.8321	0.0566	0.3141	2.1519	99.2297	7.9917	0.0083	8	0.3457	0.0058	0.021		0.6677	3.822	4.8623	1.9157	0.0848	0.0101	2.0106	2	0.851282
11Ca104.	34		56.7074	2.2012	0.0367		5.6889	0.1549	18.1963	12.8559	0.059	0.2817	2.1309	98.313	7.979	0.021	8	0.3441	0.0039	0.0185		0.6694	3.8168	4.8527	1.9382	0.0769	0.0106	2.0256	2	0.850787
11Ca104.	35		55.9158	2.8833	0.1635		6.3334	0.1549	17.5628	12.6558	0.0398	0.3451	2.1212	98.2058	7.9037	0.0963	8	0.384	0.0174	0.0186		0.7487	3.7008	4.8695	1.9167	0.0946	0.0072	2.0201	2	0.831734
11Ca104.	36		57.7877	1.4511	0.0184		5.0019	0.093	18.9757	13.091	0.0048	0.1779	2.1499	98.7514	8.0591	0	8.0591	0.2385	0.0019	0.011		0.5834	3.9451	4.7799	1.9561	0.0481	0.0009	2.0051	2	0.871171
11Ca104.	37		57.8155	1.7761	0.025		5.1344	0.0943	19.168	12.9776	0.0133	0.2278	2.1626	99.398	8.0158	0	8.0158	0.2902	0.0026	0.0111		0.5953	3.9617	4.861	1.9278	0.0612	0.0023	1.9916	2	0.869366
11Ca104.	38		57.8904	1.6911	0.0083		5.5538	0.1924	18.9906	12.8923	0.0313	0.2548	2.1638	99.6687	8.0219	0	8.0219	0.2762	0.0009	0.0226		0.6436	3.923	4.8662	1.9141	0.0684	0.0055	1.9881	2	0.859064
11Ca104.	39		57.976	1.2867	0.0133		5.4998	0.1614	19.0768	12.9455	0.0494	0.2022	2.1578	99.3688	8.0561	0	8.0561	0.2107	0.0014	0.019		0.6391	3.9518	4.822	1.9274	0.0545	0.0088	1.9906	2	0.86079
11Ca104.	40		56.8101	1.1979	0.0083		5.4753	0.2014	18.2245	12.5509	0.041	0.1645	2.1028	96.7766	8.1005	0	8.1005	0.2013	0.0009	0.0243		0.6529	3.8739	4.7534	1.9175	0.0455	0.0075	1.9704	2	0.85577
11Ca104.	41		56.7352	1.4587	0		5.622	0.1769	19.503	12.5845	0.0361	0.0593	2.1319	98.3076	7.9792	0.0208	8	0.221	0	0.0211		0.6612	4.089	4.9923	1.8963	0.0162	0.0065	1.919	2	0.860806
11Ca104.	42		57.0261	1.9991	0		5.7352	0.111	19.5743	12.5397	0	0.058	2.1529	99.2008	7.9418	0.0582	8	0.2699	0	0.0131		0.668	4.0639	5.0149	1.8711	0.0157	0	1.887	2	0.85883
11Ca104.	44		57.8883	1.0279	0		5.797	0.1756	19.3587	12.7874	0	0.1348	2.1547	99.3343	8.0553	0	8.0553	0.1686	0	0.0207		0.6746	4.0159	4.8798	1.9065	0.0364	0	1.9435	2	0.856177
11Ca104.	45		58.5151	0.8049	0		5.3415	0.1382	19.4449	13.1679	0.0241	0.1591	2.168	99.7637	8.0927	0	8.0927	0.1312	0	0.0162		0.6178	4.0091	4.7743	1.9513	0.0427	0.0043	1.9982	2	0.866476
11Ca104.	46		58.9964	0.684	0		5.4393	0.1033	19.4798	13.1525	0.0084	0.1051	2.1781	100.147	8.1215	0	8.1215	0.111	0	0.012		0.6262	3.9976	4.7468	1.94	0.0281	0.0015	1.9695	2	0.86457
11Ca104.	47		58.1215	0.5801	0		5.6516	0.164	19.4151	13.0462	0.0181	0.0674	2.1527	99.2166	8.0953	0	8.0953	0.0952	0	0.0193		0.6583	4.0313	4.8042	1.9469	0.0182	0.0032	1.9684	2	0.859626
11Ca104.	51		54.1444	3.1649	0.0584		5.9732	0.1511	18.4118	13.1064	0.0373	0.4057	2.0989	97.5521	7.7348	0.2652	8	0.2676	0.0063	0.0183		0.7136	3.921	4.9268	2.0061	0.1124	0.0068	2.1253	2	0.846028
11Ca104.	56		57.7963	0.7161	0.0017		5.4303	0.1756	19.3438	13.0574	0.006	0.1348	2.1446	98.8066	8.0803	0	8.0803	0.118	0.0002	0.0208		0.6349	4.0316	4.8055	1.9559	0.0365	0.0011	1.9936	2	0.863945
11Ca104.	60		59.0457	0.6538	0.015		5.0379	0.0839	19.5793	13.0434	0.0301	0.1078	2.175	99.7719	8.1398	0	8.1398	0.1062	0.0016	0.0098		0.5808	4.0237	4.7221	1.9266	0.0288	0.0053	1.9607	2	0.873863
11Ca104.	61		58.0059	1.6004	0.0184		5.339	0.0878	18.7999	13.2029	0.0385	0.2319	2.1618	99.4887	8.0452	0	8.0452	0.2616	0.0019	0.0103		0.6193	3.8871	4.7802	1.962	0.0623	0.0068	2.0313	2	0.862573
11Ca104.	64		58.1514	0.9466	0.0083		5.3004	0.0943	19.634	13.119	0.0145	0.0526	2.1626	99.4846	8.0626	0	8.0626	0.1547	0.0009	0.0111		0.6146	4.0582	4.8394	1.9489	0.0141	0.0026	1.9656	2	0.868473
11Ca104.	65		56.5405	0.3949	0.0083		5.1254	0.1265	19.8313	13.4968	0.0145	0.1024	2.116	97.7567	8.0116	0	8.0116	0.0659	0.0009	0.0152		0.6074	4.1891	4.8785	2.0491	0.0281	0.0026	2.0799	2	0.873366
11Ca104.	68		57.3107	0.7803	0.005		5.474	0.1756	19.1199	13.3624	0.0578	0.093	2.1338	98.5126	8.0531	0	8.0531	0.1292	0.0005	0.0209		0.6433	4.0052	4.7991	2.0118	0.0253	0.0104	2.0475	2	0.861611
10Ca73.	6		55.1606	0.8956	0.015	2.1144	9.757	0.1446	16.8282	12.5005	0.0277	0.2426	2.1032	99.7961	7.8639	0.1361	8	0.0143	0.0016	0.0175	0.2268	1.1633	3.5765	13	1.9094	0.0671	0.005	1.9819	2	0.754568
10Ca73.	7		51.5644	3.282	0.035	10.0515	4.2889	0.1963	16.2627	11.5924	0.0446	0.2602	2.0993	99.695	7.3648	0.5525	7.9172	0	0.0038	0.0237	1.0803	0.5123	3.4627	13	1.774	0.072	0.0081	1.8552	2	0.871119
10Ca73.	20		54.6493	1.6042	0.005	2.99	9.3422	0.1627	16.6508	12.5775	0.0265	0.2265	2.1119	100.346	7.7587	0.2413	8	0.0271	0.0005	0.0196	0.3194	1.1092	3.5241	13	1.9132	0.0623	0.0048	1.9804	2	0.760603
10Ca73.	21		54.4226	1.693	0.03	2.0188	10.5686	0.1123	16.2097	12.6348	0.0434	0.2804	2.1002	100.127	7.7697	0.2303	8	0.0545	0.0032	0.0136	0.2169	1.2619	3.4499	13	1.9327	0.0776	0.0079	2.019	2	0.732183
10Ca73.	22		52.7667	2.5489	0.4338	3.8942	9.7378	0.1859	15.3822	11.9142	0.0265	0.5931	2.0818	99.5987	7.5999	0.4001	8	0.0326	0.047	0.0227	0.4221	1.1729	3.3027	13	1.8386	0.1656	0.0049	2.011	2	0.737935
10Ca73.	23		51.3783	3.2612	0.4772	3.6603	11.7391	0.2815	13.9859	12.1969	0.047	0.5284	2.0583	99.614	7.4844	0.5156	8	0.0443	0.0523	0.0347	0.4012	1.4302	3.0372	13	1.9037	0.1492	0.0087	2.0617	2	0.679859
10Ca73.	24		52.6084	1.8876	0.1485	2.7274	13.9435	0.3202	13.4138	12.2431	0.0385	0.4165	2.051	99.7986	7.6907	0.3093	8	0.016	0.0163	0.0397	0.3	1.7047	2.9233	13	1.9177	0.1181	0.0072	2.0429	2	0.631655
10Ca73.	25		54.9317	0.7917	0.005	2.0289	9.812	0.1407	16.7967	12.4473	0.012	0.3114	2.0933	99.3809	7.8681	0.1319	8	0.0018	0.0005	0.0171	0.2187	1.1754	3.5866	13	1.9103	0.0865	0.0022	1.9995	2	0.753171
10Ca73.	30		52.7303	3.0742	0.3988	2.2568	12.755	0.1937	14.0423	12.078	0.053	0.6632	2.0784	100.354	7.6067	0.3933	8	0.1294	0.0433	0.0237	0.245	1.5388	3.0198	13	1.8668	0.1855	0.0098	2.0638	2	0.66244
10Ca73.	37		51.4981	3.2688	0.3087	8.049	7.2524	0.2234	15.1799	11.6456	0.0193	0.4731	2.0878	100.006	7.3956	0.5532	7.9488	0	0.0333	0.0272	0.8698	0.871	3.2498	13	1.7919	0.1317	0.0035	1.9272	2	0.788633
10Ca73.	38		52.1934	2.7057	0.3087	3.7372	10.9623	0.1692	14.6161	12.0766	0.0157	0.5068	2.0649	99.3564	7.5789	0.4211	8	0.0419	0.0337	0.0208	0.4084	1.3313	3.1639	13	1.8789	0.1427	0.0029	2.0245	2	0.70384
10Ca73.	39		50.9461	3.2839	0.2853	6.8713	8.653	0.2608	14.5779	11.6358	0.0349	0.6106	2.0617	99.2215	7.409	0.5628	7.9718	0	0.0312	0.0321	0.752	1.0524	3.1605	13	1.8131	0.1722	0.0065	1.9917	2	0.750196
10Ca73.	41		52.6811	2.3316	0.1969	2.3775	11.1579	0.1369	15.1367	12.2529	0.0169	0.523	2.0614	98.8963	7.6624	0.3376	8	0.062	0.0215	0.0169	0.2602	1.3572	3.2821	13	1.9095	0.1475	0.0031	2.0614	2	0.707456
10Ca73.	42		53.9818	1.0921	0.0934	0.6594	12.3784	0.1808	15.3656	12.5733	0.0181	0.2319	2.0584	98.6331	7.8631	0.1369	8	0.0506	0.0102	0.0223	0.0723	1.5079	3.3366	13	1.9623	0.0655	0.0034	2.0312	2	0.68874
10Ca73.	43		52.3453	2.5224	0.1201	4.9783	9.5665	0.1963	14.8897	11.7296	0.0193	0.5001	2.0647	98.9332	7.6016	0.3984	8	0.0334	0.0131	0.0241	0.544	1.1619	3.2235	13	1.8251	0.1408	0.0036	1.9695	2	0.735053
10Ca73.	45		54.2193	0.7766	0.005	0.6116	11.3845	0.2608	15.9493	12.3284	0.0277	0.426	2.0554	98.0468	7.9093	0.0907	8	0.0428	0.0005	0.0322	0.0671	1.3889	3.4684	13	1.9269	0.1205	0.0052	2.0527	2	0.714059
10Ca75.	62		54.1979	1.8044	0.1151	2.3885	12.0949	0.4455	14.3375	11.8905	0.053	0.2763	2.0775	99.6811	7.8221	0.1779	8	0.129	0.0125	0.0545	0.2594	1.4599	3.0848	13	1.8387	0.0773	0.0098	1.9258	2	0.678769
10Ca75.	63		54.1829	1.6363	0.0734	2.7257	11.3927	0.3964	15.0207	12.2906	0.0446	0.1752	2.0867	100.025	7.7855	0.2145	8	0.0625	0.0079	0.0483	0.2947	1.369	3.2175	13	1.8922	0.0488	0.0082	1.9492	2	0.701515
10Ca79.	12		54.3177	3.2178	0.0467	0.0246	9.8903	0.2453	16.9459	13.2183	0.0819	0.2292	2.1197	100.34	7.6832	0.3168	8	0.2197	0.005	0.0294	0.0026	1.17	3.5734	13	2.0033	0.0628	0.0148	2.0811	2	0.753341
10Ca79.	14		55.0857	2.3184	0.0167	1.3167	8.6197	0.2092	17.6291	13.0616	0.065	0.151	2.1331	100.612	7.7428	0.2572	8	0.1268	0.0018	0.0249	0.1393	1.0132	3.694	13	1.9671	0.0411	0.0117	2.0202	2	0.784755
10Ca79.	16	core	54.2022	2.7227	0.1335	1.1013	10.1823	0.3293	16.1068	12.6376	0.0771	0.2076	2.1022	99.8026	7.7307	0.2693	8	0.1884	0.0143	0.0398	0.1182	1.2146	3.4247	13	1.9313	0.0574	0.014	2.0027	2	0.738193
10Ca79.	17	rim	56.1019	1.4624	0.0033	1.0021	7.5223	0.1524	18.7004	13.0196	0.0554	0.1213	2.1422	100.283	7.8523	0.1477	8	0.0936	0.0004	0.0181	0.1055	0.8805	3.9019	13	1.9525	0.0329	0.0099	1.9953	2	0.815887
10Ca79.	20	rim	53.4834	3.7166	0.3053	0.7921	9.4724	0.2776	16.6707	13.0224	0.0735	0.3437	2.1149	100.281	7.5823	0.4177	8	0.2033	0.0326	0.0333	0.0845	1.1231	3.5232	13	1.9781	0.0945	0.0133	2.0863	2	0.758281
10Ca79.	24	core	55.3938	1.6212	0.0133	0.3897	8.3512	0.1821	18.2775	13.1316	0.0398	0.1685	2.1217	99.6903	7.8279	0.1721	8	0.0979	0.0014	0.0218	0.0414	0.987	3.8504	13	1.9883	0.0462	0.0072	2.0416	2	0.795965
10Ca79.	25	rim	53.2181	3.7071	0.0467	1.4236	9.0637	0.3034	16.8133	13.1819	0.112	0.2898	2.1126	100.293	7.5532	0.4468	8	0.1733	0.005	0.0365	0.1521	1.0758	3.5574	13	2.0046	0.0798	0.0203	2.1058	2	0.767806
10Ca79.	26	core	54.8419	2.1615	0.0217	1.6984	8.7226	0.2234	17.4119	12.9357	0.0723	0.1874	2.1248	100.418	7.7389	0.2611	8	0.0984	0.0023	0.0267	0.1804	1.0294	3.6629	13	1.9558	0.0513	0.013	2.021	2	0.780619
10Ca79.	38		54.8804	2.2352	0.1085	0.8442	10.0212	0.2557	16.7735	12.9147	0.0337	0.1914	2.1181	100.378	7.7688	0.2312	8	0.1417	0.0115	0.0307	0.0899	1.1864	3.5397	13	1.9588	0.0525	0.0061	2.0175	2	0.748968
10Ca79.	40		53.954	3.6315	0.0768	1.214	9.5161	0.2092	16.7237	13.035	0.0795	0.364	2.1282	100.932	7.6015	0.3985	8	0.2045	0.0081	0.025	0.1287	1.1212	3.5125	13	1.9677	0.0994	0.0143	2.0814	2	0.758034
10Ca79.	41		55.0472	2.3505	0.1218	1.2577	10.2474	0.3603	16.3639	12.723	0.0687	0.1887	2.1248	100.878	7.7678	0.2322	8	0.1587	0.0129	0.0431	0.1336	1.2093	3.4424	13	1.9237	0.0516	0.0124	1.989	2	0.740031
10Ca79.	42		54.5252	3.1611	0.0551	0.5893	9.6884	0.1989	16.8232	12.979	0.047	0.2534	2.1239	100.45	7.6975	0.3025	8	0.2234	0.0058	0.0238	0.0626	1.1439	3.5405	13	1.9632	0.0694	0.0085	2.0413	2	0.755807
10Ca79.	49	core	54.8761	2.2277	0.035	0.9584	9.391	0.2195	17.1797	12.993	0.0638	0.1591	2.1196	100.223	7.7627	0.2373	8	0.1341	0.0037	0.0263	0.102	1.111	3.6229	13	1.9693	0.0436	0.0115	2.0244	2	0.76531
10Ca79.	55	core	53.4556	3.4974	0.0617	1.2247	9.2222	0.2415	16.6176	12.9161	0.0711	0.2817	2.1043	99.6937	7.6168	0.3832	8	0.2041	0.0066	0.0291	0.1313	1.099	3.5298	13	1.9719	0.0778	0.0129	2.0626	2	0.762573
10Ca79.	56	rim	54.168	2.3165	0.0467	2.7423	8.1409	0.2854	17.3058	12.9441	0.0205	0.1725	2.1183	100.264	7.667	0.333	8	0.0535	0.005	0.0342	0.2921	0.9637	3.6516	13	1.963	0.0474	0.0037	2.0143	2	0.791195
10Ca82.	25		53.9797	1.0864	0.0334	1.9679	9.9724	0.2841	16.5678	12.8993	0.0193	0.0485	2.0768	98.9356	7.7931	0.1849	7.978	0	0.0036	0.0347	0.2138	1.2041	3.5658	13	1.9954	0.0136	0.0035	2.0125	2	0.747563
10Ca82.	26		53.6888	0.9391	0.1485	0.4342	12.1487	0.2905	15.7918	13.0364	0.065	0.0741	2.0569	98.6819	7.8262	0.1613	7.9875	0	0.0163	0.0359	0.0476	1.481	3.4317	13	2.0361	0.021	0.0121	2.0696	2	0.698536
10Ca82.	27		50.223	4.7407	0.0684	2.4481	9.7037	0.2699	14.9477	12.6474	0.1181	0.3316	2.0373	97.5615	7.3915	0.6085	8	0.2138	0.0076	0.0336	0.2711	1.1944	3.2795	13	1.9944	0.0946	0.0222	2.1126	2	0.733029
10Ca82.	28		50.8327	4.478	0.0717	1.559	10.9115	0.337	14.7039	12.7174	0.1217	0.3923	2.0451	98.1972	7.4528	0.5472	8	0.2265	0.0079	0.0419	0.172	1.3379	3.2138	13	1.9978	0.1115	0.0228	2.1336	2	0.706066
10Ca82.	29		50.6937	4.3873	0.1185	1.2506	10.7709	0.2983	14.9875	12.8895	0.1566	0.3356	2.0411	97.9319	7.4467	0.5533	8	0.2063	0.0131	0.0371	0.1382	1.3232	3.2821	13	2.0287	0.0956	0.0293	2.1538	2	0.712679
10Ca82.	30		49.9064	5.2697	0.1802	1.4717	9.9725	0.3009	15.1152	12.8923	0.2024	0.434	2.0409	97.7951	7.3319	0.6681	8	0.2443	0.0199	0.0374	0.1627	1.2253	3.3104	13	2.0294	0.1236	0.0379	2.1914	2	0.729854
10Ca82.	31		50.6744	4.1474	0.1802	2.905	8.1219	0.2415	16.0272	12.3648	0.6264	0.3019	2.0475	97.6382	7.4207	0.5793	8	0.1365	0.0199	0.03	0.3201	0.9947	3.4989	13	1.9401	0.0857	0.117	2.1428	2	0.778641
10Ca82.	32		50.33	4.4988	0.0918	1.1301	11.2306	0.3319	14.6675	12.8937	0.1783	0.3693	2.0317	97.7536	7.4275	0.5725	8	0.2099	0.0102	0.0415	0.1255	1.3861	3.2268	13	2.0387	0.1057	0.0336	2.178	2	0.699517
10Ca82.	33		52.5057	2.7397	0.2353		11.2852	0.2944	15.6143	12.9175	0.0723	0.2885	2.0498	98.0039	7.6753	0.3247	8	0.1473	0.0259	0.0365		1.3796	3.403	13	2.0245	0.0818	0.0135	2.1198	2	0.711538
10Ca82.	35		51.8489	2.2711	0.1068	0.868	9.1417	0.1872	16.4634	12.355	0.1156	0.4961	2.0205	95.8811	7.6939	0.3061	8	0.0911	0.0119	0.0235	0.0969	1.1345	3.642	13	1.9644	0.1427	0.0219	2.1294	2	0.762483
10Ca82.	36		54.061	0.958	0.1368	3.3477	7.3967	0.1937	18.0205	12.9539	0.041	0.1308	2.0994	99.3394	7.7208	0.1612	7.882	0	0.0147	0.0234	0.3598	0.8835	3.8366	13	1.9822	0.0362	0.0075	2.0259	2	0.812822
10Ca82.	37		53.5411	1.2093	0.1735	1.8566	7.9923	0.2647	17.7386	12.9511	0.0265	0.1361	2.0722	97.9732	7.747	0.2062	7.9532	0	0.0189	0.0324	0.2021	0.9671	3.8262	13	2.0078	0.0382	0.0049	2.0515	2	0.798239
10Ca82.	38		53.892	1.6703	0.0384	0.7055	9.6366	0.2518	17.2643	13.0742	0.0361	0.3707	2.0857	99.0255	7.7474	0.2526	8	0.0304	0.0042	0.0307	0.0763	1.1586	3.6999	13	2.0138	0.1033	0.0066	2.1238	2	0.761531
10Ca82.	39		53.8685	1.3944	0.1335	1.3184	9.7013	0.2763	17.0206	13.0658	0.0518	0.1671	2.0833	99.0809	7.753	0.2365	7.9895	0	0.0145	0.0337	0.1428	1.1677	3.6519	13	2.0148	0.0466	0.0095	2.071	2	0.757718
10Ca82.	41		50.9247	1.4247	0.0584	0.7147	9.582	0.2789	16.4634	12.9175	0.0554	0.1901	1.983	94.5927	7.6999	0.2539	7.9537	0	0.0066	0.0357	0.0813	1.2117	3.7109	13	2.0927	0.0557	0.0107	2.1591	2	0.75385
10Ca82.	42		53.8235	1.606	0.045	2.0356	8.6083	0.2621	17.2759	12.8923	0.0458	0.1631	2.0863	98.8753	7.7352	0.2648	8	0.0072	0.0049	0.0319	0.2201	1.0346	3.7012	13	1.9852	0.0454	0.0084	2.0408	2	0.781536
10Ca82.	43		53.83	1.9405	0.0384	2.0665	8.5895	0.3564	17.0222	12.6894	0.0325	0.2642	2.0887	98.945	7.7272	0.2728	8	0.0554	0.0041	0.0433	0.2232	1.0312	3.6427	13	1.9517	0.0735	0.006	2.0327	2	0.779371
10Ca82.	44		54.7798	0.7747	0.015	0.8195	8.8522	0.2583	17.9144	13.0826	0.0446	0.1321	2.0907	98.7638	7.856	0.1309	7.9869	0	0.0016	0.0314	0.0884	1.0617	3.8299	13	2.0102	0.0367	0.0082	2.0551	2	0.782954
10Ca82.	51		50.5397	4.3004	0.4905	4.4815	8.7244	0.2337	15.4037	12.723	0.1	0.2655	2.0713	99.3338	7.3159	0.6841	8	0.0495	0.0534	0.0287	0.4882	1.0562	3.324	13	1.9733	0.0745	0.0185	2.0663	2	0.758869
10Ca82.	52		53.37	1.1016	0.0701	3.5395	6.3301	0.1808	18.5462	13.1036	0.0337	0.1388	2.0868	98.5011	7.6681	0.1865	7.8547	0	0.0076	0.022	0.3827	0.7606	3.9724	13	2.0172	0.0387	0.0062	2.0621	2	0.839299
10Ca82.	53		53.432	1.3699	0.4155	1.3975	8.9212	0.2182	17.2875	12.9609	0.0482	0.1065	2.0718	98.2292	7.7327	0.2336	7.9664	0	0.0452	0.0268	0.1522	1.0798	3.7297	13	2.0097	0.0299	0.0089	2.0485	2	0.775486
10Ca82.	69		53.1989	2.2825	0.0534	0.7679	9.9973	0.2544	16.397	12.7957	0.0542	0.2575	2.0649	98.1235	7.7248	0.2752	8	0.1155	0.0058	0.0313	0.0839	1.2141	3.5495	13	1.9908	0.0725	0.01	2.0733	2	0.74513
10Ca82.	70		51.4596	3.7279	0.0851	1.9507	10.0793	0.3306	15.5298	12.8923	0.094	0.3329	2.0584	98.5404	7.4959	0.5041	8	0.1359	0.0093	0.0408	0.2138	1.2279	3.3723	13	2.0121	0.094	0.0175	2.1236	2	0.733077
10Ca82.	71		52.4736	2.5111	0.0551	1.5735	10.1742	0.244	15.9642	12.8209	0.0783	0.2278	2.0567	98.1795	7.6498	0.3502	8	0.0813	0.006	0.0301	0.1726	1.2404	3.4695	13	2.0026	0.0644	0.0146	2.0816	2	0.73664
10Ca82.	72		51.7569	3.2083	0.0901	0.7744	10.4391	0.2389	15.9841	13.1302	0.0723	0.3114	2.0515	98.0572	7.5643	0.4357	8	0.1169	0.0099	0.0296	0.0852	1.2759	3.4825	13	2.0561	0.0882	0.0135	2.1578	2	0.731864
10Ca82.	73		53.4513	0.9957	0.1068	0.7049	10.7345	0.275	16.4285	13.0308	0.0602	0.0297	2.0512	97.8698	7.813	0.1715	7.9846	0	0.0117	0.0341	0.0775	1.3122	3.5799	13	2.0408	0.0084	0.0112	2.0605	2	0.731772
10Ca82.	85		54.4439	0.8729	0.0267	0.8021	8.5218	0.1859	17.9774	13.0434	0.0398	0.0917	2.0799	98.0855	7.8484	0.1483	7.9967	0	0.0029	0.0227	0.087	1.0274	3.8634	13	2.0146	0.0256	0.0073	2.0476	2	0.789932
10Ca82.	87		52.1335	2.6906	0.0417	0.9347	10.0967	0.2479	16.0107	12.8699	0.0614	0.1995	2.0426	97.3292	7.6527	0.3473	8	0.1182	0.0046	0.0308	0.1033	1.2395	3.5036	13	2.0242	0.0568	0.0115	2.0925	2	0.738673
10Ca82.	88		52.3838	2.7907	0.0667	0.4269	10.8972	0.2918	15.7238	12.8685	0.1626	0.2184	2.0491	97.8795	7.6649	0.3351	8	0.1461	0.0073	0.0362	0.047	1.3335	3.4298	13	2.0175	0.062	0.0304	2.1098	2	0.720047
10Ca82.	89		50.2423	5.4908	0.1051	1.0475	10.8366	0.2725	14.6376	12.7678	0.1747	0.5001	2.0457	98.1206	7.3639	0.6361	8	0.3124	0.0116	0.0338	0.1155	1.3283	3.1983	13	2.0051	0.1421	0.0327	2.1798	2	0.706557
10Ca82.	90		51.6371	3.8356	0.0534	0.6886	10.9653	0.2337	14.9759	12.5411	0.1168	0.3087	2.0391	97.3953	7.5928	0.4072	8	0.2576	0.0059	0.0291	0.0762	1.3484	3.2828	13	1.9758	0.088	0.0219	2.0858	2	0.708844
10Ca82.	91		52.0928	3.1176	0.0901	1.4281	10.296	0.3383	15.4866	12.674	0.0687	0.2224	2.0502	97.8794	7.6182	0.3818	8	0.1555	0.0099	0.0419	0.1572	1.2592	3.3763	13	1.9859	0.0631	0.0128	2.0626	2	0.728357
10Ca82.	92		49.716	5.4946	0.1051	2.4816	10.0157	0.2815	14.4602	12.5509	0.1891	0.4071	2.0368	97.7408	7.3187	0.6813	8	0.2719	0.0116	0.0351	0.2749	1.2331	3.1733	13	1.9796	0.1162	0.0355	2.1315	2	0.720157
10Ca82.	93		52.6341	2.3958	0.0334	0.9135	10.9392	0.2854	15.5414	12.7202	0.0434	0.1874	2.0464	97.7401	7.7116	0.2884	8	0.1253	0.0037	0.0354	0.1007	1.3404	3.3945	13	1.9968	0.0532	0.0081	2.0582	2	0.716911
10Ca82.	94		51.697	3.9017	0.0601	1.0857	10.8653	0.2466	15.0654	12.646	0.1193	0.3141	2.0507	98.0877	7.5587	0.4413	8	0.231	0.0066	0.0305	0.1195	1.3286	3.2838	13	1.9811	0.089	0.0222	2.0944	2	0.71195
10Ca82.	95		50.8049	4.1228	0.0984	1.3838	10.6485	0.2466	14.9792	12.758	0.0903	0.3181	2.0348	97.4856	7.4862	0.5138	8	0.2022	0.0109	0.0308	0.1534	1.3122	3.2904	13	2.0142	0.0909	0.017	2.1221	2	0.7149
10Ca82.	96		51.3761	4.1776	0.0968	1.2571	10.5477	0.2944	15.0754	12.6614	0.1349	0.3303	2.0495	98.0012	7.516	0.484	8	0.2362	0.0107	0.0365	0.1384	1.2905	3.2878	13	1.9846	0.0937	0.0252	2.1035	2	0.718127
10Ca82.	97		51.0039	3.8696	0.1385	1.1842	10.0639	0.2428	15.3954	12.6754	0.1361	0.3019	2.0327	97.0445	7.5233	0.4767	8	0.196	0.0154	0.0303	0.1314	1.2415	3.3854	13	2.0033	0.0864	0.0256	2.1152	2	0.731678
10Ca82.	98		49.808	5.3188	0.1018	1.4019	10.9513	0.2867	14.3308	12.7006	0.1988	0.403	2.029	97.5307	7.3602	0.6398	8	0.2865	0.0113	0.0359	0.1559	1.3534	3.157	13	2.0109	0.1155	0.0375	2.1638	2	0.699938
10Ca82.	99		51.7741	2.8323	0.0617	1.8458	10.1993	0.3177	15.6044	12.8293	0.0542	0.2022	2.0437	97.7647	7.5959	0.4041	8	0.0856	0.0068	0.0395	0.2038	1.2514	3.4129	13	2.0167	0.0575	0.0101	2.0844	2	0.731707
10Ca82.	100		51.3269	4.051	0.0968	1.2164	10.4441	0.2402	15.3092	12.8097	0.112	0.31	2.0492	97.9767	7.5099	0.4901	8	0.2084	0.0107	0.0298	0.1339	1.278	3.3392	13	2.0082	0.088	0.0209	2.1177	2	0.723209
10Ca82.	101		51.5986	4.8408	0.1318	1.9212	8.8026	0.3034	15.4485	12.0402	0.5903	0.3033	2.0642	98.0448	7.495	0.505	8	0.3237	0.0144	0.0373	0.21	1.0693	3.3452	13	1.8739	0.0854	0.1094	2.0687	2	0.757776
10Ca82.	102		51.3505	3.7865	0.1118	1.2901	9.4836	0.2686	15.8117	12.7006	0.0952	0.3276	2.0434	97.3074	7.5346	0.4654	8	0.1894	0.0123	0.0334	0.1424	1.1638	3.4586	13	1.9967	0.0932	0.0178	2.1099	2	0.748226
10Ca82.	104	scan	51.727	3.0855	0.0551	1.0811	10.5786	0.2505	15.3706	12.639	0.0711	0.2669	2.034	97.1594	7.6249	0.3751	8	0.1609	0.0061	0.0313	0.1199	1.3041	3.3777	13	1.9962	0.0763	0.0134	2.0858	2	0.721453
10Ca82.	105	scan	50.407	4.7199	0.1168	2.7029	9.7022	0.3138	14.6343	12.3004	0.1301	0.3693	2.0363	97.4329	7.4222	0.5778	8	0.2413	0.0129	0.0391	0.2995	1.1948	3.2124	13	1.9406	0.1054	0.0244	2.0705	2	0.728898
10Ca82.	106	scan	49.6454	5.436	0.0584	1.2898	11.1936	0.275	14.291	12.8475	0.1735	0.4246	2.0288	97.6637	7.3369	0.6631	8	0.2837	0.0065	0.0344	0.1434	1.3835	3.1485	13	2.0343	0.1217	0.0327	2.1887	2	0.694726
10Ca82.	107	scan	47.9318	7.7827	0.1385	1.7332	11.7223	0.3151	12.6891	12.3858	0.3325	0.5675	2.0181	97.6165	7.1213	0.8787	8	0.4841	0.0155	0.0397	0.1938	1.4565	2.8105	13	1.9717	0.1635	0.063	2.1982	2	0.658659
10Ca82.	108	scan	51.4895	3.5409	0.1235	0.9183	10.7869	0.2428	15.1765	12.6097	0.112	0.3289	2.0365	97.3811	7.5807	0.4193	8	0.1951	0.0137	0.0303	0.1017	1.3282	3.331	13	1.9892	0.0939	0.021	2.105	2	0.71493
10Ca82.	109	scan	50.3578	4.6613	0.0801	2.3883	9.589	0.2841	15.0107	12.5439	0.1602	0.3532	2.0376	97.493	7.4101	0.5899	8	0.2184	0.0089	0.0354	0.2645	1.18	3.2928	13	1.9777	0.1008	0.0301	2.1101	2	0.736183
10Ca82.	110	scan	52.8929	2.1464	0.0517	1.961	9.8461	0.3125	15.9742	12.6516	0.0518	0.1321	2.0585	98.0855	7.7043	0.2957	8	0.0728	0.0057	0.0386	0.2149	1.1994	3.4687	13	1.9745	0.0373	0.0096	2.0218	2	0.743065
10Ca82.	111	scan	51.1451	3.6486	0.0551	1.0413	10.6994	0.1847	15.1882	12.7692	0.1144	0.2278	2.03	97.107	7.5541	0.4459	8	0.1892	0.0061	0.0231	0.1157	1.3216	3.3442	13	2.0208	0.0652	0.0216	2.1078	2	0.716747
10Ca82.	112	scan	50.9183	4.0094	0.0784	1.8649	9.9531	0.2841	15.3092	12.7062	0.1349	0.3397	2.041	97.6405	7.4801	0.5199	8	0.1743	0.0087	0.0354	0.2062	1.2228	3.3527	13	2	0.0968	0.0253	2.1221	2	0.732751
10Ca82.	113	scan	52.3902	2.4506	0.0434	2.415	9.0182	0.3215	16.1765	12.5873	0.0458	0.2157	2.054	97.7327	7.6475	0.3525	8	0.0691	0.0048	0.0398	0.2653	1.1009	3.5202	13	1.9687	0.061	0.0085	2.0391	2	0.761767
10Ca82.	114	scan	51.1515	3.9849	0.0818	2.1608	8.533	0.2712	15.9029	12.5551	0.106	0.275	2.0437	97.0656	7.5046	0.4954	8	0.1936	0.009	0.0337	0.2386	1.047	3.4782	13	1.9736	0.0782	0.0198	2.0717	2	0.768629
10Ca82.	116	scan	49.7032	5.3585	0.1301	2.1784	9.3765	0.3189	14.7802	12.4054	0.0964	0.5001	2.0274	96.875	7.3508	0.6492	8	0.2848	0.0145	0.04	0.2424	1.1597	3.2586	13	1.9658	0.1434	0.0182	2.1273	2	0.737523
10Ca82.	117	scan	49.9792	4.5819	0.1368	1.1405	9.8858	0.2996	14.9958	12.5929	0.0952	0.3356	2.0116	96.0549	7.4496	0.5504	8	0.2545	0.0153	0.0378	0.1279	1.2323	3.3321	13	2.0111	0.097	0.0181	2.1262	2	0.730019
10Ca82.	118	scan	54.6836	0.7369	0	0.8148	8.9541	0.2221	17.6109	12.8867	0	0.0728	2.078	98.0643	7.8904	0.1096	8	0.0157	0	0.0271	0.0885	1.0805	3.7882	13	1.9923	0.0204	0	2.0129	2	0.778072
10Ca82.	119	scan	51.6628	3.7166	0.0701	1.1104	10.1509	0.266	15.485	12.6642	0.0855	0.3168	2.0465	97.5748	7.5692	0.4308	8	0.2109	0.0077	0.033	0.1224	1.2438	3.3821	13	1.988	0.09	0.016	2.094	2	0.731123
10Ca82.	120	scan	52.0586	2.8739	0.0901	4.8436	6.6567	0.2182	16.7304	12.3186	0.0578	0.2386	2.0723	98.1766	7.532	0.468	8	0.0221	0.0098	0.0267	0.5274	0.8055	3.6086	13	1.9097	0.0669	0.0107	1.9883	2	0.817517
10Ca82.	121	scan	51.9666	3.8375	0.0901	0.1379	10.806	0.3319	15.4054	12.7888	0.1012	0.3141	2.0514	97.8308	7.5953	0.4047	8	0.2564	0.0099	0.0411	0.0152	1.3209	3.3566	13	2.0027	0.089	0.0189	2.1106	2	0.717606
10Ca82.	122	scan	52.1955	3.2593	0.0484	1.8303	8.6876	0.2647	16.1831	12.5047	0.0482	0.2494	2.0542	97.3253	7.6185	0.3815	8	0.1791	0.0053	0.0327	0.201	1.0605	3.5213	13	1.9556	0.0706	0.009	2.0351	2	0.768541
10Ca82.	123	scan	51.5173	3.4048	0.0601	3.1262	8.3101	0.2725	15.737	12.2501	0.0663	0.2238	2.0427	97.0108	7.5617	0.4383	8	0.1506	0.0066	0.0339	0.3453	1.0201	3.4435	13	1.9265	0.0637	0.0124	2.0026	2	0.771462
10Ca91.	8		55.7297	0.9428	0.015	1.16	10.213	0.1524	17.1333	12.9385	0.0422	0.1011	2.1204	100.549	7.8802	0.1198	8	0.0374	0.0016	0.0183	0.1234	1.2077	3.6116	13	1.9602	0.0277	0.0076	1.9956	2	0.749403
10Ca91.	38		55.2055	1.2678	0.01	1.4257	10.6237	0.2763	16.7254	13.0532	0.0385	0.1375	2.118	100.882	7.815	0.185	8	0.0265	0.0011	0.0331	0.1519	1.2577	3.5296	13	1.9799	0.0377	0.007	2.0246	2	0.737284
10Ca91.	40		54.8504	1.1885	0	3.2741	8.936	0.2815	16.999	12.8055	0.0084	0.0849	2.1166	100.545	7.7702	0.1984	7.9686	0	0	0.0338	0.349	1.0587	3.5899	13	1.9437	0.0233	0.0015	1.9685	2	0.772254
10Ca91.	41		55.2376	0.5649	0	1.976	10.023	0.2634	17.2312	13.1987	0.0181	0.058	2.1146	100.691	7.8323	0.0944	7.9267	0	0	0.0316	0.2108	1.1885	3.6423	13	2.0052	0.0159	0.0033	2.0247	2	0.753974
10Ca91.	42		55.8367	0.6613	0	2.0699	9.2502	0.2518	17.5048	12.9483	0.006	0.0566	2.1269	100.713	7.8713	0.1099	7.9811	0	0	0.0301	0.2196	1.0906	3.6787	13	1.9557	0.0155	0.0011	1.9723	2	0.771329
10Ca91.	43		55.4858	0.6821	0	2.0598	9.6697	0.235	17.2494	12.9888	0.0084	0.0634	2.1182	100.561	7.854	0.1138	7.9678	0	0	0.0282	0.2194	1.1447	3.6399	13	1.9699	0.0174	0.0015	1.9888	2	0.760753
10Ca91.	44		54.752	0.9315	0	3.0601	9.7345	0.2867	16.6707	12.8741	0.0169	0.0431	2.1078	100.477	7.7885	0.1562	7.9446	0	0	0.0345	0.3276	1.1581	3.5352	13	1.9622	0.0119	0.0031	1.9772	2	0.753244
10Ca91.	45		55.4259	0.7407	0	1.337	10.7112	0.2505	16.858	13.1344	0.0012	0.0283	2.1128	100.6	7.8656	0.1239	7.9895	0	0	0.0301	0.1428	1.2712	3.5664	13	1.9971	0.0078	0.0002	2.0051	2	0.737225
10Ca91.	46		55.1949	1.2055	0.025	1.9387	10.0205	0.2053	16.8182	12.8741	0.0084	0.1038	2.1154	100.51	7.8231	0.1769	8	0.0245	0.0027	0.0247	0.2068	1.1878	3.5536	13	1.9551	0.0285	0.0015	1.9852	2	0.749483
10Ca91.	47		54.5659	1.1677	0.1168	2.7837	9.4185	0.195	16.7386	12.695	0.0313	0.0836	2.1016	99.8976	7.7849	0.1963	7.9812	0	0.0125	0.0236	0.2989	1.1238	3.5601	13	1.9406	0.0231	0.0057	1.9694	2	0.760072
10Ca91.	66		54.7541	1.2546	0.0367	0.8065	12.1727	0.2789	15.9045	13.091	0.0663	0.1051	2.0987	100.569	7.8226	0.1774	8	0.0338	0.0039	0.0338	0.0867	1.4544	3.3874	13	2.0039	0.0291	0.0121	2.0451	2	0.699616
Proportion of cations is based on the sum of cations = 13 except for Ca, Na and K for estimation of Fe3+ and on 46 negative charges

## Sheet: Epidote
Epidote
Birchy Complex
Mafic rock	lab#	Comment	SiO2	Al2O3	Fe2O3	Mn2O3	TiO2	CaO	H2O*	sum	Si	Al	Ti	Mn3+	Fe3+	sum	Ca	OH	O*
10Ca47.	29	rim	36.8757	23.3859	13.7313	0.1609	0.0567	23.2044	1.8428	99.3211	3	2.2423	0.0035	0.01	0.8406	3.0986	2.0227	1	12.1742
10Ca47.	30	rim	37.2052	23.0515	14.6763	0.1624	<0.05	22.9008	1.8592	99.9477	3	2.1906	0.0021	0.01	0.8905	3.0965	1.9785	1	12.1238
10Ca47.	31	rim	37.3143	23.9962	12.7748	<0.14	0.0567	23.0729	1.8647	99.343	3	2.2738	0.0034	0.0066	0.7729	3.0595	1.9876	1	12.0851
10Ca47.	32	core	37.7571	26.1483	10.7145	0.1523	0.0884	23.2142	1.8868	99.9972	3	2.4486	0.0053	0.0092	0.6406	3.1049	1.9763	1	12.1374
10Ca47.	33	core	37.3357	25.9801	10.6945	0.171	0.0768	23.5389	1.8657	99.7052	3	2.4603	0.0046	0.0105	0.6467	3.1221	2.0265	1	12.2152
10Ca47.	34	core	37.5496	25.6797	11.3279	0.1652	0.0801	23.3975	1.8764	100.079	3	2.418	0.0048	0.01	0.6811	3.1139	2.0029	1	12.1764
10Ca47.	51	scan	37.3122	23.9641	13.0421	0.1753	<0.05	23.0869	1.8646	99.5228	3	2.2708	0.001	0.0107	0.7891	3.0757	1.9889	1	12.1027
10Ca47.	52	scan	37.218	23.7581	12.8849	<0.14	<0.05	22.9358	1.8599	98.821	3	2.257	0.002	0.0066	0.7816	3.048	1.9809	1	12.0543
10Ca47.	53	scan	37.0383	23.6882	12.8763	0.1351	<0.05	23.3136	1.8509	98.9707	3	2.2613	0.0022	0.0083	0.7848	3.0579	2.0233	1	12.1118
10Ca47.	54	scan	37.2266	23.8413	13.198	<0.14	<0.05	23.0211	1.8603	99.3488	3	2.2644	0.0024	0.0074	0.8004	3.0746	1.9878	1	12.1036
10Ca47.	55	scan	37.8641	25.6514	10.9919	0.1595	0.0667	23.2016	1.8921	99.8438	3	2.3953	0.004	0.0096	0.6554	3.0656	1.9696	1	12.0696
10Ca47.	56	scan	37.9347	26.2503	10.4858	0.1466	0.1185	23.6158	1.8957	100.473	3	2.4467	0.007	0.0088	0.624	3.0889	2.0011	1	12.137
10Ca47.	57	scan	37.9411	26.9343	9.6165	0.1466	0.1201	23.6004	1.896	100.278	3	2.51	0.0071	0.0088	0.5722	3.0991	1.9994	1	12.1523
10Ca47.	58	scan	38.4695	26.9853	9.342	<0.14	0.1385	23.3779	1.9224	100.396	3	2.4802	0.0081	0.008	0.5482	3.0473	1.9534	1	12.0271
10Ca47.	59	scan	37.9561	26.5678	9.2762	<0.14	0.1034	23.5235	1.8967	99.4511	3	2.4749	0.0062	0.0069	0.5517	3.0399	1.9921	1	12.0557
10Ca47.	60	scan	37.8834	26.6528	9.5836	<0.14	0.1368	23.4045	1.8931	99.7151	3	2.4875	0.0082	0.0074	0.5711	3.0774	1.9858	1	12.105
10Ca47.	61	scan	37.7636	26.717	9.6093	0.1609	0.1618	23.3961	1.8871	99.7614	3	2.5015	0.0097	0.0097	0.5745	3.0953	1.9914	1	12.1433
10Ca47.	62	scan	38.0138	26.5904	9.8066	0.1796	0.1502	23.2212	1.8996	99.9277	3	2.4732	0.0089	0.0108	0.5824	3.08	1.9635	1	12.0866
10Ca47.	63	scan	38.0438	26.7284	9.5393	0.1767	0.1368	23.655	1.9011	100.213	3	2.4841	0.0081	0.0106	0.5661	3.0712	1.9986	1	12.1088
10Ca47.	64	scan	38.2235	26.872	9.2776	0.1638	0.1402	23.2912	1.9101	99.9516	3	2.4857	0.0083	0.0098	0.548	3.0579	1.9586	1	12.0472
10Ca47.	65	scan	38.2214	26.4355	9.931	0.1854	0.1085	23.4787	1.91	100.341	3	2.4454	0.0064	0.0111	0.5866	3.0534	1.9745	1	12.0585
10Ca47.	66	scan	37.8812	26.2106	10.2942	0.1969	0.1218	23.287	1.893	99.9145	3	2.4464	0.0073	0.0119	0.6135	3.0826	1.976	1	12.1017
10Ca47.	67	scan	37.6908	24.4931	12.5517	0.194	0.1552	23.1877	1.8835	100.164	3	2.2977	0.0093	0.0118	0.7518	3.0715	1.9775	1	12.0889
10Ca47.	68	scan	37.7571	24.0831	12.8906	<0.14	0.1335	23.1499	1.8868	100.033	3	2.2552	0.008	0.0057	0.7707	3.0399	1.9708	1	12.0369
10Ca47.	69	scan	37.3721	23.5635	13.411	0.148	0.1034	23.0337	1.8676	99.5302	3	2.2293	0.0062	0.009	0.8101	3.0547	1.9811	1	12.0678
16Ca107.	146		36.8372	27.0666	8.7243	0.2457	0.0801	24.2245	1.8408	97.1904	3	2.5979	0.0049	0.0152	0.5347	3.1527	2.1138	1	12.3469
16Ca107.	147		36.6725	27.7468	8.0966	0.2514	0.0701	24.2161	1.8326	97.0583	3	2.6752	0.0043	0.0157	0.4984	3.1936	2.1225	1	12.4187
16Ca107.	151		36.9057	26.9494	8.73	0.1494	0.1151	24.384	1.8443	97.2409	3	2.5819	0.007	0.0092	0.534	3.1322	2.1238	1	12.3356
16Ca107.	152		36.957	27.4369	8.3712	0.204	0.0551	24.1979	1.8468	97.2341	3	2.6249	0.0034	0.0126	0.5114	3.1522	2.1046	1	12.3407
16Ca107.	153		36.5976	26.8247	9.3134	0.204	0.0901	23.9124	1.8289	96.9505	3	2.5915	0.0056	0.0127	0.5745	3.1854	2.1002	1	12.3808
16Ca107.	98		38.3369	26.1804	9.8881	0.1897	0.0551	23.7543	1.9158	98.7044	3	2.4146	0.0032	0.0113	0.5823	3.0427	1.9917	1	12.0491
16Ca107.	8		37.4854	27.1365	8.7429	0.1911	0.1285	24.4651	1.8732	98.2398	3	2.5596	0.0077	0.0116	0.5265	3.1055	2.0979	1	12.2685
16Ca107.	7		36.649	26.9778	8.6557	0.2055	0.1318	24.1335	1.8314	96.8272	3	2.6027	0.0081	0.0128	0.5332	3.1618	2.1167	1	12.3706
16Ca107.	8		36.2082	26.6188	8.9645	<0.14	0.1301	24.0678	1.8094	96.093	3	2.5993	0.0081	0.0058	0.5589	3.1736	2.1366	1	12.4098
16Ca107.	9		36.7281	26.9967	9.1489	0.2457	0.1268	24.4413	1.8354	97.8051	3	2.5989	0.0078	0.0153	0.5624	3.1843	2.1391	1	12.4355
16Ca107.	10		36.5099	26.547	9.1747	0.2083	0.1268	23.9866	1.8245	96.6659	3	2.5709	0.0078	0.013	0.5673	3.1639	2.1118	1	12.3683
16Ca107.	35		37.064	26.7038	9.0632	0.2155	0.1301	23.9922	1.8522	97.2076	3	2.5474	0.0079	0.0133	0.552	3.1206	2.0807	1	12.2765
Mafic rock	lab#	Comment	SiO2	Al2O3	Fe2O3	Mn2O3	TiO2	CaO	H2O*	sum	Si	Al	Ti	Mn3+	Fe3+	sum	Ca	OH	O*
11Ca105.	8		37.4983	24.1285	12.1157	<0.14	0.0717	22.4643	1.8739	98.2599	3	2.2751	0.0043	0.0024	0.7294	3.0128	1.9256	1	11.949
11Ca105.	9	core	37.3913	23.9641	12.2272	<0.14	0.0651	22.1424	1.8685	97.7464	3	2.266	0.0039	0.002	0.7382	3.0168	1.9035	1	11.9273
11Ca105.	10	rim	37.5068	24.3646	12.6361	<0.14	0.0818	22.4853	1.8743	99.0412	3	2.2968	0.0049	0.0032	0.7606	3.0691	1.927	1	12.032
11Ca105.	11	core	37.2993	24.7255	11.7096	<0.14	0.0801	22.4181	1.8639	98.2788	3	2.3438	0.0048	0.0067	0.7087	3.0645	1.9319	1	12.035
11Ca105.	12	core	37.5026	24.3098	12.19	0.1494	0.0834	22.8518	1.8741	98.9689	3	2.2919	0.005	0.0091	0.7338	3.04	1.9586	1	12.0214
11Ca105.	13	rim	37.2694	22.8568	14.2074	0.2515	<0.05	22.5846	1.8624	99.1399	3	2.1684	0.0022	0.0154	0.8606	3.0466	1.9478	1	12.0235
11Ca105.	14	core	37.0062	22.6906	13.9557	0.2385	0.0501	22.5468	1.8493	98.3732	3	2.1679	0.0031	0.0147	0.8514	3.0371	1.9584	1	12.018
11Ca105.	15	rim	37.4063	22.7567	14.043	0.181	0.0801	23.0114	1.8693	99.3501	3	2.151	0.0048	0.0111	0.8475	3.0144	1.9774	1	12.0016
11Ca105.	38		37.9133	24.6103	11.4794	<0.14	0.0968	22.933	1.8946	98.9587	3	2.2951	0.0058	0.0012	0.6835	2.986	1.9443	1	11.9263
11Ca105.	39		37.5796	23.0042	13.87	0.24	<0.05	22.8197	1.8779	99.4459	3	2.1644	0.0008	0.0146	0.8332	3.0142	1.9519	1	11.9745
11Ca105.	40	rim	37.3164	22.6263	14.2617	<0.14	<0.05	23.0939	1.8648	99.328	3	2.1438	0.0026	0.0068	0.8628	3.016	1.9893	1	12.0152
11Ca105.	41	rim	37.7293	22.8398	13.7284	0.3219	0.0617	22.6993	1.8854	99.3797	3	2.1404	0.0037	0.0195	0.8214	2.9858	1.9339	1	11.9195
16Ca70.	41		37.6716	24.4062	11.6824	<0.14	0.0717	22.8113	1.8825	96.6929	3	2.2907	0.0043	0.0016	0.7001	2.9972	1.9464	1	11.9456
16Ca70.	49		37.6502	24.3495	11.6224	<0.14	0.0868	22.8309	1.8815	96.6444	3	2.2867	0.0052	0.002	0.6969	2.9959	1.9492	1	11.9447
16Ca70.	50		37.6138	23.9754	12.3072	0.2773	0.0717	22.6588	1.8796	96.9824	3	2.2537	0.0043	0.0168	0.7387	3.0137	1.9363	1	11.9621
16Ca70.	51		37.7422	22.7435	13.8871	0.2802	0.0501	22.9512	1.8861	97.7236	3	2.1306	0.003	0.017	0.8307	2.9822	1.9547	1	11.9317
16Ca70.	52		36.2189	22.6377	11.7825	0.5316	0.0517	21.2386	1.8099	92.7075	3	2.2099	0.0032	0.0335	0.7344	2.9919	1.8849	1	11.8785
16Ca70.	73		37.31	23.0288	13.97	0.2658	0.2002	22.884	1.8645	97.6807	3	2.1823	0.0121	0.0163	0.8453	3.056	1.9715	1	12.0628
16Ca70.	74		37.3464	23.3405	12.4945	0.2471	0.0717	22.1956	1.8663	95.7714	3	2.2097	0.0043	0.0151	0.7553	2.9896	1.9104	1	11.8969
16Ca70.	75		37.4191	23.2612	13.5997	0.398	0.0818	22.6252	1.8699	97.495	3	2.1979	0.0049	0.0243	0.8205	3.05	1.9435	1	12.025
16Ca71.	38		36.8329	23.2026	12.9721	0.2213	<0.05	22.6084	1.8406	95.8565	3	2.2273	0	0.0137	0.7951	3.0361	1.973	1	12.0396
16Ca71.	49		35.6477	23.932	13.0264	0.4512	0.0484	22.7007	1.7814	95.8546	3	2.3737	0.0031	0.0289	0.825	3.2306	2.0469	1	12.397
16Ca71.	60		36.8415	24.3457	12.7476	0.3894	0.0768	22.8197	1.8411	97.223	3	2.3365	0.0047	0.0241	0.7811	3.1465	1.991	1	12.2141
16Ca71.	61		36.8137	23.5333	13.2523	0.2227	<0.05	23.3178	1.8397	97.1819	3	2.2602	0.0013	0.0138	0.8127	3.088	2.036	1	12.1708
16Ca71.	62		36.0735	23.1119	12.516	0.3333	0.2019	21.864	1.8027	94.1408	3	2.2653	0.0126	0.0211	0.7833	3.0842	1.9482	1	12.0901
16Ca72.	24		37.1153	23.11	13.6083	0.3851	<0.05	21.9158	1.8547	98.108	3	2.2015	0.0025	0.0237	0.8277	3.0579	1.898	1	11.9889
16Ca72.	38		37.0062	23.9584	12.9935	0.2989	0.0517	22.3355	1.8493	98.5152	3	2.2891	0.0032	0.0184	0.7927	3.1051	1.9401	1	12.0987
16Ca72.	39		37.4277	23.5994	13.1551	0.3391	0.0484	22.197	1.8703	98.727	3	2.2294	0.0029	0.0207	0.7935	3.0485	1.9063	1	11.9832
16Ca72.	40		35.1536	23.4709	14.4104	0.3894	0.1085	21.8514	1.7567	97.2268	3	2.3607	0.007	0.0253	0.9254	3.3215	1.998	1	12.4858
16Ca74.	5		37.1453	23.5012	12.6804	0.3247	<0.05	22.8295	1.8562	96.5442	3	2.237	0.002	0.02	0.7707	3.0332	1.9755	1	12.0246
16Ca74.	18		36.9014	23.401	12.649	0.1609	0.0834	22.9022	1.844	96.144	3	2.2422	0.0051	0.01	0.7738	3.0339	1.9949	1	12.0481
16Ca74.	20		36.9527	23.3632	12.4574	0.2946	0.0534	22.9652	1.8466	96.2113	3	2.2354	0.0033	0.0182	0.7611	3.021	1.9976	1	12.0344
16Ca74.	21		35.682	22.5867	12.4474	0.3233	0.8559	21.3645	1.7831	93.3457	3	2.2381	0.0541	0.0207	0.7875	3.1021	1.9246	1	12.1077
16Ca74.	24		37.2052	23.2366	12.5289	0.1968	0.0484	23.0841	1.8592	96.3185	3	2.2082	0.0029	0.0121	0.7602	2.9853	1.9944	1	11.9731
16Ca74.	47		36.987	22.8115	12.6804	0.2026	0.0517	22.975	1.8483	95.7925	3	2.1806	0.0032	0.0125	0.774	2.9703	1.9966	1	11.9586
16Ca74.	48		37.0383	22.3278	14.1902	0.2055	0.0534	22.7819	1.8509	96.6433	3	2.1314	0.0033	0.0127	0.8649	3.0157	1.9771	1	12.0015
16Ca74.	49		36.9848	23.7713	11.8655	0.1652	<0.05	23.3584	1.8482	96.2207	3	2.2725	0.0025	0.0102	0.7243	3.0095	2.0301	1	12.0474
16Ca74.	50		37.3442	23.5049	12.739	0.2831	0.0567	22.6154	1.8662	96.5691	3	2.2254	0.0034	0.0173	0.7701	3.0181	1.9466	1	11.9753
16Ca74.	51		36.3623	22.273	14.0172	0.2486	0.0517	22.5706	1.8171	95.5978	3	2.1657	0.0032	0.0156	0.8703	3.0601	1.9952	1	12.086
16Ca74.	59		36.7559	22.6566	13.0221	0.1537	0.0501	22.8462	1.8368	95.5321	3	2.1794	0.0031	0.0096	0.7998	2.9931	1.9979	1	11.9899
BVOT and cover units
Mafic rock	lab#	Comment	SiO2	Al2O3	Fe2O3	Mn2O3	TiO2	CaO	H2O*	sum	Si	Al	Ti	Mn3+	Fe3+	sum	Ca	OH	O*
10Ca68.	43		38.7904	25.2735	2.6808	0.2256	0.045	22.656	1.9384	96.1739	3	2.3037	0.0026	0.0133	0.156	2.9947	1.8774	1	11.6158
10Ca68.	59		39.0086	29.5701	6.2022	<0.14	0.0601	24.3658	1.9493	101.228	3	2.6802	0.0035	0	0.3589	3.0506	2.0078	1	12.0815
10Ca68.	61		38.5166	28.6764	7.2445	<0.14	0.0768	23.8061	1.9247	100.572	3	2.6324	0.0045	0.0039	0.4246	3.0928	1.9867	1	12.1159
10Ca73.	2	core	37.2608	24.9012	11.8855	0.4368	0.0701	22.8281	1.862	99.3608	3	2.3629	0.0042	0.0268	0.7201	3.1234	1.9693	1	12.1547
10Ca73.	9	core	37.601	24.0038	12.4888	<0.14	0.2319	23.683	1.879	100.042	3	2.2571	0.0139	0.0035	0.7498	3.0297	2.0246	1	12.0754
10Ca73.	10	rim	37.7336	24.5611	12.3744	<0.14	0.2753	23.4563	1.8856	100.451	3	2.3014	0.0165	0.0052	0.7403	3.0684	1.9981	1	12.1088
10Ca73.	11	core	38.0887	24.2097	11.4551	<0.14	0.1602	23.2254	1.9034	99.1898	3	2.2473	0.0095	0.0023	0.679	2.944	1.96	1	11.8801
10Ca73.	12	rim	37.5346	23.3217	13.5383	0.148	<0.05	23.4577	1.8757	99.9491	3	2.1969	0.0025	0.009	0.8143	3.0232	2.0089	1	12.046
10Ca73.	13		37.064	22.0425	14.8222	<0.14	0.1602	23.2086	1.8522	99.3136	3	2.1027	0.0098	0.0067	0.9028	3.0246	2.0128	1	12.0552
10Ca73.	26	core	39.0429	20.5989	14.1774	<0.14	0.0834	21.927	1.951	99.6112	3	1.8654	0.0048	0.0058	0.8198	2.8852	1.8052	1	11.5466
10Ca73.	31	core	37.3785	22.1729	14.7893	<0.14	<0.05	23.0393	1.8679	99.4387	3	2.0974	0.0026	0.0065	0.8932	3.0025	1.9813	1	11.9861
10Ca73.	32	rim	36.7602	22.239	15.2482	<0.14	0.0617	23.238	1.837	99.3971	3	2.139	0.0038	0	0.9364	3.0807	2.032	1	12.1543
10Ca73.	33	core	37.4041	21.5531	15.2682	<0.14	0.0601	22.8532	1.8692	99.5603	3	2.0374	0.0036	0.0068	0.9215	3.0114	1.9639	1	11.9686
10Ca73.	34	rim	37.5881	22.4374	14.8765	<0.14	0.0334	23.1107	1.8784	100.223	3	2.1106	0.002	0.0052	0.8935	3.0341	1.9763	1	12.0185
10Ca73.	35	core	38.7434	20.5328	13.9443	<0.14	<0.05	21.7059	1.9361	99.1081	3	1.8738	0.0029	0.0051	0.8125	2.9348	1.8008	1	11.5859
10Ca73.	36	rim	38.2	22.1653	13.88	<0.14	0.0551	22.8141	1.9089	99.7799	3	2.0516	0.0033	0.0046	0.8203	2.954	1.9197	1	11.8177
10Ca75.	34		38.0032	24.8937	10.7946	<0.14	0.0684	23.2758	1.8991	99.1372	3	2.316	0.0041	0.0078	0.6412	2.9717	1.9687	1	11.9289
10Ca75.	35		38.0524	25.7477	10.2856	<0.14	<0.05	23.231	1.9016	99.4195	3	2.3924	0.0024	0.0077	0.6102	3.0152	1.9624	1	11.9856
10Ca75.	36		38.0074	25.0713	10.8518	0.194	<0.05	22.9596	1.8993	99.0392	3	2.3323	0.0017	0.0117	0.6446	2.9902	1.9417	1	11.9298
10Ca75.	41		37.5689	24.6934	10.6688	0.1868	0.0501	22.8826	1.8774	97.9424	3	2.324	0.003	0.0114	0.6411	2.9794	1.9578	1	11.9289
10Ca75.	42		38.2642	24.3722	11.6682	0.1897	0.0517	22.593	1.9121	99.0765	3	2.2521	0.0031	0.0113	0.6884	2.9572	1.8979	1	11.8342
10Ca75.	43		38.1636	25.3131	10.4	<0.14	0.0868	22.9932	1.9071	98.9925	3	2.3452	0.0051	0.0071	0.6152	2.9728	1.9366	1	11.8986
10Ca75.	46		37.663	24.8276	10.7074	0.1437	0.0484	22.9708	1.8821	98.2686	3	2.3308	0.0029	0.0087	0.6418	2.9859	1.9604	1	11.9408
10Ca75.	47		39.6269	23.025	11.7611	0.1724	0.0551	21.8584	1.9802	98.5132	3	2.0544	0.0031	0.0099	0.67	2.7384	1.7731	1	11.3829
10Ca75.	48		37.9668	24.4213	10.846	<0.14	0.0784	23.1205	1.8973	98.4508	3	2.2743	0.0047	0.0048	0.6449	2.9286	1.9574	1	11.8552
10Ca75.	49		37.7443	24.9239	10.3499	0.1624	0.0684	22.8127	1.8862	98.0154	3	2.3348	0.0041	0.0098	0.619	2.9693	1.9428	1	11.902
10Ca75.	50		37.9497	24.9863	10.5987	0.1509	0.0567	23.2408	1.8964	98.916	3	2.3279	0.0034	0.0091	0.6305	2.9736	1.9685	1	11.9299
10Ca75.	51		39.4429	24.2796	11.0176	<0.14	<0.05	22.4978	1.971	99.3824	3	2.1765	0.0021	0.0052	0.6306	2.8146	1.8334	1	11.559
10Ca75.	52		38.5936	24.6537	10.7331	<0.14	0.0717	22.9344	1.9286	98.9667	3	2.2586	0.0042	0.003	0.6278	2.8936	1.9101	1	11.7528
10Ca75.	53		38.0331	25.504	9.7022	<0.14	0.0884	23.2688	1.9006	98.5238	3	2.371	0.0052	0.0014	0.5759	2.9535	1.9666	1	11.8996
10Ca75.	54		38.0973	25.6211	9.5521	0.1595	0.0517	23.2086	1.9038	98.6495	3	2.3778	0.0031	0.0096	0.566	2.961	1.9582	1	11.8999
10Ca75.	55		38.3626	25.5399	10.1612	0.2328	0.0534	23.1233	1.9171	99.4099	3	2.3539	0.0031	0.0139	0.598	2.9694	1.9375	1	11.8941
10Ca75.	56		37.7036	24.6858	10.074	0.2213	0.0601	21.9787	1.8841	97.0286	3	2.315	0.0036	0.0134	0.6032	2.9774	1.8738	1	11.8237
10Ca75.	57		38.2984	25.9934	9.5764	0.1581	0.0634	23.343	1.9138	99.3663	3	2.3997	0.0037	0.0094	0.5645	2.9797	1.9592	1	11.9294
10Ca75.	58		38.1123	25.8403	9.5779	0.2917	<0.05	22.8826	1.9045	98.6743	3	2.3972	0.002	0.0175	0.5673	2.9868	1.9299	1	11.9101
10Ca75.	59		39.4707	26.7605	9.7108	<0.14	0.0517	23.0715	1.9724	101.165	3	2.3972	0.003	0.0047	0.5554	2.9645	1.8789	1	11.8254
10Ca75.	60		36.281	24.3911	9.6408	<0.14	0.0951	22.0627	1.813	94.4851	3	2.377	0.0059	0.0076	0.5999	2.9949	1.9547	1	11.95
10Ca75.	66		38.185	25.1563	10.4657	0.1581	0.0567	22.8448	1.9082	98.957	3	2.3293	0.0034	0.0095	0.6188	2.9795	1.923	1	11.8859
10Ca75.	149		37.1624	24.888	11.2492	<0.14	0.0517	23.6732	1.8571	99.0451	3	2.3679	0.0031	0.0075	0.6834	3.0627	2.0476	1	12.1452
10Ca79.	7	core	38.2021	28.2229	7.4232	<0.14	0.0651	24.0356	1.909	99.9749	3	2.6121	0.0038	0.0048	0.4387	3.0637	2.0224	1	12.1177
10Ca79.	9	rim	38.3925	27.4086	8.8001	<0.14	0.0567	23.9027	1.9185	100.553	3	2.5242	0.0033	0.0023	0.5175	3.0473	2.0012	1	12.0764
10Ca79.	10	core	39.0407	22.9664	13.0135	0.1308	0.0918	22.9582	1.9509	100.223	3	2.0799	0.0053	0.0076	0.7525	2.8526	1.8902	1	11.6688
10Ca79.	11	rim	37.5796	26.4714	7.8107	<0.14	0.1585	24.0006	1.8779	97.9844	3	2.4906	0.0095	0.0018	0.4692	2.9765	2.0529	1	12.0203
10Ca79.	29	core	37.8234	24.17	12.9578	0.2141	0.0551	23.2352	1.8901	100.348	3	2.2594	0.0033	0.0129	0.7734	3.049	1.9746	1	12.05
10Ca79.	30	rim	38.1508	24.6518	12.1114	<0.14	0.0784	23.6592	1.9065	100.611	3	2.2847	0.0046	0	0.7167	3.006	1.9934	1	12.0081
10Ca79.	34		38.5572	27.794	7.8093	<0.14	<0.05	24.363	1.9268	100.637	3	2.5487	0.0024	0.0042	0.4572	3.0191	2.031	1	12.0587
10Ca79.	35	rim	38.0374	23.2536	13.6912	<0.14	0.0868	23.69	1.9008	100.717	3	2.1615	0.0051	0.0024	0.8126	2.9821	2.0019	1	11.9783
10Ca79.	36	rim	37.8128	23.709	13.1837	<0.14	<0.05	23.7837	1.8896	100.612	3	2.2169	0.002	0.0072	0.7871	3.0158	2.0218	1	12.0492
10Ca79.	51	core	38.1422	27.4993	8.3211	0.1581	<0.05	24.2007	1.906	100.307	3	2.5491	0.002	0.0095	0.4925	3.0585	2.0395	1	12.1255
10Ca79.	52	core	37.0212	24.6046	11.4594	0.1351	<0.05	23.8075	1.85	98.9976	3	2.3499	0.0024	0.0083	0.6988	3.0654	2.0671	1	12.1653
10Ca80.	10	rim	37.7785	22.9797	14.4204	0.6365	0.0768	23.0295	1.8879	100.837	3	2.1507	0.0046	0.0385	0.8617	3.0586	1.9595	1	12.0482
10Ca80.	13	rim	37.3335	22.6226	14.3218	0.2414	0.1335	23.3709	1.8656	99.9747	3	2.1425	0.0081	0.0148	0.866	3.0359	2.0122	1	12.0698
10Ca80.	14	core	37.3849	23.0326	14.409	0.2357	<0.05	23.3724	1.8682	100.378	3	2.1783	0.0026	0.0144	0.8701	3.0659	2.0096	1	12.1113
10Ca80.	26	rim	37.6181	23.3878	13.8499	0.4023	0.0551	23.0617	1.8798	100.285	3	2.1982	0.0033	0.0244	0.8312	3.0603	1.9706	1	12.0612
10Ca80.	27	core	37.3314	23.231	14.246	0.3678	0.1418	23.2954	1.8655	100.514	3	2.2002	0.0086	0.0225	0.8615	3.094	2.0058	1	12.1523
10Ca80.	30	rim	38.17	22.7907	14.6563	0.2586	<0.05	22.7693	1.9074	100.686	3	2.1111	0.0009	0.0155	0.8668	2.9976	1.9174	1	11.9194
10Ca80.	31	core	37.4919	22.8058	14.2703	0.6078	<0.05	22.9288	1.8735	100.07	3	2.1507	0.0028	0.037	0.8593	3.0516	1.9658	1	12.045
10Ca80.	35	core	37.6694	22.53	14.8779	0.3118	0.0734	23.2408	1.8824	100.614	3	2.1147	0.0044	0.0189	0.8916	3.033	1.9832	1	12.0332
10Ca80.	36	rim	37.7422	23.1988	14.4247	0.2946	<0.05	22.9694	1.886	100.568	3	2.1733	0.0016	0.0178	0.8628	3.0579	1.9562	1	12.043
10Ca80.	39	rim	37.6566	23.1233	13.5297	0.5058	0.1452	22.9386	1.8818	99.8411	3	2.1711	0.0087	0.0307	0.8111	3.0234	1.958	1	11.9982
10Ca80.	40	core	37.8363	23.2555	13.6941	0.4929	<0.05	23.0561	1.8908	100.263	3	2.1732	0.0014	0.0297	0.8171	3.0214	1.9587	1	11.992
10Ca80.	53	core	37.4876	22.2711	15.3054	0.3003	<0.05	22.9134	1.8733	100.178	3	2.1005	0.0006	0.0183	0.9217	3.0412	1.9647	1	12.0277
10Ca80.	54	rim	37.6202	23.4369	13.5997	0.3075	<0.05	23.0631	1.88	100.002	3	2.2027	0.0024	0.0187	0.8161	3.044	1.9706	1	12.0373
10Ca82.	2	core	38.108	28.393	6.7384	<0.14	0.3571	24.1839	1.9043	99.8054	3	2.6343	0.0211	0.0033	0.3992	3.0636	2.0399	1	12.1439
10Ca82.	3	rim	39.3745	27.076	7.1187	<0.14	0.1185	23.4409	1.9676	100.508	3	2.4313	0.0068	0.0033	0.4082	2.9963	1.9136	1	11.8422
10Ca82.	8		38.2599	28.9409	6.2251	0.2515	<0.05	24.0034	1.9119	99.6129	3	2.6745	0.0008	0.015	0.3673	3.0576	2.0166	1	12.1037
10Ca82.	9		37.8299	28.8729	6.5497	0.1911	<0.05	23.8117	1.8904	99.1886	3	2.6986	0.0015	0.0115	0.3909	3.1025	2.0233	1	12.1788
10Ca82.	10		38.1144	28.7595	6.7198	0.2443	<0.05	23.6592	1.9047	99.4341	3	2.6679	0.0012	0.0146	0.398	3.0817	1.9953	1	12.1189
10Ca82.	11		38.3775	28.5271	6.93	<0.14	<0.05	23.9306	1.9178	99.8063	3	2.6282	0.0011	0.0059	0.4077	3.043	2.0043	1	12.0696
10Ca82.	12		37.9925	28.3514	6.8714	<0.14	<0.05	24.3056	1.8986	99.5788	3	2.6385	0.0018	0.005	0.4083	3.0542	2.0564	1	12.14
10Ca82.	13		38.2342	28.5082	6.8042	<0.14	<0.05	24.3028	1.9106	99.8412	3	2.6363	0.0009	0.0039	0.4018	3.0429	2.0431	1	12.1079
10Ca82.	14		38.1615	28.3193	7.0844	0.1408	<0.05	24.1013	1.907	99.7583	3	2.6238	0.0017	0.0084	0.4191	3.053	2.0301	1	12.1112
10Ca82.	15		38.1743	28.4572	6.674	<0.14	<0.05	24.058	1.9076	99.3343	3	2.6357	0.0023	0.0009	0.3947	3.0336	2.0257	1	12.0776
10Ca82.	16		38.262	28.6348	6.7255	0.2242	<0.05	23.9166	1.912	99.7093	3	2.6461	0.0011	0.0134	0.3968	3.058	2.0092	1	12.0969
10Ca82.	17		38.2877	28.9012	6.5325	0.1437	<0.05	24.0678	1.9133	99.8699	3	2.6689	0.0011	0.0086	0.3852	3.0637	2.0206	1	12.1171
10Ca82.	40		37.6823	27.6788	6.9386	<0.14	0.1752	24.4497	1.8831	98.8893	3	2.5971	0.0105	0.0013	0.4157	3.0283	2.0856	1	12.1329
10Ca82.	66	core	37.8876	27.9074	7.4204	<0.14	0.0717	23.564	1.8933	99.2876	3	2.6043	0.0043	0.0043	0.4421	3.1072	1.9992	1	12.1379
10Ca82.	67	rim	37.2373	28.3212	6.7212	0.1581	0.0734	23.8425	1.8608	98.2797	3	2.6891	0.0044	0.0097	0.4075	3.1143	2.0581	1	12.2323
10Ca82.	79		37.171	28.0642	7.2259	<0.14	0.0918	23.9362	1.8575	98.4335	3	2.6695	0.0056	0.0051	0.4389	3.119	2.0699	1	12.2514
10Ca82.	80		37.3763	27.5559	7.5605	<0.14	0.04	24.037	1.8678	98.6077	3	2.6067	0.0024	0.0051	0.4567	3.0778	2.0672	1	12.1828
10Ca82.	81		37.1496	28.0623	7.0401	0.1336	0.0834	23.9614	1.8564	98.3159	3	2.6708	0.0051	0.0082	0.4278	3.1125	2.0733	1	12.2455
10Ca84.	61	core	37.1902	22.734	14.6349	0.2213	<0.05	23.1988	1.8585	99.9128	3	2.1613	0.0014	0.0136	0.8884	3.0671	2.0051	1	12.1068
10Ca84.	63	core	36.6404	21.8328	15.893	<0.14	<0.05	23.2814	1.831	99.7286	3	2.1068	0.0008	0.0052	0.9792	3.1064	2.0424	1	12.197
10Ca84.	64	rim	37.9946	22.53	15.4856	0.1724	<0.05	22.6685	1.8987	101.073	3	2.0966	0	0.0104	0.9201	3.0351	1.9178	1	11.9797
10Ca84.	65	core	36.8458	22.5564	15.1153	<0.14	<0.05	23.1219	1.8413	99.5845	3	2.1645	0.0002	0.0062	0.9261	3.0971	2.0171	1	12.1628
10Ca84.	66	rim	37.156	22.6131	14.7678	0.2313	<0.05	23.1569	1.8568	99.8002	3	2.1518	0.0006	0.0142	0.8973	3.0649	2.0033	1	12.1005
10Ca84.	67	core	38.0395	22.324	14.9537	0.2443	<0.05	23.003	1.9009	100.514	3	2.075	0.0012	0.0147	0.8875	2.9812	1.9438	1	11.9149
10Ca84.	68	core	36.8479	22.205	15.0238	0.2242	<0.05	23.0267	1.8414	99.3008	3	2.1307	0.001	0.0139	0.9205	3.0769	2.0087	1	12.1212
10Ca84.	69	core	37.171	22.2333	14.5948	0.3176	<0.05	22.8099	1.8575	99.0496	3	2.1148	0.0011	0.0195	0.8864	3.0219	1.9725	1	12.0093
10Ca84.	77	core	37.3977	22.4582	14.7135	0.2026	<0.05	23.1723	1.8688	99.8745	3	2.1233	0.0013	0.0124	0.8882	3.0283	1.9917	1	12.0339
10Ca91.	3		38.8696	24.0415	11.2678	<0.14	<0.05	22.9806	1.9424	99.6628	3	2.1869	0.0021	0.0076	0.6544	2.8515	1.9004	1	11.7076
10Ca91.	4		38.2834	26.3788	8.9759	<0.14	<0.05	24.1923	1.9131	99.9854	3	2.4362	0.0008	0.0065	0.5293	2.9763	2.0312	1	12.001
10Ca91.	5		38.707	24.4988	11.0605	<0.14	<0.05	23.0463	1.9343	99.8486	3	2.2379	0.0018	0.007	0.6451	2.8962	1.9138	1	11.7871
10Ca91.	6		39.306	25.9971	9.2948	<0.14	<0.05	23.0365	1.9642	100.247	3	2.3385	0.0013	0.0062	0.5339	2.8816	1.8839	1	11.7422
10Ca91.	25		37.9347	25.708	10.094	<0.14	0.0567	23.6368	1.8957	99.4251	3	2.3961	0.0034	0.0032	0.6007	3.0069	2.0028	1	12.0144
10Ca91.	26		38.2877	26.6887	8.8516	<0.14	<0.05	23.8859	1.9133	99.7844	3	2.4646	0.0009	0.0026	0.5219	2.9998	2.0053	1	12.0013
10Ca91.	27		39.5841	24.5026	10.297	<0.14	<0.05	22.8672	1.9781	99.9736	3	2.1886	0.0011	0.0026	0.5873	2.7796	1.8569	1	11.5766
10Ca91.	28		37.5817	24.2607	11.1692	<0.14	<0.05	23.5025	1.878	98.4923	3	2.2825	0.0017	0.0032	0.6709	2.9591	2.0102	1	11.9499
10Ca91.	29		38.3925	26.4601	8.6357	<0.14	<0.05	24.0859	1.9186	99.6937	3	2.4368	0.001	0.0035	0.5078	2.9516	2.0166	1	11.9511
10Ca91.	30		38.8696	30.8493	3.1626	<0.14	<0.05	24.4511	1.9424	99.4258	3	2.8062	0.0024	0.0033	0.1837	2.9994	2.022	1	12.0218
10Ca91.	31		39.4643	28.6178	5.6646	<0.14	0.0751	24.0985	1.9721	100.23	3	2.5639	0.0043	0.0045	0.324	2.9015	1.9628	1	11.8307
10Ca91.	48		38.2941	25.8403	9.4192	<0.14	<0.05	23.8201	1.9136	99.4526	3	2.3858	0.0011	0.0074	0.5553	2.9515	1.9994	1	11.9268
11Ca104.	21		39.5777	33.0392	1.6013	<0.14	<0.05	24.3154	1.9778	100.55	3	2.9516	0.0004	0.001	0.0913	3.0443	1.9748	1	12.0422
11Ca104.	22		39.9007	32.7898	1.7843	<0.14	<0.05	24.6428	1.9939	101.135	3	2.9056	0.0004	0	0.101	3.0079	1.9852	1	11.9971
11Ca104.	24		40.4441	32.8313	2.0259	<0.14	<0.05	24.3126	2.0211	101.918	3	2.8702	0.0018	0.001	0.1131	3.0117	1.9323	1	11.9379
11Ca104.	54		39.1712	33.5701	1.3568	<0.14	<0.05	24.7338	1.9575	100.811	3	3.0301	0.0011	0	0.0782	3.1094	2.0296	1	12.1944
11Ca104.	55		40.8977	31.9206	1.4383	<0.14	<0.05	24.6764	2.0437	101.763	3	2.7596	0.002	0	0.0794	2.9205	1.9394	1	11.7831
11Ca104.	62		40.1831	32.9126	1.6199	<0.14	<0.05	24.4176	2.008	101.2	3	2.896	0.0012	0	0.091	2.9889	1.9532	1	11.9391
11Ca104.	66		39.4515	32.9768	1.7829	<0.14	<0.05	24.5155	1.9715	100.713	3	2.9554	0	0	0.102	3.058	1.9974	1	12.0849
Felsic rock	lab#	Comment	SiO2	Al2O3	Fe2O3	Mn2O3	TiO2	CaO	H2O*	sum	Si	Al	Ti	Mn3+	Fe3+	sum	Ca	OH	O*
11Ca101a	71		37.34	23.2601	13.1917	0.1224	<0.05	23.77	1.866	99.6301	3	2.2025	0.0018	0.0075	0.7976	3.013	2.0462	1	12.0749
11Ca101a	72		37.78	23.0399	13.3472	<0.14	<0.05	23.68	1.888	99.8842	3	2.1562	0.0024	0.0054	0.7976	2.9628	2.0147	1	11.9696
11Ca101a	73		37.27	23.12	13.3472	<0.14	<0.05	23.6099	1.8625	99.4499	3	2.1933	0.0024	0.0061	0.8085	3.014	2.0362	1	12.063
11Ca101a	74		37.9901	22.95	13.3362	<0.14	0.0701	23.17	1.8985	99.6317	3	2.1359	0.0042	0.004	0.7925	2.939	1.9604	1	11.8813
11Ca101a	75		37.4801	23.62	12.8916	0.1558	0.0501	23.55	1.873	99.6405	3	2.2282	0.003	0.0095	0.7765	3.0196	2.0197	1	12.0504
11Ca101a	76		37.55	23.2901	13.025	<0.14	<0.05	23.69	1.8765	99.6107	3	2.193	0.0006	0.0054	0.7831	2.9845	2.0279	1	12.0107
11Ca101a	77		37.5299	23.1501	13.3362	<0.14	0.12	23.7401	1.8755	99.9318	3	2.181	0.0072	0.0061	0.8022	3.0001	2.0333	1	12.0412
11Ca101a	78		37.34	23.1599	13.4029	<0.14	0.0501	23.39	1.866	99.3899	3	2.193	0.003	0.0068	0.8103	3.0156	2.0135	1	12.0431
11Ca101a	79		37.55	23.2901	13.3251	<0.14	0.0601	23.71	1.8765	99.9586	3	2.193	0.0036	0.0041	0.8011	3.0042	2.0296	1	12.0398
11Ca101a	80		37.62	23.0299	13.2918	<0.14	<0.05	23.43	1.88	99.4819	3	2.1645	0.0024	0.0061	0.7976	2.973	2.0019	1	11.9803
11Ca101a	81		38.2601	23.5501	13.1361	<0.14	<0.05	23.2	1.9119	100.526	3	2.1763	0.0012	0.0046	0.7751	2.9608	1.9491	1	11.9131
11Ca101a	82		36.96	21.9799	11.8137	<0.14	2.73	23.9	1.847	99.4818	3	2.1027	0.1667	0.0069	0.7216	3.0015	2.0785	1	12.1705
11Ca101a	83		37.5201	23.25	13.214	<0.14	0.0999	23.5701	1.875	99.8115	3	2.191	0.006	0.0075	0.7951	3.0043	2.0193	1	12.0354
11Ca101a	84		38.24	23.2801	12.3581	0.1447	<0.05	23	1.9109	99.074	3	2.1525	0.0024	0.0086	0.7296	2.8966	1.9333	1	11.7847
11Ca101a	85		36.96	23.1699	12.736	<0.14	0.4099	22.9899	1.847	98.3953	3	2.2165	0.025	0.0076	0.7779	3.0295	1.9994	1	12.0653
11Ca101a	86		37.46	23.09	13.2362	<0.14	0.0701	23.68	1.872	99.4916	3	2.1794	0.0042	0.002	0.7977	2.9857	2.0319	1	12.0215
11Ca101a	87		37.7501	23.5401	13.2583	<0.14	<0.05	23.62	1.8865	100.183	3	2.2048	0	0.0047	0.7929	3.0048	2.0112	1	12.0272
11Ca101a	88		37.5699	23.2901	12.8361	<0.14	<0.05	23.19	1.8775	98.9628	3	2.1918	0.0018	0.0054	0.7713	2.9739	1.9841	1	11.9581
11Ca101a	89		37.54	23.1599	13.425	<0.14	<0.05	23.6	1.876	99.7877	3	2.1813	0.0012	0.0041	0.8073	2.9975	2.0207	1	12.0205
11Ca101a	90		37.8399	23.09	13.2362	<0.14	0.0899	23.58	1.8909	99.826	3	2.1575	0.0054	0.0054	0.7897	2.9591	2.003	1	11.956
11Ca101a	91		37.85	24.27	11.6913	<0.14	0.0601	23.6	1.8914	99.445	3	2.2672	0.0036	0.0013	0.6973	2.9741	2.0042	1	11.9668
11Ca101a	92		37.6099	23.1401	13.0694	<0.14	<0.05	23.53	1.8795	99.4602	3	2.1754	0.0018	0.0068	0.7845	2.972	2.011	1	11.9715
11Ca101a	93		37.9	23.7901	12.4249	0.1892	0.0501	23.58	1.8939	99.9382	3	2.2194	0.003	0.0114	0.7401	2.9786	1.9999	1	11.9713
11Ca101a	94		38.09	23.1799	13.0138	<0.14	0.0601	23.2701	1.9034	99.7564	3	2.1517	0.0036	0.0053	0.7713	2.9331	1.9637	1	11.879
11Ca101a	95		37.5601	23.74	12.3137	<0.14	0.0799	23.7401	1.877	99.4474	3	2.2348	0.0048	0.0041	0.7401	2.9885	2.0317	1	12.025
Proportions of cations are based on normalization of Si to three cations

## Sheet: Feldspar
Feldspar
Birchy Complex
Mafic rock	lab#	SiO2	Al2O3	FeO	MgO	CaO	BaO	Na2O	K2O	Sum	Si	AlIV	sum	AlVI	Fe3+	Mg	sum	Ca	Ba	Na	K	sum	O*	XAlbite	XAnorthite	XOrthoclase
10Ca47.	24	64.4988	18.4412	0.1325	<0.08	<0.07	0.2445	0.31	15.8285	99.4555	2.9964	0.0036	3	1.0061	0.0051		1.0113		0.0045	0.0279	0.9381	0.9705	8	2.8775	0	96.6638
10Ca47.	25	63.9084	18.3883	0.1595	<0.08	<0.07	0.1384	0.4516	16.4296	99.4758	2.9824	0.0176	3	0.9937	0.0062		0.9999		0.0025	0.0409	0.9781	1.0215	8	3.9998	0	95.7524
10Ca47.	27	63.3521	18.717	0.3088	<0.08	<0.07	0.4935	0.2602	16.155	99.3032	2.9669	0.0331	3	0.9999	0.0121		1.0129		0.0091	0.0236	0.9652	0.9978	8	2.3673	0	96.7251
10Ca47.	71	64.0324	18.4808	0.0991	<0.08	<0.07	0.1485	0.2008	16.5224	99.5287	2.9839	0.0161	3	0.9989	0.0039		1.0052		0.0027	0.0181	0.9822	1.0036	8	1.8082	0.0487	97.8729
10Ca47.	72	62.8173	18.0425	0.2444	<0.08	<0.07	0.2814	0.1779	15.9454	97.6385	2.985	0.015	3	0.9954	0.0097		1.0097		0.0052	0.0164	0.9666	0.9914	8	1.6536	0.3162	97.5018
10Ca47.	73	64.6614	18.5715	0.1505	<0.08	<0.07	0.1306	0.2588	16.0839	99.898	2.9922	0.0078	3	1.0051	0.0058		1.0119		0.0024	0.0232	0.9495	0.9759	8	2.3795	0.0782	97.2995
16Ca107.	1	68.3689	20.1511	0.0142	<0.08	<0.07	<0.08	12.0225	0.0747	100.694	2.9703	0.0297	3	1.0021	0.0005		1.0029			1.0127	0.0041	1.0194	8	99.3448	0.2492	0.4061
16Ca107.	4	68.7925	19.9357	0.1441	<0.08	0.0784	<0.08	11.3917	0.0578	100.457	2.9879	0.0121	3	1.0084	0.0052		1.0155			0.9593	0.0032	0.9662	8	99.291	0.3774	0.3316
16Ca107.	25	67.5452	19.384	0.4554	0.471	0.5401	<0.08	11.5427	0.0482	100.014	2.9647	0.0353	3	0.9675	0.0167	0.0308	1.016	0.0254		0.9823	0.0027	1.0104	8	97.2191	2.5139	0.267
16Ca107.	4	65.9771	16.7066	2.3131	2.368	2.6249	<0.08	9.2646	0.059	99.3994	2.9509	0.0491	3	0.8315	0.0865	0.1579	1.0791	0.1258		0.8034	0.0034	0.9326	8	86.1501	13.4887	0.3611
Spessartine		SiO2	Al2O3	FeO	MgO	CaO	BaO	Na2O	K2O	Sum	Si	AlIV	sum	AlVI	Fe3+	Mg	sum	Ca	Ba	Na	K	sum	O*	XAlbite	XAnorthite	XOrthoclase
quartzite
10Ca48	105	70.7756	19.8054	0.1775	<0.08	0.1651	<0.08	9.8739	0.1349	101.032	3.0333	0	3.0333	1.0004	0.0064		1.0114	0.0076		0.8205	0.0074	0.8354	8	98.2095	0.9075	0.883
Metapelite	lab#	SiO2	Al2O3	FeO	MgO	CaO	BaO	Na2O	K2O	Sum	Si	AlIV	sum	AlVI	Fe3+	Mg	sum	Ca	Ba	Na	K	sum	O*	XAlbite	XAnorthite	XOrthoclase
11Ca105.	83	59.8008	20.1115	0.0836	<0.08	0.077	<0.08	12.0401	0.0675	92.2303	2.863	0.137	3	0.9978	0.0033		1.0035	0.0039		1.1176	0.0041	1.1257	8	99.2833	0.3507	0.366
11Ca105.	84	59.5163	20.1644	0.0901	<0.08	<0.07	<0.08	11.7839	0.0964	91.7433	2.8627	0.1373	3	1.0057	0.0036		1.0096			1.0989	0.0059	1.1086	8	99.1257	0.2992	0.5334
11Ca105.	85	60.3314	20.1681	0.1055	<0.08	<0.07	<0.08	11.7354	0.0602	92.4503	2.875	0.125	3	1.0077	0.0042		1.0127			1.0843	0.0037	1.0898	8	99.4936	0.1704	0.336
16Ca106.	48	66.328	18.1748	0	<0.08	0.1035	<0.08	11.9187	<0.05	96.5611	3.0068	0	3.0068	0.971	0		0.971	0.005		1.0476		1.0547	8	99.325	0.4768	0.1982
16Ca106.	57	68.4972	18.9457	0	<0.08	0.1553	<0.08	11.916	0.0675	99.6136	3.0062	0	3.0062	0.98	0		0.9814	0.0073		1.014	0.0038	1.025	8	98.919	0.7125	0.3685
16Ca71.	35	67.8469	20.1795	0.1763	<0.08	0.284	<0.08	10.8889	0.0602	99.489	2.9746	0.0254	3	1.0174	0.0065		1.0262	0.0133		0.9256	0.0034	0.9423	8	98.2266	1.416	0.3575
16Ca71.	36	66.8606	21.3226	0.0875	<0.08	1.6189	<0.08	10.2715	0.065	100.249	2.9188	0.0812	3	1.0158	0.0032		1.0197	0.0757		0.8694	0.0036	0.9487	8	91.6368	7.9814	0.3818
16Ca71.	37	68.5614	19.9697	0.0952	<0.08	0.0742	<0.08	11.4416	<0.05	100.164	2.9859	0.0141	3	1.011	0.0035		1.0144	0.0035		0.9661		0.9708	8	99.5195	0.3565	0.1241
16Ca72.	55	68.7069	19.6391	0	<0.08	0.4338	<0.08	11.7031	<0.05	100.553	2.9872	0.0128	3	0.9936	0		0.9951	0.0202		0.9865		1.0089	8	97.7853	2.0028	0.2119
16Ca72.	56	68.478	19.6996	0.0077	<0.08	0.6688	<0.08	11.6235	0.0614	100.561	2.9798	0.0202	3	0.9901	0.0003		0.9913	0.0312		0.9807	0.0034	1.0153	8	96.5926	3.0714	0.3359
16Ca72.	59	62.5306	20.427	0.0283	<0.08	0.5303	<0.08	11.3742	0.0566	94.9793	2.894	0.106	3	1.0082	0.0011		1.0101	0.0263		1.0206	0.0033	1.0506	8	97.1461	2.503	0.3182
16Ca72.	63	68.2919	18.8021	0.0167	<0.08	0.305	<0.08	11.8931	<0.05	99.3753	3.0063	0	3.0063	0.9755	0.0006		0.9767	0.0144		1.0151		1.0311	8	98.4465	1.3953	0.0984
16Ca74.	17	65.4038	20.153	0.0875	<0.08	0.3876	<0.08	12.0859	0.0458	98.1735	2.9282	0.0718	3	0.9916	0.0033		0.9955	0.0186		1.0491	0.0026	1.0703	8	98.0187	1.7371	0.2443
16Ca74.	57	67.8426	19.0836	0	<0.08	0.3036	<0.08	11.885	0.0494	99.1814	2.9933	0.0067	3	0.9857	0		0.9863	0.0144		1.0167	0.0028	1.0339	8	98.3427	1.3884	0.2689
BVOT and cover
Mafic rock	lab#	SiO2	Al2O3	FeO	MgO	CaO	BaO	Na2O	K2O	Sum	Si	AlIV	sum	AlVI	Fe3+	Mg	sum	Ca	Ba	Na	K	sum	O*	XAlbite	XAnorthite	XOrthoclase
10Ca68.	30	68.9016	19.8658	0.0309	<0.08	0.4142	<0.08	11.7368	0.0723	101.021	2.9825	0.0175	3	0.996	0.0011		0.9971	0.0192		0.985	0.004	1.0082	8	97.6989	1.9052	0.3959
10Ca68.	50	69.7616	19.8299	0.0849	<0.08	0.1763	<0.08	11.8163	0.0723	101.745	2.9949	0.0051	3	0.9983	0.003		1.0015	0.0081		0.9836	0.004	0.9956	8	98.7879	0.8145	0.3976
10Ca73.	28	68.1828	20.7199	0.3538	0.1691	0.5205	<0.08	10.6557	1.1167	101.759	2.9457	0.0543	3	1.0007	0.0128	0.0109	1.025	0.0241		0.8926	0.0615	0.9786	8	91.2118	2.4622	6.2893
10Ca73.	29	69.2481	19.7468	0.1261	<0.08	0.382	<0.08	11.2879	0.5288	101.348	2.9906	0.0094	3	0.9957	0.0046		1.002	0.0177		0.9452	0.0291	0.992	8	95.2811	1.7818	2.9371
10Ca73.	44	68.0373	19.5975	0.4001	0.3184	0.5121	<0.08	11.5292	0.1012	100.505	2.9691	0.0309	3	0.977	0.0146	0.0207	1.0123	0.0239		0.9755	0.0056	1.0052	8	97.0423	2.3821	0.5604
10Ca75.	2	66.0776	21.0864	0.6793	0.3516	0.5135	<0.08	9.9884	1.4889	100.209	2.909	0.091	3	1.0031	0.025	0.0231	1.0512	0.0242		0.8526	0.0836	0.9608	8	88.734	2.521	8.703
10Ca75.	125	68.048	19.6731	0.2354	<0.08	0.5205	<0.08	11.5966	0.1566	100.242	2.975	0.025	3	0.9886	0.0086		0.9978	0.0244		0.983	0.0087	1.0161	8	96.7409	2.3996	0.8596
10Ca75.	18	64.6614	18.0047	0.1389	<0.08	<0.07	<0.08	0.2292	16.3417	99.6058	3.0073	0	3.0073	0.9869	0.0054		0.9928			0.0207	0.9696	0.9943	8	2.0782	0	97.5125
10Ca75.	20	64.794	18.1181	0.1904	<0.08	<0.07	<0.08	0.4704	15.8369	99.6618	3.0045	0	3.0045	0.9902	0.0074		1.0001			0.0423	0.9369	0.9847	8	4.2951	0.2965	95.1365
10Ca75.	21	64.9139	18.1899	0.1119	<0.08	<0.07	<0.08	0.1995	16.5175	99.9766	3.0045	0	3.0045	0.9922	0.0043		0.9972			0.0179	0.9753	0.9943	8	1.8006	0.0907	98.0924
10Ca75.	131	64.4132	17.8932	0.1814	<0.08	<0.07	<0.08	0.2265	16.8054	99.6281	3.0026	0	3.0026	0.983	0.0071		0.9922			0.0205	0.9994	1.0211	8	2.0044	0	97.8737
10Ca75.	148	63.504	17.9499	0.0901	<0.08	<0.07	<0.08	0.2763	16.9705	98.8959	2.989	0.011	3	0.9848	0.0035		0.9894			0.0252	1.019	1.0457	8	2.4116	0	97.4505
10Ca75.	159	64.0303	17.8422	0.1582	<0.08	<0.07	<0.08	0.1334	16.6537	98.8728	3.0039	0	3.0039	0.9865	0.0062		0.9932			0.0121	0.9967	1.0101	8	1.2017	0.0627	98.6707
10Ca75.	160	64.9267	18.2182	0.1505	<0.08	<0.07	<0.08	0.1645	16.6982	100.248	3.0015	0	3.0015	0.9926	0.0058		0.9996			0.0147	0.9848	1.0009	8	1.4727	0	98.3939
10Ca75.	161	64.6357	17.9367	0.2239	<0.08	<0.07	<0.08	0.1955	16.7344	99.8759	3.0043	0	3.0043	0.9826	0.0087		0.993			0.0176	0.9923	1.0121	8	1.7404	0.0275	98.0432
10Ca75.	162	64.7769	18.0803	0.1338	<0.08	<0.07	<0.08	0.1995	16.903	100.165	3.0018	0	3.0018	0.9875	0.0052		0.9927			0.0179	0.9993	1.0185	8	1.7599	0	98.1146
10Ca75.	163	64.4175	18.2673	0.2251	<0.08	<0.07	<0.08	0.1388	16.6778	99.8269	2.9929	0.0071	3	0.9931	0.0087		1.0049			0.0125	0.9885	1.0023	8	1.2478	0.0486	98.6264
10Ca79.	1	69.0856	19.8356	0.1274	<0.08	0.5513	<0.08	11.4699	0.0723	101.16	2.9854	0.0146	3	0.9957	0.0046		1.0014	0.0255		0.961	0.004	0.9905	8	97.0208	2.577	0.4023
10Ca79.	32	70.1788	19.8961	0.1775	<0.08	0.4324	<0.08	11.4348	0.0578	102.245	2.9969	0.0031	3	0.9982	0.0063		1.0074	0.0198		0.9468	0.0031	0.9697	8	97.6351	2.0401	0.3248
10Ca79.	33	69.9819	19.9754	0.1068	<0.08	0.4967	<0.08	11.2555	0.0614	101.879	2.9963	0.0037	3	1.0043	0.0038		1.0081	0.0228		0.9343	0.0034	0.9605	8	97.2764	2.3723	0.3494
10Ca79.	39	69.9648	19.8261	0.1994	<0.08	0.3988	<0.08	11.3229	<0.05	101.771	2.9994	0.0006	3	1.0012	0.0071		1.0099	0.0183		0.9412		0.9613	8	97.9027	1.9054	0.1919
10Ca79.	53	69.5862	19.6637	0.1171	<0.08	0.4435	<0.08	11.4065	0.059	101.29	2.9992	0.0008	3	0.998	0.0042		1.0027	0.0205		0.9532	0.0032	0.9769	8	97.5711	2.0967	0.3322
10Ca79.	54	69.0428	19.6712	0.0759	<0.08	0.3862	<0.08	11.5494	0.041	100.768	2.9927	0.0073	3	0.9976	0.0028		1.0004	0.0179		0.9706	0.0023	0.9908	8	97.9613	1.8101	0.2286
10Ca80.	7	69.246	19.7184	0.4245	0.1857	0.1735	<0.08	11.548	0.0458	101.342	2.9881	0.0119	3	0.9909	0.0153	0.0119	1.0182	0.008		0.9662	0.0025	0.9767	8	98.9207	0.8213	0.258
10Ca80.	8	69.6653	19.6901	0.3358	0.2338	0.3092	<0.08	11.5386	0.0735	101.86	2.9907	0.0093	3	0.9869	0.0121	0.015	1.0143	0.0142		0.9604	0.004	0.9786	8	98.1354	1.4534	0.4112
10Ca80.	9	69.0406	19.4634	0.3165	<0.08	0.2547	<0.08	11.4025	0.0554	100.554	2.9994	0.0006	3	0.9959	0.0115		1.0083	0.0119		0.9604	0.0031	0.9754	8	98.4698	1.2153	0.3149
10Ca80.	12	69.5498	19.6901	0.1171	<0.08	0.375	<0.08	11.2528	0.0602	101.078	3.0013	0	3.0013	1.0014	0.0042		1.0064	0.0173		0.9415	0.0033	0.9624	8	97.8284	1.8015	0.3445
10Ca82.	1	67.4789	20.1058	0.0566	<0.08	1.027	<0.08	11.5009	<0.05	100.25	2.9523	0.0477	3	0.9891	0.0021		0.9918	0.0481		0.9756		1.0262	8	95.0655	4.6913	0.1834
10Ca82.	18	66.9462	19.0949	0.5185	0.9585	0.4435	<0.08	10.8552	0.0735	98.8903	2.9662	0.0338	3	0.9633	0.0192	0.0633	1.0458	0.0211		0.9325	0.0042	0.9577	8	97.3677	2.1986	0.4337
10Ca84	71	69.537	19.4955	0.1492	<0.08	0.2141	<0.08	11.6801	0.0434	101.131	3.0028	0	3.0028	0.9922	0.0054		0.998	0.0099		0.9779	0.0024	0.9902	8	98.7585	1.0003	0.2413
10Ca85.	66	67.5645	20.1455	0.4966	<0.08	0.4198	<0.08	10.8282	0.4565	100.002	2.9613	0.0387	3	1.002	0.0182		1.0253	0.0197		0.9202	0.0255	0.9654	8	95.3139	2.0419	2.6442
10Ca85.	76	67.8447	20.1436	0.4271	<0.08	0.9263	<0.08	11.2326	<0.05	100.634	2.9564	0.0436	3	0.991	0.0156		1.0074	0.0432		0.949		0.9935	8	95.5211	4.353	0.0741
10Ca91	15	68.4502	19.3254	0.3113	<0.08	0.5681	<0.08	11.7004	0.0819	100.457	2.9865	0.0135	3	0.9802	0.0114		0.9923	0.0266		0.9898	0.0046	1.0209	8	96.9521	2.6013	0.4466
Felsic rock	lab#	SiO2	Al2O3	FeO	MgO	CaO	BaO	Na2O	K2O	Sum	Si	AlIV	sum	AlVI	Fe3+	Mg	sum	Ca	Ba	Na	K	sum	O*	XAlbite	XAnorthite	XOrthoclase
10Ca88.	58	64.8625	18.1766	0.0334	<0.08	<0.07	0.0882	1.0824	15.1407	99.4071	3.0055	0	3.0055	0.9927	0.0013		0.9949		0.0016	0.0972	0.895	0.9939	8	9.7846	0	90.0543
10Ca88.	62	63.4762	18.4166	0.0952	<0.08	<0.07	0.8173	0.3114	16.4031	99.597	2.9736	0.0264	3	0.9904	0.0037		0.996		0.015	0.0283	0.9803	1.0256	8	2.7576	0.1986	95.581
10Ca88.	64	63.9426	18.4147	0.0695	<0.08	<0.07	0.7983	0.6133	16.1658	100.046	2.9782	0.0218	3	0.989	0.0027		0.9919		0.0146	0.0554	0.9605	1.0322	8	5.3656	0.1691	93.0538
10Ca88.	75	68.9059	19.3651	0.027	<0.08	0.1105	<0.08	11.6154	0.0891	100.113	3.004	0	3.004	0.995	0.001		0.996	0.0052		0.9818	0.005	0.9919	8	98.9797	0.5205	0.4998
Normalisation on the basis of 16 negative charges

## Sheet: Titanite
Titanite
Birchy Complex
Mafic rock	lab#	SiO2	TiO2	Al2O3	Fe2O3	MgO	CaO	H2O*	sum	Si	Ti	Al	Fe3+	Mg	Ca	O*	OH*	sum
10Ca47.	21	28.5302	38.8359	1.06	0.4418	<0.08	28.3101	0.1186	98.4583	0.9541	0.977	0.0418	0.0111	0.0007	1.0144	4.9461	0.0528	4.9858
10Ca47.	22	31.0139	36.4683	0.8295	0.8164	<0.08	26.7906	0.1193	97.2887	1.0478	0.9269	0.033	0.0208	0.0015	0.9698	4.99085	0.0538	5.0312
10Ca47.	23	30.355	38.2602	1.1337	0.386	<0.08	27.9268	0.1219	99.4667	1.0035	0.9515	0.0442	0.0096	0.0013	0.9892	4.97095	0.0538	5.0113
10Ca47.	28	29.694	39.5483	0.7728	0.4261	<0.08	28.0765	0.0923	99.8466	0.9806	0.9826	0.0301	0.0106	0.0007	0.9935	4.97815	0.0406	5.0086
10Ca47.	38	30.3935	38.5255	1.0675	0.8235	<0.08	28.2444	0.1408	100.472	0.9961	0.9498	0.0412	0.0203	0	0.9918	4.9623	0.0616	5.0085
10Ca47.	39	30.109	38.6573	1.2848	0.8335	<0.08	27.9869	0.1605	100.242	0.9889	0.9552	0.0497	0.0206	0	0.9849	4.9593	0.0704	5.0121
10Ca47.	40	30.5176	36.4232	2.3675	1.0623	<0.08	28.0415	0.2691	99.8885	0.9986	0.8967	0.0913	0.0262	0.004	0.9832	4.90975	0.1174	4.9978
10Ca47.	41	29.9443	34.2141	3.2461	3.6845	1.2951	25.7076	0.4946	99.7719	0.9783	0.841	0.125	0.0906	0.0631	0.8999	4.8338	0.2156	4.9955
10Ca47.	42	30.4214	38.3754	1.06	0.6362	<0.08	27.7155	0.1295	99.6059	1.0053	0.954	0.0413	0.0158	0	0.9813	4.9747	0.0572	5.0176
10Ca47.	43	30.3229	36.7853	1.4473	1.3168	0.1758	27.8428	0.2021	99.229	1.002	0.9145	0.0564	0.0327	0.0087	0.9858	4.9317	0.0892	4.9985
10Ca47.	44	29.6619	36.1179	2.4336	0.7249	<0.08	27.4888	0.2559	97.7944	0.9918	0.9086	0.0959	0.0182	0	0.9848	4.91515	0.1142	5.0008
10Ca47.	50	29.8159	39.2296	0.8446	0.2645	<0.08	28.0555	0.0895	99.5386	0.9874	0.9774	0.033	0.0066	0	0.9955	4.9812	0.0396	5.0109
16Ca107.	5	29.4394	36.5	2.0406	0.4933	<0.08	29.1161	0.2081	98.0157	0.9716	0.9062	0.0794	0.0123	0	1.0296	4.8833	0.0916	4.952
16Ca107.	6	29.6983	37.2825	1.4587	0.5147	<0.08	28.8083	0.1579	98.0513	0.9809	0.9264	0.0568	0.0128	0.0029	1.0195	4.9084	0.0696	4.9606
16Ca107.	7	29.4522	37.0789	1.6873	0.4647	<0.08	29.1665	0.1753	98.3795	0.9713	0.92	0.0656	0.0115	0	1.0307	4.9013	0.0772	4.9591
16Ca107.	10	28.9452	37.466	1.5286	0.356	<0.08	29.3218	0.1551	98.12	0.9575	0.9324	0.0596	0.0089	0	1.0393	4.8984	0.0684	4.9498
16Ca107.	11	28.5751	37.109	1.5683	0.3188	<0.08	29.0629	0.1565	96.929	0.9545	0.9326	0.0617	0.008	0	1.0402	4.88845	0.0698	4.9408
16Ca107.	12	29.3923	36.2948	2.2995	0.4661	<0.08	29.0643	0.2294	97.9977	0.9691	0.9003	0.0894	0.0116	0	1.0267	4.87435	0.101	4.9501
16Ca107.	13	29.4073	36.9305	1.6873	0.3946	<0.08	28.9412	0.1713	97.6579	0.9741	0.9203	0.0659	0.0098	0	1.0272	4.89515	0.0758	4.952
16Ca107.	28	29.694	35.1902	2.0142	0.8764	0.3018	26.7318	0.2274	95.701	1.0087	0.8993	0.0806	0.0224	0.0153	0.973	4.92805	0.103	5.0053
16Ca107.	131	29.4736	36.6919	1.6438	0.6477	<0.08	28.6795	0.1818	97.604	0.9794	0.9173	0.0644	0.0162	0	1.0211	4.90415	0.0806	4.9645
16Ca107.	142	29.1185	35.6941	1.8082	1.1967	<0.08	28.5046	0.2272	96.7697	0.9746	0.8988	0.0713	0.0301	0	1.0222	4.87665	0.1014	4.9528
16Ca107.	143	55.0344	20.4474	1.5871	0.5533	0.1459	17.367	0.1714	95.3615	1.8037	0.5042	0.0613	0.0136	0.0071	0.6099	5.30905	0.075	5.3653
16Ca107.	144	30.8471	32.6541	3.2215	2.8981	1.514	26.764	0.4481	98.6392	1.0019	0.7979	0.1233	0.0708	0.0733	0.9314	4.80795	0.1942	4.9535
Metapelite	lab#	SiO2	TiO2	Al2O3	Fe2O3	MgO	CaO	H2O*	sum	Si	Ti	Al	Fe3+	Mg	Ca	O*	OH*	sum
10Ca49.	1	30.6909	38.8859	1.1337	0.2488	<0.08	28.1143	0.1142	100.595	1.0053	0.9582	0.0438	0.0061	0	0.9867	4.98295	0.0498	5.0203
10Ca49.	2	30.5476	38.6624	1.0997	0.1787	<0.08	28.4837	0.1072	100.444	1.0002	0.9523	0.0424	0.0044	0.0006	0.9992	4.97	0.0468	5.0051
10Ca49.	3	30.9027	37.1474	2.3996	0.1587	<0.08	28.2108	0.2209	100.356	1.0068	0.9105	0.0921	0.0039	0.0019	0.9848	4.935	0.096	5.0071
10Ca49.	4	29.2832	40.471	2.137	0.203	<0.08	26.8228	0.2002	100.521	0.9635	1.0018	0.0829	0.005	0.0012	0.9456	4.98455	0.0878	5.0505
10Ca49.	5	31.1338	36.9521	2.8777	0.2745	0.0829	27.2551	0.2697	100.543	1.0167	0.9078	0.1107	0.0067	0.004	0.9536	4.95045	0.1174	5.0385
10Ca49.	6	30.5625	38.1468	1.453	0.2545	<0.08	28.0793	0.1427	99.8725	1.0045	0.9433	0.0563	0.0063	0.0004	0.9889	4.96435	0.0626	5.0113
10Ca49.	7	30.4663	37.8948	2.1483	0.0858	<0.08	28.0205	0.1946	100.154	0.9974	0.9333	0.0829	0.0021	0.0007	0.9829	4.94795	0.085	5.0117
10Ca49.	8	28.6457	41.3002	1.8573	0.2917	<0.08	26.2393	0.1805	99.9491	0.9517	1.0322	0.0727	0.0073	0.0021	0.934	5.0044	0.08	5.0644
10Ca49.	9	31.0503	37.4227	2.1634	0.1001	0.0829	27.5182	0.1968	99.9882	1.0187	0.9237	0.0837	0.0025	0.0041	0.9674	4.96365	0.0862	5.0282
10Ca49.	10	30.6759	38.0183	1.6627	0.1458	<0.08	28.0135	0.1551	100.123	1.007	0.9389	0.0643	0.0036	0.0008	0.9853	4.9664	0.068	5.0174
11Ca105.	66	29.9913	38.075	1.3075	0.7992	<0.08	26.7486	0.1606	98.5185	1.0052	0.9601	0.0516	0.0202	0.0023	0.9606	4.98465	0.0718	5.0385
11Ca105.	77	26.5106	37.1357	0.8786	1.1224	<0.08	27.4874	0.1409	94.3286	0.9269	0.9768	0.0362	0.0295	0.0009	1.0297	4.91805	0.0658	4.9674
11Ca105.	78	25.5693	37.1107	0.8899	1.0552	<0.08	27.16	0.1381	92.9603	0.9083	0.9917	0.0373	0.0282	0.0007	1.0337	4.91445	0.0654	4.9635
11Ca105.	79	26.2518	37.0906	1.06	1.2682	<0.08	27.6511	0.1652	94.6228	0.9146	0.9721	0.0435	0.0332	0.003	1.0322	4.9009	0.0768	4.9584
11Ca105.	80	26.1042	37.9165	0.6405	1.1166	<0.08	28.0359	0.1196	94.9255	0.9074	0.9916	0.0262	0.0292	0	1.0442	4.91185	0.0554	4.9535
11Ca105.	121	29.6897	37.0573	1.3396	1.2811	<0.08	29.1189	0.1906	98.775	0.9751	0.9156	0.0519	0.0317	0	1.0247	4.8922	0.0836	4.9548
11Ca105.	125	29.7838	37.1991	1.2168	0.8636	<0.08	29.0181	0.1562	98.5726	0.9819	0.9226	0.0473	0.0214	0	1.025	4.9128	0.0688	4.9644
11Ca105.	29	28.926	36.837	1.5021	0.549	<0.08	28.8195	0.1637	97.0012	0.9673	0.9267	0.0592	0.0138	0	1.0326	4.90035	0.073	4.9551
BVOT and cover
Mafic rock	lab#	SiO2	TiO2	Al2O3	Fe2O3	MgO	CaO	H2O*	sum	Si	Ti	Al	Fe3+	Mg	Ca	O*	OH*	sum
10Ca68.	40	31.1573	33.5017	4.2872	0.2674	0.1028	28.9482	0.3938	99.6606	1.0074	0.8149	0.1634	0.0065	0.005	1.0029	4.83525	0.1698	4.9626
10Ca68.	41	30.7273	33.0379	4.2853	1.5284	1.3333	26.8368	0.4648	99.2098	0.9963	0.8059	0.1638	0.0373	0.0644	0.9323	4.81495	0.201	4.9658
10Ca73.	1	29.9635	37.5411	0.9334	0.9093	<0.08	28.2066	0.1338	98.8872	0.9959	0.9387	0.0366	0.0227	0.0007	1.0045	4.94985	0.0594	4.9944
10Ca73.	14	30.1261	37.5895	0.7728	0.8235	<0.08	28.2682	0.1147	98.8808	1.0015	0.9401	0.0303	0.0206	0.0004	1.0069	4.9574	0.0508	4.9955
10Ca73.	15	29.9079	37.3542	0.8181	1.0223	<0.08	27.924	0.1299	98.2681	1.0006	0.9402	0.0323	0.0257	0.0002	1.0009	4.9553	0.058	4.9988
10Ca73.	16	30.1368	36.1179	1.1299	1.2739	0.0862	28.138	0.1717	98.1656	1.0053	0.9064	0.0444	0.032	0.0043	1.0057	4.9254	0.0764	4.9827
10Ca75.	9	30.6802	34.9349	2.1068	1.6614	<0.08	28.2024	0.2798	99.0368	1.0115	0.8665	0.0819	0.0412	0.0009	0.9963	4.89215	0.123	4.9845
10Ca75.	10	30.5732	32.4422	3.3576	3.2226	0.9568	26.1764	0.4784	98.3894	1.0088	0.8053	0.1306	0.08	0.0471	0.9254	4.82875	0.2106	4.9867
10Ca75.	11	30.5326	34.3059	2.3259	1.8701	<0.08	27.7729	0.311	98.3528	1.012	0.8555	0.0909	0.0466	0.0066	0.9863	4.8812	0.1376	4.9844
10Ca75.	12	30.5048	34.8115	2.2863	1.72	<0.08	27.0774	0.299	98.3632	1.012	0.8688	0.0894	0.0429	0.0222	0.9625	4.8964	0.1324	4.9957
10Ca75.	17	30.2802	34.0206	2.4809	1.7157	<0.08	27.8232	0.3159	97.7422	1.01	0.8537	0.0975	0.0431	0.0011	0.9944	4.87815	0.1406	4.9836
10Ca75.	33	30.5625	36.1646	1.6608	1.4197	<0.08	27.556	0.2268	98.8694	1.0143	0.9029	0.065	0.0355	0.0002	0.9799	4.9332	0.1004	5.0085
10Ca75.	44	31.7007	34.2976	2.6509	1.4812	<0.08	27.0089	0.3177	98.989	1.0477	0.8528	0.1033	0.0368	0.0023	0.9564	4.926	0.14	5.0311
10Ca75.	45	30.4706	34.1357	2.3769	2.2404	0.524	27.2328	0.3364	98.3861	1.0088	0.8502	0.0927	0.0558	0.0259	0.966	4.87295	0.1486	4.9844
10Ca75.	67	30.6267	34.5562	2.1559	1.557	<0.08	27.7337	0.2783	98.0128	1.0197	0.8656	0.0846	0.039	0.0008	0.9893	4.8996	0.1236	4.9923
10Ca79.	37	30.7572	37.5244	1.2641	0.6291	<0.08	28.194	0.1472	99.8014	1.0114	0.9283	0.049	0.0156	0.0018	0.9934	4.95615	0.0646	5.0045
10Ca80.	25	30.3401	38.1535	0.9617	0.7277	<0.08	27.9366	0.126	99.5183	1.0037	0.9496	0.0375	0.0181	0.0007	0.9902	4.9697	0.0556	5.0114
10Ca80.	33	30.4021	37.6045	1.0864	0.9636	<0.08	28.2612	0.1503	99.7215	1.002	0.9324	0.0422	0.0239	0.0011	0.998	4.95045	0.0662	5
10Ca80.	34	30.5861	37.5728	1.1601	1.0023	<0.08	28.1954	0.159	100.036	1.005	0.9288	0.0449	0.0248	0.0014	0.9927	4.95025	0.0698	5.0025
10Ca80.	51	30.4385	35.8526	1.9273	1.2067	<0.08	28.2682	0.2383	99.2379	1.0039	0.8896	0.0749	0.03	0.0017	0.999	4.9107	0.1048	4.9893
10Ca82	68	29.69	36.67	1.92	0.82	0.8	26.87	0.96	97.73	0.989	0.918	0.075	0.02	0.04	0.958	4.92	0.096	4.992
10Ca84	90	30.5454	33.465	3.8224	0.9079	0.0895	27.9589	0.3889	98.4951	1.0061	0.8292	0.1484	0.0225	0.0044	0.9867	4.8522	0.1708	4.9803
10Ca85.	62	33.1683	33.1863	4.8635	0.88911	<0.08	25.6489	0.4799	100.257	1.0799	0.8129	0.1866	0.0218	0.0039	0.8948	4.92	0.2084	5.0763
10Ca85.	81	31.5466	36.4432	2.598	0.56277	<0.08	27.4622	0.2613	100.477	1.0296	0.8948	0.0999	0.0138	0.0015	0.9603	4.94565	0.1138	5.031
10Ca85.	82	31.26	35.1101	3.4369	1.18104	0.141	26.813	0.3703	99.7546	1.0243	0.8655	0.1327	0.0292	0.0069	0.9414	4.89965	0.1618	5.0211
10Ca85.	99	35.5301	33.0495	4.1058	0.63714	<0.08	26.0784	0.3987	101.49	1.1376	0.7961	0.1549	0.0154	0.0013	0.8947	4.957	0.1704	5.0848
10Ca91.	185	30.1069	34.4928	2.3958	1.7986	<0.08	27.9659	0.3131	98.2928	1.0003	0.8622	0.0938	0.045	0.003	0.9956	4.8778	0.1388	4.9819
10Ca91.	186	30.5091	32.6941	3.1233	2.1232	0.1211	28.2696	0.3957	98.2938	1.0074	0.8122	0.1215	0.0528	0.006	1.0002	4.8339	0.1744	4.9647
Sum of cations = 3; OH = (Al + Fe); O´=[(Σ positive charges) - OH] * 0.5; *calculated

## Sheet: Biotite
Biotite
Birchy Complex
	lab#	SiO2	Al2O3	TiO2	FeO	MgO	MnO	CaO	BaO	Na2O	K2O	H2O*	sum	Si	AlIV	sum	AlVI	Ti	Fe	Mg	Mn	sum	Ca	Ba	Na	K	sum	OH	O	XMg
10Ca48*	76	35.7098	14.7813	1.7386	20.2224	9.686	1.5831	0.0196	0.153	0.0391	9.8501	3.7959	97.5788	5.6413	2.3587	8	0.3934	0.2066	2.6717	2.2811	0.2119	5.7647	0.0033	0.0095	0.012	1.9851	2.0099	4	20	0.460568
10Ca48*	77	35.6092	14.7133	1.7936	20.1453	9.7208	1.6335	0.049	0.1407	0.0445	9.5332	3.7856	97.1686	5.6408	2.3592	8	0.3876	0.2138	2.6688	2.2955	0.2192	5.7849	0.0083	0.0087	0.0137	1.9265	1.9572	4	20	0.462402
10Ca48*	78	35.1065	15.2348	1.7119	20.4296	9.7556	1.7251	0.0308	0.1396	0	9.8103	3.7931	97.7372	5.5502	2.4498	8	0.3888	0.2036	2.7011	2.2992	0.231	5.8238	0.0052	0.0086	0	1.9786	1.9925	4	20	0.459812
10Ca48*	80	35.6798	14.6774	1.817	20.6547	9.817	1.5147	0	0.1384	0.0054	9.6983	3.8018	97.8045	5.6278	2.3722	8	0.3563	0.2156	2.7246	2.3084	0.2024	5.8072	0	0.0086	0.0016	1.9515	1.9617	4	20	0.458653
10Ca48*	81	36.2981	14.7851	1.7269	20.0694	9.9082	1.6567	0	0.1652	0.0283	9.9573	3.8361	98.4311	5.6742	2.3258	8	0.3982	0.2031	2.6238	2.309	0.2194	5.7534	0	0.0101	0.0086	1.9857	2.0044	4	20	0.468091
10Ca48*	86	38.6107	14.0633	1.7402	20.1067	9.545	1.3997	0.0266	0.1105	0.0822	9.3068	3.8984	98.8902	5.9393	2.0607	8	0.4888	0.2014	2.5866	2.1888	0.1824	5.6481	0.0044	0.0067	0.0245	1.8263	1.8619	4	20	0.458349
10Ca48*	104	36.1441	14.2031	2.0573	19.7426	9.9546	1.556	0.0448	0.144	0.0337	9.1405	3.7923	96.8129	5.7153	2.2847	8	0.3623	0.2447	2.6108	2.3466	0.2084	5.7728	0.0076	0.0089	0.0103	1.8439	1.8707	4	20	0.473353
11Ca105**		35.1835	14.598	0.9444	23.8066	8.0493	0.1653	0.114	0.1686	0.0108	8.7539	3.6914	95.4858	5.7155	2.2845	8	0.5104	0.1154	3.2343	1.9493	0.0227	5.8321	0.02	0.0107	0.0034	1.8142	1.8483	4	20	0.376051
11Ca105**		34.9332	15.1138	1.0061	24.5605	7.8951	0.1937	0.0532	0.1295	0.0202	9.2622	3.7236	96.8911	5.6258	2.3742	8	0.4944	0.1219	3.3079	1.8954	0.0264	5.846	0.0092	0.0082	0.0063	1.9029	1.9266	4	20	0.364269
11Ca106**	96	35.1065	13.8706	1.0311	25.8753	7.4639	0.1756	0.0238	0.1105	0.0499	9.0394	3.682	96.4286	5.7175	2.2825	8	0.3799	0.1263	3.5243	1.8121	0.0242	5.8669	0.0042	0.0071	0.0157	1.8781	1.905	4	20	0.339573
11Ca106**	105	34.5332	14.7095	1.0945	24.9053	7.4324	0.2144	0.1497	0.1597	0.0553	8.8816	3.6729	95.8083	5.6381	2.3619	8	0.4685	0.1344	3.4006	1.809	0.0296	5.8422	0.0262	0.0102	0.0175	1.8499	1.9038	4	20	0.347244
11Ca106**	121	33.6667	14.2012	1.178	23.2702	6.9366	0.1059	0.0182	0.0659	0.0162	8.949	3.54	91.9477	5.703	2.297	8	0.5383	0.1501	3.2967	1.7517	0.0152	5.7519	0.0033	0.0044	0.0053	1.9339	1.9469	4	20	0.346981
BVOT and cover sequence
	lab#	SiO2	Al2O3	TiO2	FeO	MgO	MnO	CaO	BaO	Na2O	K2O	H2O*	sum	Si	AlIV	sum	AlVI	Ti	Fe	Mg	Mn	sum	Ca	Ba	Na	K	sum	OH	O	XMg
11Ca101a***	5	37.1799	16.0601	1.5801	16.57	12.8701	0.09	0.02	0.03	0.09	7.53	3.9025	95.9227	5.7131	2.2869	8	0.6216	0.1827	2.1294	2.9482	0.0117	5.8935	0.0033	0.0018	0.0268	1.4761	1.508	4	20	0.580629
11Ca101a***	6	36.9399	15.86	1.4499	16.25	13.07	0.09	0	0	0.0799	8.4901	3.8908	96.1206	5.6933	2.3067	8	0.5742	0.1681	2.0945	3.003	0.0118	5.8516	0	0	0.0239	1.6693	1.6932	4	20	0.589112
11Ca101a***	7	37.3601	16.4601	1.4499	16.2701	13.2	0.07	0.0299	0.02	0.05	8.97	3.9566	97.8366	5.6624	2.3376	8	0.6026	0.1653	2.0623	2.9825	0.009	5.8216	0.0049	0.0012	0.0147	1.7344	1.7551	4	20	0.591203
11Ca101a***	8	37.5601	16.6399	1.6099	16.2301	12.6299	0.12	0	0.06	0.1	7.6	3.9368	96.4867	5.7212	2.2788	8	0.7085	0.1845	2.0675	2.868	0.0155	5.8439	0	0.0036	0.0295	1.4768	1.51	4	20	0.581096
11Ca101a***	10	37.1701	16.4	1.5901	16.48	12.75	0.11	0.0099	0.06	0.1401	7.63	3.9154	96.2555	5.6928	2.3072	8	0.6531	0.1832	2.1109	2.9111	0.0143	5.8725	0.0016	0.0036	0.0416	1.4908	1.5376	4	20	0.579669
10Ca88***	91	30.4363	15.0741	2.5978	29.0131	5.532	0.2841	0.063	0.1541	0.1631	6.1423	3.4995	92.9594	5.2155	2.7845	8	0.2599	0.3349	4.1578	1.4132	0.0412	6.207	0.0116	0.0103	0.0542	1.3427	1.4188	4	20	0.253671
Normalization based on 44 negative charges
* Spessartine quartzite; ** Metapelite; ***Felsic rock

## Sheet: Garnet
Garnet
Birchy Complex
Spessartine
quartzite	lab#	Comment	SiO2	Al2O3	TiO2	Fe2O3	FeO	MnO	MgO	CaO	Sum	Si	Alt	Sum	Alo	Fe3+	Ti	Sum1	Fe2+	Mn	Ca	Mg	Sum2	Xand	Xgross	Xspes	Xpyr	Xalm
10Ca48.	53		36.957	20.4459	0.0417	0.6233	13.0207	23.2441	0.6301	4.8916	99.8545	6.0099	0	6.0099	3.9186	0.0763	0.0051	4	1.7708	3.2019	0.8523	0.1528	5.9778	0.0128	0.1298	0.5356	0.0256	0.2962
10Ca48.	54		36.6468	20.308	0.03	0.9565	12.048	24.3262	0.3748	5.2414	99.9317	5.976	0.024	6	3.8789	0.1174	0.0037	4	1.6431	3.3603	0.9158	0.0911	6.0102	0.0195	0.1328	0.5591	0.0152	0.2734
10Ca48.	55		36.7046	20.6235	0.0234	1.1285	13.1528	23.4132	0.66	5.1449	100.851	5.9318	0.0682	6	3.8599	0.1372	0.0028	4	1.7777	3.2052	0.8909	0.159	6.0328	0.0227	0.1249	0.5313	0.0264	0.2947
10Ca48.	56		37.2073	20.8937	0.045	0.4057	13.7053	24.1544	0.5588	4.2732	101.244	5.9846	0.0154	6	3.9454	0.0491	0.0055	3.9999	1.8436	3.2911	0.7364	0.134	6.0051	0.0082	0.1145	0.548	0.0223	0.307
10Ca48.	57		37.1089	20.7199	0.0267	0.4723	14.5627	21.6171	0.5986	5.3827	100.489	5.9945	0.0055	6	3.9393	0.0574	0.0032	3.9999	1.9674	2.958	0.9317	0.1442	6.0012	0.0096	0.1457	0.4929	0.024	0.3278
10Ca48.	58		36.6853	20.1606	0.0384	0.9132	12.6788	25.0196	0.6733	3.6295	99.7986	5.998	0.002	6	3.8828	0.1124	0.0047	3.9999	1.7337	3.4652	0.6358	0.1641	5.9988	0.0187	0.0873	0.5776	0.0274	0.289
10Ca48.	60		36.0949	18.598	0.2202	3.8129	6.8379	30.2544	0.3267	4.6482	100.793	5.9124	0.0876	6	3.5028	0.47	0.0271	4	0.9367	4.198	0.8158	0.0798	6.0303	0.0779	0.0573	0.6962	0.0132	0.1553
10Ca48.	61		36.7431	20.6197	0.0434	0.8704	13.2615	23.7309	0.6467	4.6803	100.596	5.952	0.048	6	3.8886	0.1061	0.0053	4	1.7966	3.2563	0.8123	0.1562	6.0214	0.0176	0.1173	0.5408	0.0259	0.2984
10Ca48.	62		36.5784	20.9636	0.1018	0.8333	11.1413	29.561	0.3831	2.3647	101.927	5.9008	0.0992	6	3.8865	0.1012	0.0124	4	1.5031	4.0396	0.4087	0.0921	6.0435	0.0167	0.0509	0.6684	0.0152	0.2487
10Ca48.	63		36.6704	20.4497	0.0217	0.9663	12.5113	24.7303	0.6749	4.2956	100.32	5.9612	0.0388	6	3.8791	0.1182	0.0027	4	1.7009	3.4055	0.7482	0.1636	6.0182	0.0196	0.1047	0.5659	0.0272	0.2826
10Ca48.	64		36.9506	20.4648	0.03	1.1068	14.4973	22.233	0.3449	5.3897	101.017	5.9669	0.0331	6	3.8618	0.1345	0.0036	4	1.9579	3.0413	0.9325	0.083	6.0148	0.0224	0.1327	0.5056	0.0138	0.3255
10Ca48.	65		36.5933	20.0604	0.0617	1.2976	10.6038	27.0378	0.5937	3.88	100.128	5.9735	0.0265	6	3.833	0.1594	0.0076	4	1.4476	3.7388	0.6786	0.1445	6.0095	0.0265	0.0864	0.6221	0.024	0.2409
10Ca48.	66		35.8446	17.8044	0.2853	4.606	2.6392	33.9074	0.1128	4.9756	100.175	5.9238	0.0762	6	3.3917	0.5728	0.0355	4	0.3648	4.7468	0.881	0.0278	6.0204	0.0951	0.0512	0.7885	0.0046	0.0606
10Ca48.	67		36.9078	20.5952	0.03	0.9776	13.6873	24.6025	0.5887	3.8408	101.23	5.9587	0.0413	6	3.8775	0.1188	0.0036	4	1.8481	3.3647	0.6644	0.1417	6.0189	0.0197	0.0907	0.559	0.0235	0.307
10Ca48.	68		35.9772	19.0439	0.2019	3.1552	7.9019	30.4377	0.4776	3.4393	100.635	5.9029	0.0971	6	3.5855	0.3896	0.0249	4	1.0843	4.2304	0.6046	0.1168	6.0361	0.0645	0.0356	0.7009	0.0194	0.1796
10Ca48.	70		36.4949	19.9603	0.0617	2.0992	9.9314	28.3627	0.7976	3.4448	101.153	5.9201	0.0799	6	3.7361	0.2563	0.0075	3.9999	1.3473	3.8974	0.5987	0.1929	6.0363	0.0425	0.0567	0.6457	0.032	0.2232
10Ca48.	71		36.8736	20.8257	0.0384	0.4831	12.4535	26.808	0.4146	3.2084	101.105	5.9655	0.0345	6	3.9364	0.0588	0.0047	3.9999	1.685	3.6739	0.5562	0.1	6.015	0.0098	0.0827	0.6108	0.0166	0.2801
10Ca48.	72		36.5698	19.7978	0.0601	2.0062	8.2873	30.4106	0.6816	3.0783	100.892	5.9503	0.0497	6	3.7469	0.2457	0.0074	3.9999	1.1277	4.1916	0.5367	0.1653	6.0213	0.0408	0.0483	0.6961	0.0275	0.1873
10Ca48.	73		36.3559	19.3765	0.0467	2.8214	5.5353	33.7563	0.4942	2.8558	101.242	5.9259	0.0741	6	3.6482	0.3461	0.0057	4	0.7545	4.6609	0.4987	0.1201	6.0342	0.0574	0.0253	0.7724	0.0199	0.125
10Ca48.	95		36.2403	20.4175	0.0534	1.4164	10.4481	28.0321	0.3267	3.8814	100.816	5.9014	0.0986	6	3.8198	0.1736	0.0065	3.9999	1.4229	3.8668	0.6772	0.0793	6.0461	0.0287	0.0833	0.6395	0.0131	0.2353
10Ca48.	97		36.0991	19.6089	0.035	2.6393	6.3669	33.5936	0.5306	2.3003	101.174	5.8964	0.1036	6	3.6713	0.3244	0.0043	4	0.8697	4.6481	0.4026	0.1292	6.0497	0.0536	0.0129	0.7683	0.0214	0.1438
10Ca48.	98		35.8039	19.4974	0.0317	2.6102	5.4977	33.3482	0.4925	2.9859	100.267	5.8916	0.1084	6	3.6728	0.3232	0.0039	4	0.7566	4.6484	0.5264	0.1208	6.0523	0.0534	0.0336	0.768	0.02	0.125
																								0.0951	0.1457	0.7885	0.032	0.3278
																								0.0082	0.0129	0.4929	0.0046	0.0606
Metapelite	lab#	Comment	SiO2	Al2O3	TiO2	Fe2O3	FeO	MnO	MgO	CaO	Sum	Si	Alt	Sum	Alo	Fe3+	Ti	Sum1	Fe2+	Mn	Ca	Mg	Sum2	Xand	Xgross	Xspes	Xpyr	Xalm
11Ca105.	2	scan	36.5013	21.2565	0.1135	0.6813	31.0888	0.4119	0.7048	9.4852	100.319	5.8729	0.1271	6	3.9038	0.0825	0.0137	4	4.1833	0.0561	1.6352	0.169	6.0437	0.0136	0.2569	0.0093	0.028	0.6922
11Ca105.	3	scan	35.1022	20.8786	0.0667	1.246	30.1445	0.6534	0.7877	9.3019	98.3403	5.7832	0.2168	6	3.8372	0.1545	0.0083	4	4.1534	0.0912	1.642	0.1935	6.0801	0.0254	0.2447	0.015	0.0318	0.6831
11Ca105.	4	scan	35.4509	21.0713	0.1151	1.1285	31.3078	0.6301	0.6998	8.8626	99.356	5.7906	0.2094	6	3.8471	0.1387	0.0141	4	4.2768	0.0872	1.5511	0.1704	6.0855	0.0228	0.2321	0.0143	0.028	0.7028
11Ca105.	5	scan	35.1215	20.7218	0.1085	1.2029	29.7961	1.0523	0.534	9.4321	98.1378	5.8023	0.1977	6	3.8369	0.1495	0.0135	4	4.1167	0.1473	1.6696	0.1315	6.0651	0.0247	0.2506	0.0243	0.0217	0.6788
11Ca105.	6	scan	35.1193	20.8106	0.0884	1.4889	29.9955	1.6605	0.534	9.0809	98.9223	5.773	0.227	6	3.8048	0.1842	0.0109	3.9999	4.1237	0.2312	1.5994	0.1309	6.0851	0.0303	0.2326	0.038	0.0215	0.6777
11Ca105.	7	scan	35.1386	21.0959	0.1752	0.8784	29.1889	2.4107	0.4826	9.1858	98.6255	5.7799	0.2201	6	3.8696	0.1087	0.0217	4	4.0153	0.3359	1.6189	0.1183	6.0884	0.0179	0.248	0.0552	0.0194	0.6595
11Ca105.	8	scan	35.0359	20.8937	0.0951	0.8973	29.249	3.6426	0.2968	8.1658	98.3602	5.7999	0.2001	6	3.8763	0.1118	0.0118	4	4.0494	0.5107	1.4484	0.0733	6.0817	0.0184	0.2198	0.084	0.012	0.6658
11Ca105.	9	scan	35.2092	20.8597	0.2002	1.2078	26.4172	5.9435	0.4908	8.6079	98.9472	5.7859	0.2141	6	3.8258	0.1494	0.0248	4	3.6305	0.8273	1.5156	0.1202	6.0936	0.0245	0.2242	0.1358	0.0197	0.5958
11Ca105.	11	scan	35.1578	20.5101	0.1552	1.368	27.768	3.5315	0.3731	9.2236	98.2315	5.8134	0.1866	6	3.8104	0.1702	0.0193	3.9999	3.8399	0.4946	1.6341	0.092	6.0606	0.0281	0.2415	0.0816	0.0152	0.6336
11Ca105.	12	scan	35.145	20.8937	0.1418	1.2802	28.44	2.8678	0.466	9.2935	98.7996	5.7766	0.2234	6	3.8241	0.1583	0.0175	4	3.9094	0.3993	1.6367	0.1142	6.0595	0.0261	0.244	0.0659	0.0188	0.6452
11Ca105.	13	scan	34.8541	20.7614	0.0184	1.2995	30.1504	1.5947	0.6401	8.6373	98.0339	5.7787	0.2213	6	3.8355	0.1621	0.0023	3.9999	4.1806	0.2239	1.5344	0.1582	6.0971	0.0266	0.2251	0.0367	0.0259	0.6857
11Ca105.	14	scan	34.8583	20.922	0.1285	0.9851	30.5376	1.1569	0.5887	8.8108	97.9923	5.7756	0.2244	6	3.8611	0.1228	0.016	4	4.2315	0.1624	1.5641	0.1454	6.1034	0.0201	0.2362	0.0266	0.0238	0.6933
11Ca105.	15	scan	35.4509	20.8616	0.1085	1.3061	29.3546	0.7579	0.4394	10.592	98.9083	5.8019	0.1981	6	3.8257	0.1609	0.0134	4	4.0178	0.1051	1.8573	0.1072	6.0874	0.0264	0.2787	0.0173	0.0176	0.66
11Ca105.	16	scan	35.0359	20.7406	0.0934	1.4217	30.3763	0.6714	0.6036	9.2474	98.4114	5.7795	0.2205	6	3.8119	0.1765	0.0116	3.9999	4.1907	0.0938	1.6344	0.1484	6.0674	0.0291	0.2403	0.0155	0.0245	0.6907
11Ca105.	17	scan	35.0166	21.0713	0.0934	1.068	30.9287	0.5565	0.6169	9.1774	98.5449	5.7664	0.2336	6	3.856	0.1323	0.0116	4	4.2595	0.0776	1.6193	0.1514	6.1079	0.0217	0.2434	0.0127	0.0248	0.6974
11Ca105.	18	scan	35.3226	20.9523	0.0851	1.2152	31.0265	0.4661	0.6898	9.1046	98.9316	5.7911	0.2089	6	3.8395	0.1499	0.0105	4	4.2541	0.0647	1.5993	0.1686	6.0868	0.0246	0.2381	0.0106	0.0277	0.6989
11Ca105.	19	scan	35.4124	21.1884	0.035	0.8382	31.3696	0.4403	0.8308	8.7241	98.8645	5.8013	0.1987	6	3.8923	0.1033	0.0043	4	4.2978	0.0611	1.5313	0.2029	6.0931	0.017	0.2344	0.01	0.0333	0.7054
11Ca105.	20	scan	35.2242	21.3585	0.0768	0.7863	30.8927	0.3202	0.8192	9.2613	98.7874	5.7701	0.2299	6	3.8936	0.0969	0.0095	4	4.2322	0.0444	1.6255	0.2	6.1022	0.0159	0.2505	0.0073	0.0328	0.6936
Cations based on 48 negative charges including 10 cations in the tetrahedral and octahedral site to calculate Fe3+

## Sheet: Clinopyroxene
		Clinopyroxene
File	lab#	SiO2	TiO2	Al2O3	Fe2O3	FeO'	MnO	MgO	CaO	Na2O	Sum	Si	Alt	Sum1	Alo	Ti	Fe3+	Fe2+	Mn	Mg	Ca	Na	Sum2	O'	Tcpx	Mcpx	Ts	Acm	Opx	Hed	Diop	XFe	XFe3+
10Ca91.	146	49.7224	1.0445	2.7888	3.1531	6.4552	0.2686	15.0174	19.7848	0.3343	98.5874	1.8758	0.124	1.9998	0	0.0296	0.0895	0.2037	0.0086	0.8446	0.7997	0.0245	2.0002	6.0003	0.0296	0.0086	0.0944	0.0895	0.2247	0.1075	0.4457	0.1943	0.3053
10Ca91.	147	49.6048	1.0862	2.7624	4.7516	5.0966	0.2492	15.155	20.4032	0.3855	99.5079	1.8556	0.1218	1.9774	0	0.0306	0.1338	0.1594	0.0079	0.8451	0.8178	0.028	2.0226	6.0002	0.0306	0.0079	0.0912	0.1338	0.2102	0.0835	0.4428	0.1587	0.4562
10Ca91.	148	50.4156	1.0678	2.8455	2.4017	7.0142	0.288	14.8897	20.0912	0.3572	99.4223	1.8863	0.1137	2	0.0118	0.0301	0.0676	0.2195	0.0091	0.8305	0.8054	0.0259	2	6.0008	0.0301	0.0091	0.0836	0.0676	0.2205	0.1231	0.466	0.209	0.2355
10Ca91.	149	49.9984	1.0829	2.8077	3.0992	6.514	0.2221	14.956	19.9261	0.395	99.0449	1.8778	0.1222	2	0.0021	0.0306	0.0876	0.2046	0.0071	0.8374	0.8019	0.0288	2	6.0006	0.0306	0.0071	0.0916	0.0876	0.2269	0.1092	0.4471	0.1964	0.2998
10Ca91.	150	49.8037	1.0862	2.8871	3.6139	6.1627	0.1898	15.0638	19.9989	0.3666	99.1728	1.8679	0.1276	1.9955	0	0.0306	0.102	0.1933	0.006	0.8422	0.8036	0.0267	2.0045	6	0.0306	0.006	0.097	0.102	0.223	0.1011	0.4403	0.1867	0.3454
10Ca91.	152	49.9813	1.0295	2.8002	3.8039	5.7384	0.2415	15.281	19.9373	0.4152	99.2824	1.8707	0.1235	1.9943	0	0.029	0.1071	0.1796	0.0077	0.8526	0.7996	0.0301	2.0057	6.001	0.029	0.0077	0.0945	0.1071	0.2306	0.0924	0.4387	0.174	0.3736
10Ca91.	153	49.9107	1.0678	2.7133	4.1275	5.4768	0.2428	15.213	20.3375	0.3761	99.5352	1.8658	0.1195	1.9853	0	0.03	0.1161	0.1712	0.0077	0.8478	0.8146	0.0273	2.0147	6.0011	0.03	0.0077	0.0895	0.1161	0.2127	0.0914	0.4526	0.168	0.4041
10Ca91.	154	49.8743	1.0278	2.7794	3.9121	5.3927	0.2027	15.4502	20.1892	0.3356	99.1863	1.8668	0.1226	1.9894	0	0.0289	0.1102	0.1688	0.0064	0.8621	0.8097	0.0244	2.0106	6.0003	0.0289	0.0064	0.0937	0.1102	0.2147	0.0894	0.4567	0.1637	0.3949
10Ca91.	155	50.3514	0.9894	2.8588	3.3046	6.0191	0.2105	15.3424	20.0185	0.403	99.5265	1.8776	0.1224	2	0.0033	0.0278	0.0927	0.1877	0.0066	0.8529	0.7998	0.0291	2	6.0005	0.0278	0.0066	0.0946	0.0927	0.2293	0.099	0.4499	0.1804	0.3307
10Ca91.	156	50.2402	1.0044	2.7322	3.3529	5.8303	0.2505	15.3076	20.1626	0.3828	99.2634	1.8783	0.1204	1.9987	0	0.0283	0.0943	0.1823	0.0079	0.8531	0.8077	0.0277	2.0013	6	0.0283	0.0079	0.0921	0.0943	0.2201	0.0981	0.4592	0.1761	0.341
10Ca91.	158	50.4199	0.9744	2.7416	3.3216	5.861	0.266	15.1782	20.4578	0.3815	99.6165	1.8796	0.1204	2	0.0001	0.0273	0.0932	0.1827	0.0084	0.8435	0.8172	0.0276	2	6.0002	0.0273	0.0084	0.093	0.0932	0.2104	0.1011	0.4666	0.1781	0.3377
10Ca91.	159	50.3856	0.9894	2.77	3.195	6.011	0.2286	15.3689	20.3081	0.3195	99.6119	1.8781	0.1217	1.9998	0	0.0277	0.0896	0.1874	0.0072	0.854	0.8111	0.0231	2.0002	6.0006	0.0277	0.0072	0.0939	0.0896	0.212	0.1025	0.467	0.1799	0.3235
10Ca91.	160	50.2594	0.901	2.5243	3.4144	5.8496	0.2402	15.4004	20.0352	0.3653	98.9898	1.884	0.1115	1.9955	0	0.0254	0.0963	0.1834	0.0076	0.8606	0.8047	0.0265	2.0045	6	0.0254	0.0076	0.0861	0.0963	0.2219	0.0988	0.4638	0.1757	0.3444
10Ca91.	161	50.484	0.896	2.7454	4.0468	5.1184	0.2286	15.553	20.6285	0.3599	100.063	1.8715	0.12	1.9915	0	0.025	0.1129	0.1587	0.0072	0.8595	0.8194	0.0259	2.0085	6	0.025	0.0072	0.095	0.1129	0.2065	0.0863	0.4672	0.1558	0.4157
10Ca91.	162	50.069	0.931	2.77	4.1638	4.8562	0.1498	15.4419	20.8776	0.3073	99.5721	1.8658	0.1217	1.9874	0	0.0261	0.1168	0.1513	0.0047	0.8578	0.8336	0.0222	2.0126	6.0001	0.0261	0.0047	0.0956	0.1168	0.1886	0.0852	0.483	0.15	0.4355
10Ca91.	163	50.5803	0.916	2.6868	3.0317	5.5687	0.2195	15.3258	20.7432	0.3491	99.4468	1.8854	0.1146	2	0.0034	0.0257	0.085	0.1736	0.0069	0.8516	0.8285	0.0252	2	6.0004	0.0257	0.0069	0.0889	0.085	0.1968	0.101	0.4956	0.1693	0.3288
10Ca91.	164	50.606	0.911	2.8304	3.2338	5.3946	0.1989	15.5331	20.5543	0.3693	99.6438	1.8806	0.1194	2	0.0046	0.0255	0.0904	0.1677	0.0063	0.8605	0.8184	0.0266	2	6.0002	0.0255	0.0063	0.0939	0.0904	0.2082	0.0939	0.4819	0.1631	0.3504
10Ca91.	165	49.808	0.886	2.7397	4.4258	4.3927	0.266	15.6044	20.49	0.3505	98.9813	1.865	0.1209	1.9859	0	0.025	0.1247	0.1376	0.0084	0.871	0.822	0.0254	2.0141	6.0003	0.025	0.0084	0.0959	0.1247	0.2034	0.074	0.4685	0.1364	0.4755
10Ca91.	166	51.3055	0.7375	2.1634	1.9218	6.3409	0.2892	15.5182	20.6033	0.2844	99.213	1.915	0.085	2	0.0102	0.0207	0.054	0.1979	0.0091	0.8635	0.824	0.0206	2	6.0008	0.0207	0.0091	0.0643	0.054	0.1966	0.1222	0.5331	0.1865	0.2143
10Ca91.	167	51.0724	0.7892	2.1162	3.0123	5.5218	0.1743	15.6624	20.7223	0.3478	99.4499	1.9018	0.0929	1.9947	0	0.0221	0.0844	0.172	0.0055	0.8695	0.8268	0.0251	2.0053	6.0005	0.0221	0.0055	0.0708	0.0844	0.1983	0.1022	0.5167	0.1651	0.3293
10Ca91.	168	51.2713	0.7742	2.0727	2.5162	6.1535	0.2221	15.4104	20.7027	0.3518	99.4784	1.9102	0.0898	2	0.0012	0.0217	0.0705	0.1917	0.007	0.8559	0.8264	0.0254	2	6.0001	0.0217	0.007	0.0681	0.0705	0.199	0.116	0.5177	0.183	0.269
10Ca91.	169	50.6873	0.7792	2.171	3.657	5.0523	0.1937	15.6972	20.8244	0.3019	99.3764	1.89	0.0954	1.9855	0	0.0219	0.1026	0.1576	0.0061	0.8726	0.832	0.0218	2.0145	6.0002	0.0219	0.0061	0.0736	0.1026	0.1898	0.0927	0.5133	0.1529	0.3944
10Ca91.	170	51.0552	0.8059	2.12	3.1459	5.3553	0.1924	15.7404	20.7838	0.3316	99.5472	1.8989	0.0929	1.9918	0	0.0225	0.088	0.1666	0.0061	0.8727	0.8283	0.0239	2.0082	6.0002	0.0225	0.0061	0.0704	0.088	0.1957	0.0989	0.5184	0.1603	0.3458
10Ca91.	171	50.9547	0.8109	2.1238	3.0204	5.7499	0.2324	15.5364	20.6327	0.3329	99.4075	1.9002	0.0933	1.9936	0	0.0228	0.0848	0.1793	0.0073	0.8637	0.8244	0.0241	2.0064	6.0002	0.0228	0.0073	0.0706	0.0848	0.1996	0.1057	0.5092	0.1719	0.321
10Ca91.	173	44.8062	0.6357	6.2428	7.8532	4.3474	0.2027	16.1699	15.2472	0.2669	95.7992	1.7347	0.2653	2	0.0195	0.0185	0.2288	0.1408	0.0066	0.9332	0.6325	0.02	2	6.0005	0.0185	0.0066	0.2468	0.2288	0.3876	0.0146	0.097	0.1311	0.6191
10Ca91.	174	50.7044	0.8142	2.0935	3.9314	5.0923	0.2518	15.873	20.3822	0.3464	99.4893	1.8886	0.0919	1.9805	0	0.0228	0.1102	0.1586	0.0079	0.8814	0.8134	0.025	2.0195	6	0.0228	0.0079	0.0691	0.1102	0.2116	0.0882	0.4902	0.1525	0.4099
10Ca91.	176	50.8306	0.8092	2.2749	3.2111	6.0029	0.142	15.6077	20.2759	0.337	99.5003	1.8945	0.0999	1.9944	0	0.0227	0.0901	0.1871	0.0045	0.8672	0.8097	0.0244	2.0056	6.0001	0.0227	0.0045	0.0772	0.0901	0.2147	0.1049	0.486	0.1775	0.3249
10Ca91.	177	48.4003	2.1073	2.1408	3.9224	5.157	0.1808	14.3938	21.3547	0.3046	98.0053	1.8464	0.0962	1.9426	0	0.0605	0.1126	0.1645	0.0058	0.8186	0.8728	0.0225	2.0574	6.0007	0.0605	0.0058	0.0358	0.1126	0.1497	0.1064	0.5292	0.1674	0.4063
10Ca91.	178	50.7964	0.8726	2.0954	3.4006	5.9597	0.2066	15.5878	20.2353	0.3545	99.515	1.8946	0.0921	1.9867	0	0.0245	0.0954	0.1859	0.0065	0.8667	0.8086	0.0256	2.0133	6.0001	0.0245	0.0065	0.0676	0.0954	0.217	0.104	0.4849	0.1766	0.3392
10Ca91.	179	50.9975	0.8676	2.1634	2.7565	6.5135	0.2402	15.4618	20.1556	0.3491	99.5198	1.902	0.0951	1.9971	0	0.0243	0.0774	0.2032	0.0076	0.8597	0.8055	0.0252	2.0029	6.0002	0.0243	0.0076	0.0708	0.0774	0.2198	0.1147	0.4854	0.1912	0.2758
10Ca91.	180	50.4498	0.8943	2.0803	3.6764	5.664	0.2247	15.2611	20.5446	0.3693	99.1847	1.8904	0.0919	1.9823	0	0.0252	0.1037	0.1775	0.0071	0.8525	0.8248	0.0268	2.0177	6.0003	0.0252	0.0071	0.0667	0.1037	0.202	0.1026	0.4927	0.1723	0.3687
10Ca91.	181	50.6958	0.8659	2.1238	2.712	6.5124	0.266	15.218	20.1584	0.3586	98.9352	1.9033	0.094	1.9973	0	0.0245	0.0766	0.2045	0.0085	0.8517	0.8109	0.0261	2.0027	6.0005	0.0245	0.0085	0.0695	0.0766	0.2152	0.1173	0.4885	0.1936	0.2726
10Ca91.	182	50.6381	0.8843	2.1162	3.0393	6.3492	0.2621	15.3656	20.1108	0.3397	99.1185	1.8978	0.0935	1.9913	0	0.0249	0.0857	0.199	0.0083	0.8585	0.8076	0.0247	2.0087	6.0003	0.0249	0.0083	0.0685	0.0857	0.2171	0.112	0.4833	0.1882	0.3011
Normalisation to 4 cations to calculate Fe3+
*value calculated
